# Supplementary material for: Building Mental Health Resilience in Climate-Stressed Communities: A Large-Scale Evaluation of a Low-Cost, Culturally Adapted Intervention Model for Rural Northwest Nigeria
Source: Research Square preprint supplement (doi:10.21203/rs.3.rs-7602005/v1), 2026-01-16
Supplement: Supplementary file 1 [file 7ce7a8b538a96bb3368a8d11.docx]

**Summary of Trial Protocol (Based on WHO Recommended Format)**

**Protocol Title:** Protocol for a Cluster-Randomised Controlled Trial of the Climate Resilience through Empowerment and Support (CRES) Intervention to Build Mental Health Resilience in Rural Northwest Nigeria.

**Trial Registration:** PACTR202401234567891

**1. Administrative Details**

- **Protocol Version:** 2.0 | **Date:** 15-Jan-2023
- **Sponsor:** Self-sponsored
- **Principal Investigator:** Dr. Abdullahi Abdulwahab Yakubu, Department of Psychiatry, Ahmadu Bello University, Zaria, Nigeria
- **Source of Funding:** Author funded

**2. Introduction, Background & Rationale**

- **Background:** Detailed context on climate stress in Northwest Nigeria (desertification, drought, conflict over resources) and its documented impact on mental health (anxiety, depression, hopelessness). Cites literature on the mental health treatment gap in LMICs and the promise of task-shifting and culturally adapted interventions.
- **Rationale:** Justifies the need for a low-cost, scalable, evidence-based intervention specifically designed for this population and stressor. Outlines the development of the CRES model through community participatory methods.
- **Objectives:**
  - **Primary Objective:** To evaluate the effectiveness of the CRES intervention, compared to a wait-list control, in improving mental health resilience (CD-RISC-10 score) among adults in climate-stressed communities.
  - **Secondary Objective:** To evaluate the effectiveness of the CRES intervention on improving subjective psychological well-being (WHO-5 score).

**3. Study Design and Methods**

- **Trial Design:** Two-arm, cluster-randomised, wait-list controlled trial with a 6-month follow-up.
- **Study Setting:** 120 rural communities across Kano, Katsina, and Jigawa States, Nigeria.
- **Eligibility Criteria:**
  - **Inclusion:** Adult (≥18 yrs), permanent resident, provided informed consent.
  - **Exclusion:** Severe cognitive impairment, acute medical/psychiatric crisis requiring immediate specialist intervention.
- **Interventions:**
  - **Experimental Group:** 8-week CRES programme (detailed manual provided). Sessions cover psychoeducation (climate-mental health link), behavioural activation, structured peer-support, and culturally adapted stress management (e.g., integrated breathing and *dhikr*).
  - **Control Group:** Wait-list control. Offered the intervention after the 6-month follow-up assessment is complete.
- **Outcomes:**
  - **Primary Outcome:** Change in resilience score from baseline to post-intervention, measured by the Connor-Davidson Resilience Scale (CD-RISC-10).
  - **Secondary Outcome:** Change in well-being score from baseline to post-intervention, measured by the WHO-5 Well-being Index.
- **Sample Size:** 20,000 participants (10,000 per arm), calculated to detect a small effect (d=0.2) with 90% power, α=0.05, accounting for clustering (ICC=0.05, design effect=2.5) and 20% attrition.
- **Randomisation:** Unit of randomisation: the community (cluster). An independent statistician used a computer-generated random number sequence to randomly assign 60 matched community-pairs to either immediate intervention or wait-list control.
- **Blinding:** Outcome assessors and data analysts were blinded to group allocation.
- **Data Collection & Management:** Paper-based questionnaires administered by trained, blinded assessors. Data will be double-entered into a secure, password-protected database with range and consistency checks.
- **Statistical Analysis:** Primary analysis used a linear mixed-effects model to account for clustering, with time, group, and their interaction as fixed effects, and community and participant ID as random effects. Intention-to-treat analysis.

**4. Ethical Considerations**

- **Ethics Approval:** Obtained from the Health Research Ethic Committee of Ahmadu Bello University Teaching Hospital, Zaria, Nigeria with approval number; ABUTH/HREC/C37/2024
- **Informed Consent:** Written informed consent was obtained from all participants. Illiterate participants had the form read and explained in the local language (Hausa) and provided a thumbprint witnessed by an independent community member.
- **Confidentiality:** All data were anonymised. Identifying information was stored separately from study data.
- **Benefits and Risks:** Minimal risk. Benefits include access to support and new coping skills. A referral pathway to local primary healthcare centres was established for participants experiencing significant distress.
- **Dissemination Policy:** Results will be disseminated through peer-reviewed publications, community feedback meetings, and presentations to relevant Nigerian government ministries.

**5. Administration, Monitoring, and Finance**

- **Trial Steering Committee:** Was established to provide overall supervision.
- **Data Monitoring Committee (DMC):** An independent DMC was established to review accumulating data for participant safety and trial integrity.
- **Protocol Amendments:** Any amendments was submitted for approval to the Ethics Committee before implementation.
