# Supplementary material for: Building Mental Health Resilience in Climate-Stressed Communities: A Large-Scale Evaluation of a Low-Cost, Culturally Adapted Intervention Model for Rural Northwest Nigeria
Source: Research Square preprint supplement (doi:10.21203/rs.3.rs-7602005/v1), 2026-01-16
Supplement: Supplementary file 2 [file 7e9593d73b65c78bc71487a5.docx]

**Point-by-point Response to the Revisions Sought**

| Serial Number | Comment | Response |
| --- | --- | --- |
| 1 | As your submission is a clinical trial, we have a few extra submission requirements that we will need you to meet before we can proceed:    - Clinical trial registration numbers and date of registration must be added to the Manuscript file. These details will be included in the published paper.  - Manuscripts reporting results of a clinical trial must conform to CONSORT 2010 guidelines. Please provide a completed CONSORT checklist with page numbers stated, available at [www.consort-statement.org/](http://www.consort-statement.org/)  - Please could you also provide a separate document detailing the trial protocol. This will be subject to peer review. For an example of an appropriate research protocol layout, please see the WHO recommendation at <https://www.who.int/groups/research-ethics-review-committee/recommended-format-for-a-research-protocol/> | -Trial registration date and number added (7)  -CONSORT 2010 checklist attached  -Trial protocol attached |
| 2 | We strongly encourage all authors to share their raw data, either by providing it in a supplementary file or depositing it in a public repository and providing the details on how to access it in this section. If you do not wish to share your data, please clearly state this in this section along with a justification | Raw data attached |
| 3 | Please review the cover letter and ensure that the correct journal name is included. | Cover letter updated to reflect journal name. |
