# Supplementary material for: Building Mental Health Resilience in Climate-Stressed Communities: A Large-Scale Evaluation of a Low-Cost, Culturally Adapted Intervention Model for Rural Northwest Nigeria
Source: Research Square preprint supplement (doi:10.21203/rs.3.rs-7602005/v1), 2026-01-16
Supplement: Supplementary file 3 [file c4ba33fde32077fc987249b7.docx]

**Clinical Trial Registration Details**

This trial was registered with the Nigeria Clinical Trials Registry (NCTR) under the unique identifier **NCTR/CLN/002/8341** on 18 December, 2023.

**CONSORT 2010 Checklist**

**Title:** Building Mental Health Resilience in Climate-Stressed Communities: A Large-Scale Evaluation of a Low-Cost, Culturally Adapted Intervention Model for Rural Northwest Nigeria

| **Section/Topic** | **Item No** | **Checklist Item** | **Reported on Page No** |
| --- | --- | --- | --- |
| **Title and abstract** | 1a | Identification as a randomised trial in the title | 1 (Title indicates quasi-experimental, not RCT) |
|  | 1b | Structured summary of trial design, methods, results, and conclusions | 1 (Abstract) |
| **Introduction** |  |  |  |
| Background and objectives | 2a | Scientific background and explanation of rationale | 2 |
|  | 2b | Specific objectives or hypotheses | 2 |
| **Methods** |  |  |  |
| Trial design | 3a | Description of trial design (e.g., parallel, cluster) | 3 |
|  | 3b | Important changes to methods after trial commencement | 3 (N/A) |
| Participants | 4a | Eligibility criteria for participants | 3 |
|  | 4b | Settings and locations where the data were collected | 3 |
| Interventions | 5 | The interventions for each group with sufficient details to allow replication | 4 |
| Outcomes | 6a | Completely defined pre-specified primary and secondary outcome measures | 4 |
|  | 6b | Any changes to trial outcomes after the trial commenced | 4 (N/A) |
| Sample size | 7a | How sample size was determined | 3 |
|  | 7b | When applicable, explanation of any interim analyses and stopping guidelines | 3 (N/A) |
| **Randomisation:** |  |  |  |
| Sequence generation | 8a | Method used to generate the random allocation sequence | 6 |
|  | 8b | Type of randomisation; details of any restriction (e.g., blocking) | 6 |
| Allocation concealment mechanism | 9 | Mechanism used to implement the random allocation sequence | 6 |
| Implementation | 10 | Who generated the allocation sequence, who enrolled participants, and who assigned participants to interventions | 6 |
| Blinding | 11a | If done, who was blinded after assignment to interventions | 6 |
|  | 11b | If relevant, description of the similarity of interventions | 4, 6 (N/A - Control was wait-list) |
| Statistical methods | 12a | Statistical methods used to compare groups for primary and secondary outcomes | 7 |
|  | 12b | Methods for additional analyses, such as subgroup analyses | 7 |
| **Results** |  |  |  |
| Participant flow (a diagram is strongly recommended) | 13a | For each group, the numbers of participants who were randomly assigned, received intended treatment, and were analysed for the primary outcome | 5, Fig 1 |
|  | 13b | For each group, losses and exclusions after randomisation, together with reasons | 5 |
| Recruitment | 14a | Dates defining the periods of recruitment and follow-up | 3 |
|  | 14b | Why the trial ended or was stopped | 3 (Completed) |
| Baseline data | 15 | A table showing baseline demographic and clinical characteristics for each group | 8 (Table 1) |
| Numbers analysed | 16 | For each group, number of participants (denominator) included in each analysis and whether the analysis was by original assigned groups | 8 |
| Outcomes and estimation | 17a | For each primary and secondary outcome, results for each group, and the estimated effect size and its precision | 9 (Table 2), 8 |
|  | 17b | For binary outcomes, presentation of both absolute and relative effect sizes is recommended | 8 (N/A - Continuous) |
| Ancillary analyses | 18 | Results of any other analyses performed, including subgroup analyses | 8 |
| Harms | 19 | All important harms or unintended effects in each group | 8 (N/A) |
| **Discussion** |  |  |  |
| Limitations | 20 | Trial limitations, addressing sources of potential bias, imprecision, and, if relevant, multiplicity of analyses | 12 |
| Generalisability | 21 | Generalisability (external validity, applicability) of the trial findings | 11-12 |
| Interpretation | 22 | Interpretation consistent with results, balancing benefits and harms, and considering other relevant evidence | 11-12 |
| **Other information** |  |  |  |
| Registration | 23 | Registration number and name of trial registry | 1, 7 |
| Protocol | 24 | Where the full trial protocol can be accessed | 1, 3 (N/A - Not mentioned) |
| Funding | 25 | Sources of funding and other support; role o |  |
