# Supplementary material for: Building Mental Health Resilience in Climate-Stressed Communities: A Large-Scale Evaluation of a Low-Cost, Culturally Adapted Intervention Model for Rural Northwest Nigeria
Source: Research Square preprint supplement (doi:10.21203/rs.3.rs-7602005/v1), 2026-01-16
Supplement: Supplementary file 4 [file d2fa47af464b47e7c28c87f5.xlsx]

## Sheet: Sheet1
Group	Age	Gender	Occupation	CropFailure	CDRISC_Baseline	CDRISC_Post	CDRISC_FollowUp	WHO5_Baseline	WHO5_Post	WHO5_FollowUp
Intervention	45	Male	Farming	Yes	22.7	28.8	28.9	39.5	75.5	78.9
Intervention	36	Female	Farming	Yes	22.9	31.7	34.7	66.1	67	80.2
Intervention	46	Female	Farming	Yes	13.1	25	27.7	34	58.7	50.2
Intervention	58	Female	Pastoralism	Yes	18.8	34.4	26.3	60.2	35.9	44.5
Intervention	35	Female	Farming	Yes	15	34.3	30.9	28.8	48.1	70.6
Intervention	35	Male	Farming	Yes	21.4	31	29.6	44.8	63.4	71.5
Intervention	58	Male	Farming	Yes	19.6	27.4	23.6	57.7	74.4	62.3
Intervention	48	Female	Pastoralism	Yes	18.8	24.2	29.9	64.1	57	68.2
Intervention	32	Male	Farming	No	34.7	38.7	26	20.2	67.3	59.8
Intervention	45	Male	Farming	Yes	17	28.2	32.4	52.7	63.2	47.8
Intervention	32	Female	Farming	Yes	21.3	24.2	26.4	59.7	61.3	68.7
Intervention	32	Male	Farming	Yes	23.4	27.5	27.6	41.3	65.3	70
Intervention	41	Female	Pastoralism	Yes	22.9	31.4	24.9	42	70.9	56.2
Intervention	18	Male	Farming	Yes	23.8	24.9	33.2	19.2	61.5	50.1
Intervention	18	Female	Farming	Yes	22.9	27.5	30.9	50.9	67.9	62.3
Intervention	31	Female	Farming	Yes	20	24.2	38.4	46	67.7	51.4
Intervention	25	Male	Farming	No	21.4	35.4	34.3	40.1	52.7	43.4
Intervention	42	Male	Farming	Yes	18.6	29.5	27.3	42	80.6	64.6
Intervention	26	Male	Pastoralism	Yes	18.3	24.1	22.7	36.7	82.4	63.6
Intervention	20	Female	Farming	Yes	15.9	26.3	26.5	52.3	45.7	71.9
Intervention	57	Male	Farming	No	24.7	27.3	28.5	48.9	65.1	66.5
Intervention	35	Male	Farming	Yes	26	29.9	21.7	52.9	60.7	90.3
Intervention	39	Female	Other	Yes	18.9	26.2	25.6	49.3	69.3	71.5
Intervention	20	Male	Farming	Yes	21.1	28.4	33.3	57.2	86.9	65.6
Intervention	31	Female	Farming	No	28.1	27.3	25.6	64.8	69.8	65.9
Intervention	40	Female	Other	Yes	26.1	24.2	25.5	36.1	52.6	65.2
Intervention	23	Male	Farming	Yes	25.1	26.2	31.2	36.3	45.8	51.4
Intervention	43	Female	Farming	Yes	22.5	26.8	26.9	44	78.3	61.8
Intervention	30	Male	Farming	Yes	18.8	25	29.1	39.4	69.5	69.6
Intervention	34	Female	Farming	Yes	19.2	24.2	30.7	64.4	67.3	84.7
Intervention	30	Female	Farming	No	22.4	27.5	26.6	50.1	70.6	68.9
Intervention	62	Male	Pastoralism	Yes	23.2	33.2	32.3	39.1	69.8	52.3
Intervention	38	Male	Farming	Yes	17.3	29.2	31.9	49.4	63.9	60
Intervention	24	Female	Farming	Yes	26.6	17.4	30.4	46.8	71.5	75.8
Intervention	49	Male	Farming	Yes	27.3	33.7	35.3	51.5	63.6	49.7
Intervention	22	Female	Farming	No	24.7	27.1	32.7	47.4	65.8	59.5
Intervention	41	Male	Other	Yes	27.7	35.4	28	48.7	61	58.7
Intervention	18	Male	Farming	Yes	24.1	32.9	26	59.7	50.5	76.9
Intervention	21	Female	Other	Yes	22.6	28.6	29.7	38.2	74.2	56.5
Intervention	41	Male	Pastoralism	Yes	21.6	29	28.8	44.6	71.7	76
Intervention	48	Female	Pastoralism	Yes	20.1	25.4	28.9	57.3	61.1	60.7
Intervention	40	Male	Farming	Yes	21.4	32.3	26.8	54.8	63.9	61.7
Intervention	37	Male	Farming	Yes	17	36.1	29.3	34	50.7	66.5
Intervention	34	Female	Farming	Yes	21	27	35.5	37	65.2	60.6
Intervention	19	Female	Farming	Yes	16.5	27.4	31.9	32	50	71
Intervention	29	Female	Farming	Yes	18	37.5	29.7	44.4	61.1	40.2
Intervention	32	Female	Farming	Yes	26.6	30.1	34.2	58.7	56.4	48.2
Intervention	52	Female	Other	Yes	26.4	23.9	32.1	54.9	63.6	62.2
Intervention	43	Female	Farming	Yes	17.9	24.5	27.8	46.5	69.4	70.1
Intervention	18	Male	Farming	Yes	25.1	36.4	28.9	28.2	76.3	69.5
Intervention	42	Female	Farming	Yes	18.9	31.6	32.8	61.6	70.3	70.3
Intervention	33	Male	Farming	Yes	18.6	25.7	30.1	42.8	50.4	53.6
Intervention	29	Male	Farming	Yes	27.2	31.1	30.8	44.3	89.4	49
Intervention	46	Male	Farming	Yes	16.8	26.6	24	43.7	69.7	63.1
Intervention	51	Male	Farming	Yes	13.9	22.3	26.9	30.3	77.1	53.3
Intervention	50	Female	Farming	Yes	18.6	28.5	28.9	66.5	80.6	73.2
Intervention	27	Male	Farming	Yes	18.9	29.8	33.7	68.9	65.2	51.3
Intervention	34	Male	Farming	No	19.8	23.7	36.9	46	58.6	48.9
Intervention	42	Male	Farming	Yes	14.2	24.9	25.4	29.3	72.8	74.1
Intervention	51	Male	Farming	Yes	22.9	25.9	26.6	61	76.1	65
Intervention	32	Female	Farming	Yes	29.4	29	30.9	55.8	71.8	61.5
Intervention	36	Male	Farming	No	22.7	30.3	37.8	46.2	78.1	73.7
Intervention	24	Male	Farming	No	20.5	24.2	25	79.9	77.3	48.3
Intervention	23	Male	Pastoralism	No	24.2	27.5	21.1	59.7	76.6	57.1
Intervention	49	Male	Farming	Yes	21.7	28	29.8	36.9	73.6	71.1
Intervention	56	Female	Farming	Yes	21.6	23	23.6	27.8	49.2	72.4
Intervention	37	Male	Other	No	21.1	30.7	31.4	43.2	72	64.2
Intervention	51	Male	Farming	No	22.3	32.1	32.3	73.4	64.6	50
Intervention	43	Male	Farming	Yes	19.7	31	28.2	43.9	40.5	72.7
Intervention	30	Male	Other	Yes	14.6	24.6	27.3	47.3	67.2	51.7
Intervention	43	Female	Farming	No	29.2	32.1	26.2	34.2	65.3	53.6
Intervention	58	Male	Other	No	23.6	29.4	29.4	42.3	56.5	61.3
Intervention	38	Female	Farming	Yes	18.5	33.6	23.7	47.1	58.5	47.4
Intervention	58	Female	Farming	Yes	22.9	31.7	27.2	50.4	54.7	30.8
Intervention	18	Male	Farming	Yes	16.7	31	26.1	46.3	63.9	73.3
Intervention	49	Female	Farming	Yes	23	28.7	30.2	46	45.1	60.3
Intervention	39	Female	Farming	Yes	24.5	33.5	30.5	39.3	56.3	57.1
Intervention	34	Female	Pastoralism	Yes	25.7	25.3	34.9	57	78.5	53.5
Intervention	39	Male	Farming	Yes	23.8	24.9	25.1	61.8	71.7	82.3
Intervention	18	Female	Other	Yes	20.6	40	27.7	64.8	53.9	49.3
Intervention	35	Male	Farming	Yes	25.7	22.2	32.9	35	67.3	77
Intervention	43	Male	Pastoralism	Yes	19.1	25.2	31	30.6	60.5	58.4
Intervention	57	Female	Farming	Yes	22.7	32.9	26.4	47.8	72.1	71.8
Intervention	31	Female	Farming	Yes	18.3	23.5	23.7	59.6	78.6	72.2
Intervention	28	Male	Farming	Yes	22.4	32.7	36.7	48.2	84.5	59.1
Intervention	32	Female	Farming	Yes	27.7	34.6	22.6	41.6	61	63.2
Intervention	50	Female	Farming	Yes	24.6	35	24	55.2	66.2	47.6
Intervention	42	Male	Farming	Yes	25.3	30.1	29.9	79	62.1	63.6
Intervention	31	Male	Farming	Yes	26.1	25.2	33	32.6	69.3	77.6
Intervention	45	Male	Farming	Yes	21.1	26.2	25.5	64.5	65.9	61
Intervention	39	Female	Farming	Yes	17.7	34.7	31.9	43.3	57.5	62.3
Intervention	51	Female	Pastoralism	Yes	13.6	22.5	25	40	80.7	72.2
Intervention	29	Male	Farming	Yes	16.8	33	32.4	58.2	56	57.5
Intervention	34	Female	Farming	Yes	21.9	23.5	32.4	45.2	64.9	64.7
Intervention	33	Female	Other	Yes	12.9	29.4	25.5	32.7	71.1	79.1
Intervention	19	Female	Farming	Yes	22.1	27.4	32.7	48	57.7	62.8
Intervention	42	Male	Other	Yes	23.5	28.1	25.1	50	56.5	60.1
Intervention	41	Female	Other	Yes	14.8	35	18.9	47.8	77.5	55
Intervention	38	Female	Farming	Yes	25.1	27.7	28.5	49.3	76	97.3
Intervention	35	Male	Other	No	19.6	33.9	30.7	43.5	86.5	70.1
Intervention	20	Male	Farming	Yes	14.5	27	32.2	59.5	74	91.9
Intervention	33	Female	Other	Yes	14.3	30.8	33.5	51.5	55.3	65.3
Intervention	34	Male	Farming	Yes	21.2	29.3	24.8	28.2	50	66.9
Intervention	28	Female	Farming	Yes	21.8	24.4	29.1	26.9	48.7	66.3
Intervention	36	Male	Farming	No	21.3	24.5	27.3	67.2	51.3	72.6
Intervention	43	Male	Pastoralism	No	25.8	28.8	29	58.4	73.3	48.3
Intervention	62	Male	Farming	Yes	21.7	28.3	38.5	51.5	72.3	51.7
Intervention	40	Male	Farming	Yes	19	32.4	28.3	42.2	58.7	73.6
Intervention	41	Male	Farming	No	20.1	22.6	25.1	53	68.8	35
Intervention	37	Female	Pastoralism	Yes	25.9	26.6	28.1	60.3	75.5	51.9
Intervention	18	Male	Farming	Yes	16.7	31.5	32.6	50.6	80.2	75.9
Intervention	38	Female	Farming	Yes	22.1	28.8	31.1	56.2	78	47.5
Intervention	39	Female	Farming	Yes	22.3	24.1	33.4	71.3	60.8	66.3
Intervention	70	Male	Farming	No	25.7	31.2	36.7	33.4	71.9	47.7
Intervention	36	Male	Farming	No	21.9	33.1	36.5	45.5	64	42.7
Intervention	42	Female	Pastoralism	No	17.4	25.9	25.8	61.2	63.1	62.6
Intervention	38	Male	Other	Yes	22.2	33.6	32.2	37.3	71.1	68.2
Intervention	23	Male	Farming	Yes	24.4	27.5	21.9	46.2	66.9	54.9
Intervention	53	Female	Other	No	22	28.4	33.6	27	52.5	46.3
Intervention	48	Male	Other	Yes	26	27.7	22.8	72.5	48.5	71
Intervention	48	Male	Pastoralism	Yes	15.9	33.8	22.8	43.2	65.3	73.8
Intervention	26	Female	Pastoralism	Yes	20.7	29.2	28.3	46.9	96.6	72.6
Intervention	56	Female	Farming	Yes	21.4	32.8	32.9	41.2	63	59.2
Intervention	20	Male	Farming	No	24.6	27.9	25.2	50	53.9	69.7
Intervention	46	Female	Farming	Yes	25.2	31.2	26.9	50	64.1	71.5
Intervention	66	Female	Pastoralism	Yes	21.5	25.6	25.7	26.2	68.6	65.9
Intervention	25	Female	Other	Yes	19.9	33.7	29.7	27.6	60.8	52.6
Intervention	31	Male	Farming	Yes	22.2	28.6	32.9	61.1	76.7	66.2
Intervention	39	Female	Pastoralism	Yes	16.6	34.7	29.2	60.5	72.5	60.7
Intervention	32	Male	Farming	Yes	19.3	29.6	26.6	56.8	76.8	74.1
Intervention	18	Female	Farming	No	23.8	30.2	35.4	28.3	53.6	49
Intervention	39	Male	Farming	Yes	22.9	38.7	33.3	61.3	72.4	50.6
Intervention	24	Female	Pastoralism	Yes	18.6	32.7	25.9	31.2	67.8	84.6
Intervention	44	Male	Farming	Yes	18.1	30.6	25.4	43.3	62	70.3
Intervention	26	Male	Farming	Yes	18	25	27.4	38.2	67.3	71.8
Intervention	58	Female	Farming	Yes	18.3	26.9	33.1	84	70.7	49.2
Intervention	28	Male	Pastoralism	Yes	22	32.9	18.5	49.3	68.7	78.2
Intervention	34	Male	Farming	No	26.4	28.5	34.5	47.6	84.6	70
Intervention	49	Female	Pastoralism	Yes	27	29	27.6	52.2	49.8	72.7
Intervention	22	Female	Farming	Yes	17.5	25.6	24.1	56.1	70.5	67.3
Intervention	41	Male	Farming	Yes	22.8	31.4	29.7	37.4	61.9	87.9
Intervention	55	Male	Farming	Yes	22.6	30.2	30.3	64.1	85.1	86.7
Intervention	18	Female	Pastoralism	Yes	22.3	32.6	32.7	45.2	64.8	80.7
Intervention	40	Female	Farming	Yes	17.3	34.6	33.8	19	78.2	84.6
Intervention	41	Male	Farming	Yes	18.3	31.5	30.5	37.1	54.1	55.7
Intervention	48	Female	Farming	Yes	22.8	25.2	31.2	72.1	71.6	59.6
Intervention	22	Female	Pastoralism	No	19.8	23.9	29.4	56	62.4	69.7
Intervention	21	Male	Farming	Yes	21.8	32.7	31.8	43.5	75.6	90.7
Intervention	45	Male	Farming	Yes	17.1	30.3	26.6	58.1	65.2	44.6
Intervention	42	Male	Farming	Yes	19.3	36.6	27.5	30.9	68.9	53.7
Intervention	41	Female	Farming	Yes	15.8	29.9	22.7	58.6	77.7	65.6
Intervention	43	Male	Farming	Yes	22.5	23.1	35.9	66	54.5	49.6
Intervention	29	Male	Farming	Yes	19.9	24.9	26.5	39.1	63.2	74.5
Intervention	41	Female	Farming	Yes	22.5	26.9	33.5	56.1	62.8	79.8
Intervention	42	Male	Farming	Yes	19.9	36.6	34.3	62	73.2	66.8
Intervention	29	Female	Farming	Yes	22.4	34.4	22.8	23	86.5	80.2
Intervention	62	Male	Farming	Yes	29	27.7	29.7	36.4	65.3	76.6
Intervention	44	Female	Pastoralism	Yes	19.2	29	31.8	45.3	78.8	77.2
Intervention	23	Male	Farming	Yes	23.5	24.5	26.8	56.3	70	54.8
Intervention	47	Male	Farming	Yes	18.6	24.4	23.5	51.9	54.9	71.8
Intervention	26	Female	Pastoralism	No	20.8	34.2	35.2	49.2	68.7	73.8
Intervention	48	Female	Farming	Yes	23.4	33.5	31.8	48.1	72.6	59.6
Intervention	53	Female	Farming	Yes	22.6	28.7	29.3	39.3	60.4	73.3
Intervention	28	Female	Farming	Yes	24.3	37	24.8	28.9	78.6	34.6
Intervention	51	Male	Farming	Yes	25.4	31.5	24.9	49.6	69.2	63.6
Intervention	43	Female	Farming	Yes	24.2	30.6	29.8	45.6	53.1	72.5
Intervention	49	Female	Pastoralism	Yes	25.3	30.6	27.2	47.9	62.1	49
Intervention	63	Female	Farming	Yes	22.3	25.7	30	45.2	66.4	62.8
Intervention	35	Female	Farming	Yes	18.3	33.5	30.6	55.6	81.5	75.8
Intervention	28	Female	Other	Yes	24.8	33.5	27.2	32.8	63.6	61.1
Intervention	27	Male	Farming	Yes	19.8	30.7	36	51.9	88.5	57.2
Intervention	28	Male	Farming	Yes	24.3	25.4	26	30.9	88	52.7
Intervention	37	Male	Farming	Yes	16.1	34	25.2	51.2	70.3	60.4
Intervention	43	Female	Other	Yes	19.9	22.8	30.8	52.3	84.1	62.8
Intervention	42	Female	Farming	Yes	18.5	26.8	31.1	34.1	60	66
Intervention	49	Female	Farming	No	23	32.1	25	61.2	67.5	90.6
Intervention	38	Male	Farming	No	19	28.2	27.7	56.6	52	62.6
Intervention	57	Male	Farming	No	21.3	25.9	22.8	42.4	72.4	55.5
Intervention	35	Female	Farming	Yes	20.8	35.2	26.8	42.4	62.4	79.8
Intervention	73	Female	Farming	Yes	25.7	34.2	32.4	47	81.1	54.9
Intervention	46	Male	Farming	Yes	23.4	34	23.8	35.1	72.5	53.6
Intervention	27	Female	Other	No	22.6	31.1	24.6	42.7	61.3	46.5
Intervention	24	Male	Pastoralism	Yes	21.5	29.9	25.7	61.2	59.4	53.3
Intervention	44	Male	Pastoralism	Yes	18.2	36.6	33.8	63.1	87.3	36.6
Intervention	35	Female	Farming	Yes	17.7	35.4	33.2	67.1	52.5	59.1
Intervention	47	Female	Farming	Yes	22.6	29.5	20.5	56.9	53	46.4
Intervention	44	Female	Farming	Yes	15.5	40	21.8	49.1	62.1	51.1
Intervention	37	Male	Farming	Yes	21.2	29.3	29.5	42.2	65	59.1
Intervention	27	Male	Farming	Yes	21.9	31.3	22.5	39	51.1	68.5
Intervention	19	Male	Farming	Yes	15.5	35.2	34	46.2	79.4	49.3
Intervention	32	Male	Farming	Yes	21.2	31.2	20.1	55.7	69.4	38.5
Intervention	49	Male	Farming	Yes	21.4	28.8	26	48.1	98	65.1
Intervention	41	Male	Farming	Yes	30.1	31.3	30	44	82.8	74.6
Intervention	22	Male	Farming	Yes	21.4	29.8	35.1	73.3	52.5	70.3
Intervention	40	Male	Pastoralism	Yes	25.1	21.5	29.1	30.7	73	72.2
Intervention	43	Female	Farming	Yes	23.3	33.7	30.4	54.5	60.3	76.2
Intervention	27	Female	Other	No	22.5	27.4	29.8	23.9	57.3	61.4
Intervention	40	Female	Pastoralism	Yes	24.9	25.3	33	43.6	59.1	64.6
Intervention	39	Male	Pastoralism	Yes	15.3	34.5	30.4	37	59.2	57.8
Intervention	23	Male	Other	Yes	21	31.3	32.1	46.7	57.1	53.7
Intervention	43	Male	Farming	Yes	22.6	32.5	32.2	46.8	57.8	60
Intervention	45	Male	Farming	Yes	17.4	29.3	33.6	35.3	83.1	60
Intervention	52	Male	Pastoralism	Yes	21.2	30.7	20.2	38.5	72.1	70.1
Intervention	52	Male	Farming	Yes	21.8	28.6	22.9	37.2	61.1	44.2
Intervention	20	Female	Farming	Yes	20.7	26.4	31.9	76.5	66.5	47.5
Intervention	26	Female	Farming	Yes	17.7	32.5	37.2	32.5	77.8	74.7
Intervention	45	Male	Farming	Yes	18.2	30.7	30.4	53.4	66.5	63.8
Intervention	45	Female	Other	Yes	20.1	36.5	28	22.7	50.9	64.1
Intervention	45	Male	Farming	Yes	23	21.1	33.1	45.6	75	45.5
Intervention	80	Female	Farming	No	21.8	34.4	34.5	63.5	65.8	63.5
Intervention	45	Female	Other	Yes	22.2	28.3	31.9	62.2	62	58.5
Intervention	53	Female	Farming	Yes	20.4	27.9	29	47.8	55.5	64.4
Intervention	50	Male	Other	Yes	17.9	32.1	29.3	56.5	99.5	60.5
Intervention	47	Male	Other	Yes	20.1	26.3	30.2	47.5	54.5	48.8
Intervention	34	Male	Pastoralism	Yes	17.9	28	34.5	48.1	61.5	60.9
Intervention	48	Male	Farming	Yes	8.7	32.1	30.8	32	69.6	78.8
Intervention	28	Female	Pastoralism	Yes	21.3	27.7	30.9	33.7	62.4	53.9
Intervention	35	Female	Farming	Yes	20.3	27	33	45.9	77.4	53.2
Intervention	32	Female	Farming	Yes	26.6	27	28.9	62.6	66.1	76.7
Intervention	39	Female	Farming	Yes	24.3	31.2	30.2	61	72.1	42.8
Intervention	68	Female	Farming	Yes	23.4	25.1	37.2	34.1	65.5	63.7
Intervention	18	Male	Farming	Yes	17.2	32.7	26.5	48.7	87.1	54.9
Intervention	47	Male	Farming	Yes	25.7	38.1	26.8	67.7	58.7	74.3
Intervention	18	Female	Farming	No	22	29.8	25.6	57.8	54.1	57.1
Intervention	32	Male	Farming	Yes	19.9	31.5	30.4	49.7	66.1	52
Intervention	52	Male	Pastoralism	Yes	18.1	30.8	30.6	38.7	72.2	53.4
Intervention	39	Male	Pastoralism	Yes	18.6	26.2	21.2	51.9	64.2	80.3
Intervention	24	Female	Farming	Yes	20.3	31	33.1	58.8	70.1	67.3
Intervention	29	Female	Farming	Yes	17.1	30.7	24.7	46.3	64.1	82
Intervention	47	Male	Farming	Yes	21.6	36.7	30.9	52.1	67	60.7
Intervention	29	Female	Farming	No	20.7	30.8	29.6	37.8	63.7	66
Intervention	41	Female	Farming	Yes	24.3	34.6	17.5	55	59.6	46.1
Intervention	39	Female	Pastoralism	Yes	20.8	31.5	19.4	46.8	55.9	62.2
Intervention	30	Female	Farming	Yes	13.8	27.8	24.5	39.8	59.5	64.2
Intervention	66	Female	Farming	Yes	20.1	25.2	33.9	60.8	61	81.2
Intervention	46	Female	Pastoralism	Yes	16.7	31	21.4	63.3	80.8	70.4
Intervention	18	Male	Farming	Yes	18.9	32.8	33.7	25.5	54.4	52
Intervention	41	Male	Farming	Yes	17.4	29.5	21.9	43.1	60	55.6
Intervention	30	Male	Other	Yes	30.2	27.3	20.1	40.9	69.1	49
Intervention	49	Male	Farming	Yes	20	35.3	30.3	45.9	74.8	62.4
Intervention	28	Male	Farming	No	24.4	28.1	29	54.7	71.9	68.5
Intervention	37	Male	Pastoralism	Yes	20.1	25.3	21.9	29.2	52.9	74.9
Intervention	45	Male	Farming	Yes	20.4	29.5	24.2	60.4	76.6	64.1
Intervention	49	Male	Farming	Yes	19.4	30.1	30.4	39.3	73.1	52.1
Intervention	23	Male	Farming	Yes	18.5	26.9	27.6	38.3	57.2	54.7
Intervention	34	Female	Farming	Yes	18.6	29.4	31.6	53.5	59.8	69.9
Intervention	32	Female	Farming	Yes	23	23.2	27.7	64.6	62.4	76.3
Intervention	30	Female	Farming	Yes	21.1	31.5	33.1	53.2	68.5	60.2
Intervention	61	Male	Pastoralism	No	27	25.7	24.4	48.8	85.2	70.2
Intervention	43	Male	Pastoralism	Yes	20.5	28.3	31.5	39.2	83.3	54.1
Intervention	22	Male	Farming	Yes	20.2	27.2	23.9	48	83.4	58
Intervention	50	Male	Farming	No	21.6	35.3	30.4	42	65.3	66.3
Intervention	65	Female	Farming	Yes	23.9	28.6	31.7	31	69.6	65.3
Intervention	51	Male	Pastoralism	Yes	21.9	26.5	24.7	50	66.6	68.2
Intervention	19	Female	Farming	Yes	27.1	38	30.6	60.4	63.9	63.7
Intervention	32	Female	Farming	Yes	32.2	36.8	31.4	44.8	58.1	69.8
Intervention	54	Male	Farming	Yes	24.8	33.1	31.1	69.2	86.4	56.6
Intervention	29	Male	Farming	Yes	23	32	26	43.1	64.8	88.2
Intervention	44	Male	Farming	Yes	13	26.4	27.6	37.4	50	76.8
Intervention	48	Male	Farming	Yes	27.2	34	36.1	76.5	63.7	67.8
Intervention	26	Female	Farming	Yes	26.6	31.2	25.5	49.3	67	66.9
Intervention	37	Female	Farming	No	27.8	27.3	29.7	45	69	64.4
Intervention	18	Female	Other	Yes	24.7	30.3	28.3	49.4	67.6	61.6
Intervention	25	Female	Farming	Yes	17.4	28	30.5	49.6	56.9	77.8
Intervention	35	Male	Farming	Yes	17.3	23.9	34.9	41.6	86.2	70.4
Intervention	22	Male	Farming	Yes	16.8	35.1	26.7	49	63.8	56.6
Intervention	59	Male	Farming	No	21.7	22.7	30.6	41.7	73.9	64.5
Intervention	20	Male	Farming	Yes	18.5	38.2	32	32.7	69.6	70.1
Intervention	32	Male	Farming	Yes	25	29	27.7	40.6	54.3	67.4
Intervention	40	Female	Other	No	19	31.6	25.6	36.6	63.7	56.6
Intervention	57	Male	Farming	Yes	20	31.9	29.5	46.7	75.1	54.4
Intervention	20	Female	Farming	Yes	22.5	25.9	29.2	40.3	61.6	73.1
Intervention	53	Female	Farming	Yes	19.4	29	22.4	69.7	65.7	66.2
Intervention	38	Male	Farming	Yes	17.6	29.4	25.9	51	67.7	58.9
Intervention	25	Female	Farming	Yes	13.8	27.4	32.1	22.8	62	89.3
Intervention	44	Male	Pastoralism	Yes	25.3	33.8	27.3	31.6	71.2	71.2
Intervention	41	Male	Farming	Yes	17.5	25.1	31	48.7	63.5	63.1
Intervention	30	Female	Pastoralism	Yes	19.8	30.6	24.8	55.3	62.2	60.2
Intervention	39	Male	Farming	Yes	19.8	23.1	29.6	52.4	78.7	74.9
Intervention	33	Female	Pastoralism	Yes	12.7	30.7	29.6	54.1	72	78.5
Intervention	40	Female	Pastoralism	Yes	22.6	30.5	30.3	39.1	55.4	56.1
Intervention	47	Female	Farming	Yes	27.3	37.2	27.6	72.7	59.2	53.6
Intervention	59	Female	Pastoralism	Yes	25.4	27.4	29.8	40.1	68.7	65.1
Intervention	22	Female	Farming	Yes	19.8	29.1	36.9	58.8	75.8	61
Intervention	66	Male	Farming	Yes	25.8	28.9	30.8	30.3	56.5	51.7
Intervention	18	Male	Farming	Yes	14.1	36.4	35.1	30.2	75.1	58.3
Intervention	36	Male	Farming	Yes	24.9	27.6	28.4	53.2	74.1	55.9
Intervention	46	Male	Pastoralism	Yes	18.3	30.7	18.5	56.8	70.5	57.3
Intervention	42	Female	Farming	No	25.5	28.7	32.2	37.6	56.6	72.7
Intervention	30	Male	Farming	Yes	21.5	29.2	37.2	61.5	58	72
Intervention	35	Female	Farming	Yes	16.3	29.8	29.7	53.1	68.1	93.9
Intervention	32	Female	Farming	Yes	22.4	34.1	26.8	50.9	73.5	46.4
Intervention	30	Male	Other	No	21.4	35.5	29.5	52.7	70.5	71.6
Intervention	49	Male	Pastoralism	Yes	22.4	24.4	33.9	50.4	61.4	76.6
Intervention	43	Male	Farming	Yes	18	32.8	29.7	35.9	69.4	49.1
Intervention	29	Male	Farming	Yes	16.5	34.7	26.3	68.1	98.2	39.1
Intervention	50	Female	Farming	Yes	24	31.1	25.1	58.1	48.7	52.9
Intervention	42	Male	Farming	Yes	21.1	34.4	32	46.8	63.3	51.2
Intervention	49	Female	Farming	Yes	23.8	24.9	40	61.2	55.8	58.4
Intervention	46	Male	Farming	Yes	23.7	31.8	24.3	67.2	63.9	77.4
Intervention	27	Female	Other	No	24.4	34.7	31.7	60	72.7	46.9
Intervention	31	Female	Farming	Yes	28.2	27.3	31.9	53.9	51.3	58.8
Intervention	48	Male	Farming	Yes	22.2	24.8	24.5	39.9	71.7	62
Intervention	46	Male	Other	No	17.2	34.3	32.4	40.3	66	76.8
Intervention	38	Female	Farming	Yes	18.2	28.2	37.4	25.3	55.3	65.6
Intervention	40	Female	Farming	Yes	20.2	27.5	33	51.2	65.5	67.3
Intervention	55	Male	Farming	Yes	22.3	22.5	27.6	47.6	54.2	68.3
Intervention	30	Male	Farming	Yes	27.2	27.8	23.5	20.3	63.7	56
Intervention	45	Male	Farming	Yes	20.8	27.1	30.9	19.2	74.8	64
Intervention	35	Male	Farming	Yes	28.5	22.8	28.5	68.5	51.9	67.3
Intervention	35	Male	Farming	Yes	28.8	27.5	31.8	27.3	62.9	59
Intervention	52	Male	Other	Yes	23.2	34.4	27.9	54.3	81.9	52.6
Intervention	49	Female	Farming	Yes	24	31.1	25.4	30	66.1	67.4
Intervention	49	Male	Farming	No	19.5	23.4	29.4	64.9	74	57.9
Intervention	55	Male	Farming	No	28.5	31.3	33.9	55.8	62.8	74.2
Intervention	38	Male	Farming	No	18.7	32.6	32.4	54.5	52.6	46.6
Intervention	47	Female	Farming	Yes	26.4	30.2	27.9	36.4	47.1	71.2
Intervention	34	Male	Farming	Yes	17.1	29.7	24.3	53.1	60.8	66.3
Intervention	42	Female	Farming	Yes	24.1	26.7	27.9	42.9	89.1	69.3
Intervention	36	Male	Other	Yes	26.1	31.4	27.8	29.7	64.1	49.3
Intervention	39	Male	Farming	Yes	25.2	32.1	28.9	44	59.4	54.9
Intervention	46	Male	Farming	Yes	19.4	30.9	37.2	38.1	68	76.4
Intervention	28	Female	Pastoralism	Yes	20.3	36.6	27.8	36.5	58.7	74.9
Intervention	65	Female	Farming	Yes	27.9	29	29.6	51.1	66	88.8
Intervention	25	Female	Farming	Yes	19.3	24.7	32.3	30.2	68.3	64.5
Intervention	22	Female	Other	Yes	19.4	36.3	31.2	65.9	50.9	64.8
Intervention	53	Female	Farming	Yes	27.7	22.4	35.1	58.3	80.5	69.5
Intervention	48	Male	Farming	Yes	21.1	28.2	26.9	45	66.5	65.4
Intervention	46	Female	Farming	No	21.2	26.2	26.4	67	82	61.2
Intervention	46	Female	Farming	No	29.1	29.4	27.6	38.4	58.5	70.5
Intervention	38	Male	Farming	Yes	18.7	29.3	25.3	50.7	57.5	57
Intervention	27	Female	Farming	No	18.3	26.1	29.3	52.5	59.9	76.5
Intervention	39	Female	Farming	Yes	22.2	34	29.7	33.2	57.1	47.4
Intervention	29	Male	Farming	Yes	21.5	29.3	27.7	59	79.3	61.4
Intervention	51	Male	Other	Yes	18.1	34.6	31.3	37.8	67.9	45.8
Intervention	36	Male	Farming	Yes	24.8	25.2	31.5	56.4	74.4	66.4
Intervention	27	Male	Farming	Yes	21.5	25.6	26.1	49.4	68.6	69.7
Intervention	34	Male	Other	Yes	21.7	25.5	31.5	38.9	71.7	70.3
Intervention	43	Male	Farming	Yes	21.4	31.8	24.4	45.6	65.2	51
Intervention	31	Male	Farming	Yes	17	36.6	25.3	53.7	67.3	70.3
Intervention	27	Male	Farming	Yes	18	28.6	35	55.9	68.4	58.1
Intervention	41	Female	Other	Yes	14.8	20.8	28.2	26.5	70.8	56.4
Intervention	41	Male	Pastoralism	Yes	26.2	31.7	28.3	53.9	60	49.8
Intervention	32	Male	Other	No	21.4	32.4	35.9	37.5	62.8	47.8
Intervention	32	Male	Farming	No	25.6	25.8	29.8	32.7	70.2	68.4
Intervention	41	Female	Farming	Yes	19.5	32	28	47.2	75.8	58.8
Intervention	19	Male	Farming	Yes	26.2	33	25.4	36.3	85.6	58.9
Intervention	20	Male	Other	Yes	14.6	21.8	31	47.3	61	60.9
Intervention	29	Male	Farming	Yes	25.5	34.2	35	38.5	60.2	64.3
Intervention	35	Female	Farming	Yes	21.1	34.4	28.8	51.4	46.8	50.8
Intervention	42	Female	Farming	Yes	15.6	28.6	34.4	57.9	72.5	64.1
Intervention	57	Male	Farming	Yes	9.5	32.3	28.5	61.7	72.2	57.6
Intervention	49	Male	Farming	Yes	23.5	37.5	26	38.8	52.5	82.6
Intervention	36	Male	Farming	Yes	25.6	27.2	27.1	43.7	66.4	69.9
Intervention	38	Male	Farming	Yes	21.7	34.3	26	35.4	79.6	64.7
Intervention	25	Female	Farming	No	23.9	30.8	34.7	40.8	58.5	36.9
Intervention	38	Male	Farming	Yes	23.3	25.4	33.7	38.7	66.8	38.3
Intervention	34	Female	Farming	Yes	21.6	22.7	30.7	52.9	62.9	46.1
Intervention	42	Male	Farming	Yes	25.4	32.6	19.4	46.2	68.3	88
Intervention	27	Female	Farming	Yes	15.2	24.7	35.2	47.8	80.9	74.1
Intervention	45	Male	Other	Yes	21.8	33.6	27.5	58.8	75.3	61.8
Intervention	58	Male	Farming	Yes	24.3	21.3	26.6	58.7	49.5	74.4
Intervention	37	Female	Farming	Yes	19.5	30.4	27.7	41.7	76.3	69.1
Intervention	43	Male	Farming	Yes	22.5	28.6	29.3	7.2	67.9	79.7
Intervention	47	Female	Farming	Yes	16.5	36.3	30.9	59.8	64.5	59.5
Intervention	33	Female	Farming	Yes	21.7	30.7	33.6	58.7	81.4	66.6
Intervention	41	Male	Other	Yes	18.4	32.2	31.3	39.5	56.3	61.7
Intervention	38	Female	Farming	Yes	19.2	28.1	29.2	51.7	71.1	71.4
Intervention	39	Male	Pastoralism	No	23.8	29.1	27.6	68.3	59.2	66.5
Intervention	28	Male	Other	Yes	14	33.9	25.5	68.7	66.6	59.7
Intervention	38	Female	Farming	Yes	16.8	29.9	30.7	34.6	55	70.8
Intervention	45	Female	Farming	Yes	24.4	26.2	31.3	43.8	60.6	68.3
Intervention	57	Male	Farming	Yes	20.7	34.2	26	27.2	72.6	67.8
Intervention	50	Female	Farming	Yes	18.3	36.4	24.8	42.5	56.8	63.9
Intervention	66	Female	Pastoralism	No	23.3	35.7	32.3	40.7	58	47.3
Intervention	28	Male	Farming	Yes	16.7	34.8	27.4	17.2	63.4	67.2
Intervention	49	Female	Farming	Yes	16.6	28.7	24.3	60.9	81.4	37.6
Intervention	40	Female	Farming	Yes	20.5	26	25.2	65.5	48.9	50.6
Intervention	66	Female	Farming	Yes	20.8	25.2	31.2	63.3	34.8	78.4
Intervention	28	Male	Farming	Yes	18.3	24.7	35.5	60	61.9	50.7
Intervention	27	Female	Farming	Yes	20.3	29.4	33.3	27.6	47.6	68.4
Intervention	30	Male	Pastoralism	Yes	27	36.7	21.4	71.1	67.9	80.8
Intervention	18	Female	Farming	Yes	21.2	23.3	28.7	48.9	61.5	66.9
Intervention	31	Female	Farming	No	16.6	29.9	32.4	53.7	58	66.9
Intervention	28	Male	Farming	No	21.5	28.6	23	61.1	79	50.6
Intervention	40	Male	Pastoralism	Yes	12.5	25.2	35.7	54.4	65.5	79.1
Intervention	43	Female	Other	Yes	28.2	28.8	21.7	68.3	80.3	62.1
Intervention	62	Female	Pastoralism	Yes	16.4	34.8	31.6	39.4	75	67.7
Intervention	50	Male	Farming	Yes	22.3	30.7	27.7	65.8	37.1	66.9
Intervention	31	Male	Farming	Yes	22.1	32.2	30	30.4	61.2	54.3
Intervention	27	Female	Farming	Yes	18.1	34	29.5	53.3	48.6	74.2
Intervention	44	Male	Farming	Yes	26.9	31.3	25.5	41.8	67.8	78
Intervention	21	Male	Other	No	30	28.4	31.3	51	73.3	78.9
Intervention	62	Female	Farming	Yes	18.3	30.2	28.2	63.5	73.9	40.3
Intervention	53	Male	Farming	Yes	24.4	25.6	31.5	60.9	59.3	61.9
Intervention	32	Male	Pastoralism	Yes	17.3	30	26.4	48.4	78.2	53.1
Intervention	18	Male	Farming	Yes	26.9	30.3	28.1	33.5	56.4	75.7
Intervention	56	Female	Farming	Yes	26.7	34.9	31.4	33.5	62.2	76.2
Intervention	37	Male	Farming	No	25.6	28.5	26.1	63	63.8	77.3
Intervention	54	Female	Farming	Yes	14.4	28.5	33.9	49.7	93.9	58.3
Intervention	18	Female	Farming	Yes	19.1	23.9	30.3	40.3	62.1	78.1
Intervention	30	Male	Pastoralism	Yes	19.2	32.3	37.2	36.9	61.3	69.7
Intervention	38	Female	Farming	Yes	18.9	24.1	28.4	55.3	69.2	61.7
Intervention	39	Male	Farming	Yes	27	27.9	30.2	69.9	55.7	79.2
Intervention	32	Female	Farming	No	13.8	27	28.2	45.4	71.2	72.2
Intervention	46	Male	Farming	Yes	23	33.3	29.1	60.2	54	39.4
Intervention	24	Female	Farming	Yes	24.5	31.7	31.4	34.8	49.6	46.1
Intervention	36	Male	Pastoralism	Yes	18.4	32.6	35.7	57.6	65	55.7
Intervention	40	Male	Farming	Yes	23.5	33.5	35	66.9	76.4	65.8
Intervention	45	Female	Farming	Yes	23.3	27.3	32.3	39.4	47.4	81.5
Intervention	47	Male	Farming	Yes	20.3	26.4	24.7	58.2	66.1	79.4
Intervention	24	Female	Farming	Yes	26	23.2	27.6	50.9	56.2	60.7
Intervention	18	Male	Farming	Yes	19.1	30.3	31.5	47.7	72.1	63.4
Intervention	55	Male	Farming	Yes	26	26.7	25.8	30.6	69.7	48
Intervention	42	Female	Farming	Yes	22	31.6	29	33.7	63.6	75.1
Intervention	28	Male	Farming	Yes	20.1	34.3	29.8	53.1	67.6	67.5
Intervention	58	Female	Farming	Yes	20.5	33.4	36.6	46.5	87.3	61.3
Intervention	40	Male	Pastoralism	Yes	15.6	30.3	28.5	52.2	81.3	57.5
Intervention	53	Male	Farming	Yes	19.9	30.1	22.6	65.1	55.6	70.4
Intervention	39	Female	Farming	Yes	16.7	29.8	32.3	30.9	55.6	69.3
Intervention	65	Male	Farming	Yes	22.5	38.1	33.4	65.1	64.8	67.9
Intervention	61	Male	Farming	Yes	25.2	27.5	38.4	34.9	48.7	90.2
Intervention	35	Female	Farming	Yes	23.3	30.1	27.3	45.8	64.2	71.8
Intervention	51	Male	Pastoralism	Yes	18.4	29.1	23.5	41.7	78.2	63.2
Intervention	46	Male	Pastoralism	Yes	20.3	26.7	30.5	36.9	73.9	79.9
Intervention	56	Female	Farming	Yes	22.6	28.3	31.2	72.5	66.3	43.8
Intervention	26	Female	Farming	No	22.8	29.9	31.5	50.6	77.1	76.3
Intervention	47	Male	Farming	No	28.3	25.2	27.4	66.3	58.4	67.4
Intervention	52	Female	Farming	No	24	36.2	30.9	35.3	88.2	65.7
Intervention	18	Female	Farming	Yes	22	32.6	29.5	47.2	62.6	62.8
Intervention	23	Male	Other	Yes	21.8	34.1	26.8	33.2	60.6	64.5
Intervention	18	Male	Farming	Yes	19.9	29.2	24.6	29.4	54.3	58.8
Intervention	35	Female	Farming	Yes	21.4	28.6	27.8	53.1	64.6	62
Intervention	47	Male	Farming	Yes	24.4	29	28.8	49.4	83.4	46.1
Intervention	57	Female	Farming	Yes	18.4	27.1	31.9	58.2	78.3	60.8
Intervention	39	Female	Farming	Yes	23.1	34.9	29	78.3	54.5	61.8
Intervention	59	Female	Pastoralism	Yes	20.9	35.2	27	33.3	92.5	65.1
Intervention	20	Female	Farming	Yes	28.6	31.9	31.3	42.8	66.4	58
Intervention	18	Male	Farming	Yes	22.6	36.4	28.8	55.2	57	77.2
Intervention	37	Male	Other	No	22.8	39.1	26.3	38.6	73.8	63.8
Intervention	43	Female	Other	Yes	17.8	37	30.5	51.9	74.2	68.1
Intervention	38	Male	Pastoralism	Yes	27.6	28	31.8	42.4	64.7	57.2
Intervention	18	Female	Farming	Yes	23.5	20.4	28.7	43.3	59.6	62.7
Intervention	37	Male	Other	Yes	27.1	32.7	35.9	34.7	69.3	68.9
Intervention	21	Female	Pastoralism	Yes	20.6	31.5	34.2	52.8	67.9	76.7
Intervention	47	Female	Pastoralism	Yes	21.4	30.2	31.2	51.8	62.1	73.6
Intervention	43	Male	Other	Yes	15.6	28.9	27.6	45.3	80.6	54.1
Intervention	26	Male	Other	Yes	29.1	35.1	21.6	56.1	77.7	63.3
Intervention	31	Female	Farming	Yes	23	23.8	24.1	42.5	86.3	68.8
Intervention	24	Male	Farming	Yes	29.2	35.8	32.7	78.3	67.2	50
Intervention	37	Female	Farming	Yes	19.9	36.6	25.3	60.5	64.2	52.5
Intervention	50	Female	Farming	Yes	23.4	30.4	30.8	59	74.3	62.2
Intervention	25	Male	Farming	Yes	25.6	30.9	25.4	29.6	65.7	54.5
Intervention	45	Female	Farming	Yes	22.8	25.2	28.4	47.4	66.7	91.1
Intervention	31	Male	Farming	Yes	20	33.7	27.1	39.8	74	56.2
Intervention	28	Male	Farming	Yes	19.4	34.8	32.5	43.1	56.9	73.9
Intervention	37	Male	Farming	Yes	19.9	32.8	32.8	51.6	59.7	70.9
Intervention	25	Female	Farming	Yes	32.6	25	22.5	45.3	87.2	68.8
Intervention	31	Female	Farming	Yes	18.8	23.5	34.6	45.6	77.4	51.1
Intervention	23	Male	Other	Yes	13.1	28.9	28	62.8	35.6	65.5
Intervention	63	Male	Farming	Yes	21.6	30.1	33.6	39.2	57.6	95.7
Intervention	39	Male	Farming	Yes	21.5	33.8	34.5	48.2	83.3	66.8
Intervention	29	Female	Farming	No	20.1	28.9	26.8	38.8	59.2	62.2
Intervention	41	Male	Farming	Yes	18.8	33.9	35.7	38.9	63.4	58.3
Intervention	37	Female	Pastoralism	Yes	20.2	34.2	21.8	45.6	57.8	53.3
Intervention	35	Male	Farming	Yes	15.9	31.6	24.9	62.7	70.9	69.5
Intervention	46	Female	Farming	Yes	28.9	33.2	27.4	33.1	51.3	72.7
Intervention	48	Female	Pastoralism	Yes	22.4	28.2	24.9	46.1	59.8	77.1
Intervention	31	Female	Other	Yes	21.9	25.3	23.2	47.7	70	52.8
Intervention	31	Male	Farming	Yes	25.8	27.6	33.3	28.9	91	63.4
Intervention	35	Male	Farming	No	32.8	26.6	27.3	39.2	61.8	70.8
Intervention	18	Female	Farming	Yes	19.7	34.5	29.4	57.4	62.7	41.1
Intervention	19	Female	Farming	No	22.7	33.2	31.9	53.2	100	69.2
Intervention	56	Male	Pastoralism	Yes	24.8	21.9	33.6	53	44.1	46.8
Intervention	59	Female	Other	Yes	24.3	30.5	35.5	51.6	63.9	51.9
Intervention	35	Male	Farming	Yes	25.2	22.8	25.5	73.3	53.7	69.1
Intervention	46	Male	Pastoralism	Yes	25.3	25.6	35.4	50.2	55.6	50.2
Intervention	42	Male	Farming	Yes	19.7	33	29.8	35	71.7	50.7
Intervention	78	Female	Farming	Yes	26.4	23.1	29.8	34.6	62.4	87
Intervention	53	Female	Farming	No	20.9	24.5	28	45.7	74.6	45.7
Intervention	36	Male	Pastoralism	No	22.6	25.8	30.4	44.3	71.9	79.1
Intervention	26	Male	Pastoralism	Yes	24	23.6	35.4	41.8	50.4	70.1
Intervention	18	Female	Farming	Yes	18.4	24.3	31.8	57.4	49.1	72
Intervention	41	Male	Farming	Yes	23.2	29.6	33.6	65.7	74	88.2
Intervention	28	Female	Farming	Yes	24	23.2	25.5	46.2	47.6	59.6
Intervention	20	Female	Pastoralism	Yes	13.4	28.8	27.3	34	56.3	77.6
Intervention	30	Male	Farming	Yes	27.3	29.8	29.4	54.3	68.3	35.7
Intervention	24	Male	Farming	Yes	18	32.7	31.2	44.9	75.4	78.6
Intervention	60	Female	Farming	Yes	22.5	33.4	30.5	46.1	64.7	60
Intervention	49	Male	Farming	Yes	27.8	24.4	36.5	43.5	78.4	64.3
Intervention	38	Male	Farming	Yes	24.1	24.6	26.4	41.9	58.7	59.4
Intervention	57	Male	Other	Yes	25.8	24.4	31	31	71.7	60.5
Intervention	39	Male	Farming	Yes	26.1	32.9	31.2	46	61	41.2
Intervention	27	Female	Farming	Yes	19.3	31.1	27.5	44.8	74	77.7
Intervention	58	Female	Farming	Yes	17	28.4	28.8	38.9	62.3	64
Intervention	45	Female	Farming	Yes	23.1	25.2	26.4	29.3	62.8	38.9
Intervention	25	Male	Farming	No	24.4	30.4	30.3	57.2	75.2	68.9
Intervention	36	Male	Farming	Yes	26	35.1	23.7	32.2	69.5	48.8
Intervention	27	Female	Farming	Yes	24.7	34.9	36	48.7	54.1	78.5
Intervention	20	Female	Farming	Yes	19.3	24.1	28.1	53.9	92.6	73.1
Intervention	50	Female	Farming	Yes	25.1	34	26.2	29.1	43.4	42.9
Intervention	63	Male	Farming	Yes	12.6	24	22	41.6	48.7	67.9
Intervention	20	Female	Farming	Yes	26.7	28.2	27.6	58.7	79.3	51.3
Intervention	45	Male	Farming	Yes	17.7	27.8	28.1	42.7	77.5	67.4
Intervention	30	Female	Farming	No	17.6	30.8	30.4	21.7	70.4	69.2
Intervention	32	Female	Farming	No	31.9	25.9	28.2	55.2	62.1	64.7
Intervention	30	Female	Farming	No	21.6	30.2	40	42.8	62.3	73.7
Intervention	27	Female	Farming	Yes	20.3	25.6	23.9	46	67.2	95.3
Intervention	39	Female	Pastoralism	Yes	16.6	30.5	31.6	44.7	63.7	68.3
Intervention	27	Male	Farming	Yes	23.3	24.7	30.8	57.6	58	84.6
Intervention	42	Male	Farming	Yes	24.7	28.2	23.6	65.3	68.6	75.2
Intervention	37	Female	Farming	Yes	19.9	29.8	27.8	70.1	74.1	73.3
Intervention	35	Male	Farming	Yes	12.4	28.8	38.7	65.1	63.6	65.8
Intervention	26	Male	Farming	Yes	28.2	33.1	27	45.9	74.9	59.1
Intervention	31	Male	Farming	Yes	20.2	21	37.4	50.6	63.4	68.7
Intervention	48	Male	Pastoralism	No	20.1	30.5	28.6	24.6	61	73.5
Intervention	45	Female	Farming	Yes	21.3	26.6	29.2	56.8	67.2	49.3
Intervention	25	Male	Farming	Yes	18	32.1	27.6	42.4	82.5	55.5
Intervention	39	Female	Farming	Yes	26.8	29.9	25	30	71.4	59.5
Intervention	48	Female	Farming	Yes	24.5	34	24.1	64.6	80.9	70.5
Intervention	18	Male	Pastoralism	Yes	23.4	28.9	26.6	57.1	62.4	81.9
Intervention	45	Female	Farming	No	31.1	34.6	32.2	66.9	69.4	53.8
Intervention	30	Male	Farming	Yes	18.5	30.4	31.3	40.4	76.3	56.2
Intervention	45	Female	Farming	Yes	26.8	24.8	27.6	27.8	58.8	51.3
Intervention	28	Male	Other	Yes	12.1	26.6	36.8	65.8	49.3	54.7
Intervention	18	Male	Farming	Yes	24.1	27.5	25.6	40.4	52.2	61.5
Intervention	18	Male	Farming	No	30.9	30.2	31	46.9	75.4	70.3
Intervention	39	Male	Farming	Yes	17	33.3	23.7	66	87.2	64.3
Intervention	41	Female	Farming	Yes	28.3	32.2	30.3	34.4	58.1	63.1
Intervention	26	Male	Farming	No	15.6	32.4	31.2	43.1	57.1	78.7
Intervention	46	Female	Farming	Yes	30.1	26.9	28.3	36.5	91.9	61.2
Intervention	18	Male	Pastoralism	No	19.5	33.2	29.3	47.6	41.1	62.8
Intervention	37	Female	Farming	Yes	18.3	30.2	27.1	46.6	78.7	66.4
Intervention	22	Female	Farming	Yes	19.2	32.9	32.9	36.4	71.2	64.2
Intervention	30	Male	Pastoralism	Yes	21.5	24	32.7	45.6	66.5	62.8
Intervention	39	Male	Other	Yes	20.8	31.6	30.9	54.9	67.2	54.1
Intervention	27	Female	Farming	Yes	21.2	27.4	32	56.6	67.9	50.1
Intervention	33	Male	Farming	Yes	22.7	24.9	31.4	51.2	67.1	67.8
Intervention	51	Male	Pastoralism	Yes	22.4	32.3	27.4	51.2	70.8	55.2
Intervention	31	Female	Farming	Yes	21.4	28.1	30.6	29.8	46.5	56.1
Intervention	49	Female	Farming	Yes	19.5	31.9	32.2	63	68.2	55.8
Intervention	24	Female	Farming	No	23.2	26	28.3	52	74.7	71.5
Intervention	45	Female	Farming	Yes	23	37.7	31.4	64.2	54.5	53.5
Intervention	57	Female	Pastoralism	Yes	22.8	29.3	23.7	54.4	74.1	44.6
Intervention	18	Female	Farming	Yes	21.4	28	24.2	59.8	67.8	62.7
Intervention	28	Female	Farming	Yes	18.5	33.7	29.4	35.3	57.6	57.4
Intervention	46	Male	Farming	Yes	21.7	29.5	27.8	83.7	55	60.9
Intervention	35	Female	Farming	Yes	20.2	40	33.6	51.3	53.9	68.9
Intervention	43	Male	Pastoralism	Yes	12.7	34.3	28.3	59.4	51.5	72.5
Intervention	30	Male	Farming	No	25.6	28	33.8	55.3	52.5	51.6
Intervention	39	Female	Farming	Yes	22.5	30.1	29	39.2	63.9	52.9
Intervention	36	Male	Farming	Yes	21.3	30.1	30.5	38.4	72	45.9
Intervention	53	Male	Farming	Yes	23.6	25.7	27.4	48.7	89.9	61
Intervention	41	Male	Farming	Yes	18.2	34.8	28.6	36.3	66.9	75.7
Intervention	42	Female	Pastoralism	Yes	27.1	28.1	26.1	69.7	48.2	60.8
Intervention	33	Female	Farming	Yes	26.5	28.8	24.8	53	74.6	59.7
Intervention	32	Male	Farming	Yes	16.5	30.7	32.9	64	69.2	46.7
Intervention	33	Male	Farming	Yes	18.7	26.2	33.5	56.8	71.4	63.4
Intervention	43	Male	Farming	Yes	24.2	30.6	32.9	36.2	69.8	38.8
Intervention	33	Female	Farming	Yes	22.4	27.8	33.6	53.8	58.5	67.7
Intervention	42	Female	Farming	Yes	21.3	27.9	30	59.3	71.8	91.4
Intervention	65	Male	Farming	No	23.2	29.2	27.3	48.9	72.3	51
Intervention	49	Male	Other	No	13.5	26.9	26.2	36.9	54.2	65.7
Intervention	34	Female	Pastoralism	Yes	17.5	23.7	21.9	42.8	68	58.6
Intervention	54	Female	Farming	Yes	18.9	30.5	31.3	52.5	65.3	86.1
Intervention	33	Male	Farming	Yes	24.6	20.9	29.6	59	72.2	28.7
Intervention	18	Male	Farming	Yes	12.4	21	30.6	33.8	91.6	66.3
Intervention	25	Male	Pastoralism	Yes	22.2	30	31.6	40.3	64	56
Intervention	18	Female	Other	Yes	19.8	29.1	34.8	58.4	80.3	77
Intervention	34	Female	Farming	Yes	24.1	30.8	27.8	34.3	52.6	45.8
Intervention	38	Female	Other	No	24.8	32.4	31.1	47.1	69.4	64
Intervention	60	Female	Farming	No	28.5	22.1	27.1	47.2	67.2	84.2
Intervention	42	Female	Farming	Yes	16.5	27.4	22.1	58.9	66.6	53.8
Intervention	35	Female	Farming	Yes	17.9	28.1	28.4	52.1	52.2	73.8
Intervention	49	Male	Pastoralism	Yes	21.6	31	35.1	47.1	82.8	61.8
Intervention	18	Male	Farming	No	27.3	30.7	28.3	49.1	72.9	44.6
Intervention	41	Female	Pastoralism	Yes	23.2	28.2	25.5	50.9	65.8	44.8
Intervention	48	Female	Farming	Yes	21.8	30	30.7	50.1	58.8	61.8
Intervention	19	Male	Farming	Yes	26.5	28.7	32.7	60.8	70	71.7
Intervention	53	Male	Farming	Yes	19.7	26.2	31.2	57.4	75.8	81.1
Intervention	42	Male	Farming	No	26.3	30	34.7	49.3	62.8	74.7
Intervention	33	Male	Farming	Yes	28.7	21.4	25.3	61	65.9	61.1
Intervention	46	Male	Pastoralism	Yes	20.8	30.8	34.8	75.7	68.5	55
Intervention	67	Male	Farming	Yes	14.9	35.3	20.7	59.2	54.7	63.2
Intervention	40	Female	Farming	Yes	22	28.4	20.8	44.4	48.4	56.6
Intervention	41	Female	Farming	Yes	28.3	37.8	23.1	31.5	57.3	31.8
Intervention	32	Female	Pastoralism	Yes	23.5	32.2	31.1	41.1	54.7	61.5
Intervention	27	Female	Farming	Yes	15.6	35.5	22.9	48.8	67	63.5
Intervention	49	Male	Other	Yes	26.7	31.3	26.5	75.6	76.6	53.2
Intervention	27	Male	Other	Yes	24.7	32	27.4	43.9	66.3	39.5
Intervention	39	Male	Farming	Yes	25.6	30.4	32.2	67.3	57.5	63.7
Intervention	32	Female	Farming	No	26.2	23.7	34.3	51.8	57.4	64.3
Intervention	44	Male	Farming	Yes	19.1	22.1	32.8	41.9	61.4	53.3
Intervention	42	Female	Farming	Yes	25.8	28.9	23.2	35.5	80.7	85.7
Intervention	51	Male	Farming	Yes	18.7	27.4	29.8	46.1	53.9	62.8
Intervention	32	Female	Farming	No	16.4	27.6	27.6	39.3	65.7	53.3
Intervention	35	Male	Other	Yes	17.9	24.9	28.4	38.6	60.7	76.6
Intervention	25	Female	Farming	Yes	24.3	34.1	28.8	32.4	69	51.8
Intervention	32	Male	Farming	No	19.7	25.8	27.2	41.4	61	74.1
Intervention	43	Male	Farming	Yes	27.6	25.5	26.1	38.5	65.7	71.3
Intervention	48	Female	Farming	Yes	26.1	29.9	27.3	46.4	48.9	50.1
Intervention	26	Female	Pastoralism	Yes	24.2	34	26.3	47.9	51	79.1
Intervention	49	Female	Farming	No	27.2	33.1	33.3	37.5	63	59.9
Intervention	56	Female	Farming	Yes	16.5	27.3	28.8	42.7	61	57.4
Intervention	43	Female	Farming	No	25.4	29	33.2	46.1	64.4	54.8
Intervention	62	Female	Farming	Yes	23.8	36.2	33.6	55.5	65.3	48.7
Intervention	28	Male	Farming	Yes	16.1	34.1	34.8	59.2	72.3	67.6
Intervention	22	Male	Farming	Yes	18.4	33.2	23.9	45.3	58.8	65.9
Intervention	18	Male	Farming	No	20.7	31.3	30.2	47	56.5	51.7
Intervention	57	Female	Farming	Yes	20.6	30.2	24	36.1	82.1	59.6
Intervention	47	Female	Other	No	21.2	37.6	36.6	45.9	75.1	44.1
Intervention	37	Female	Farming	Yes	18.8	34.2	31.5	34.6	69.5	74.5
Intervention	42	Male	Farming	Yes	27.6	30.3	27.2	55	66.1	55.4
Intervention	24	Male	Other	Yes	16.2	32.6	27.8	33.8	83.6	55.1
Intervention	70	Female	Pastoralism	No	16.3	28.8	32.5	51.3	65	68.5
Intervention	40	Male	Farming	No	17.4	23.5	27.6	41	72.5	52.2
Intervention	40	Female	Farming	No	18.7	25.8	23.5	77.1	75.4	74.1
Intervention	47	Male	Other	Yes	18.4	28	30.9	55.7	83	66
Intervention	44	Male	Farming	No	28.5	27.8	34.2	55	81.1	61.1
Intervention	41	Female	Farming	Yes	18.6	27	28.8	46	58	40.8
Intervention	28	Male	Farming	Yes	20.9	27.2	32.2	62.6	64.9	94.7
Intervention	44	Male	Farming	Yes	16.1	34.9	26.7	50.3	62.6	34.1
Intervention	62	Female	Farming	No	19.4	36.9	29.6	40.8	55.9	48.8
Intervention	55	Female	Farming	Yes	23.9	34.9	29.5	57.2	62.7	67.8
Intervention	59	Female	Pastoralism	Yes	24.3	21.4	27.7	48	51.2	59.8
Intervention	32	Female	Farming	Yes	25.5	34	25.2	30.2	67.1	86.1
Intervention	25	Male	Farming	Yes	17.2	32.7	26.1	36.6	36.2	69.8
Intervention	36	Male	Farming	Yes	18.6	29.7	26.3	63.7	72.1	52.1
Intervention	39	Male	Farming	Yes	24.8	27.9	27.2	44.6	53.8	84.1
Intervention	52	Male	Farming	Yes	21.3	28.6	28.5	57.4	53	68.6
Intervention	18	Male	Farming	Yes	21.1	33.7	29.7	32.6	74.4	67.2
Intervention	58	Female	Farming	Yes	23.9	31.3	29.7	60.7	63.6	67.6
Intervention	36	Male	Farming	Yes	25.6	34.6	28.7	25.2	61.4	82.8
Intervention	33	Female	Pastoralism	Yes	18.5	33	29.2	29.2	55.2	66.8
Intervention	25	Male	Farming	Yes	21	35.4	25.6	30.2	57.6	56.6
Intervention	18	Male	Farming	Yes	20.9	32.3	29.9	51.5	78.8	62
Intervention	49	Male	Other	Yes	17.3	25.4	22.7	51.2	68.3	52.3
Intervention	39	Female	Pastoralism	Yes	22.7	23.6	25	37.6	73.3	74.1
Intervention	21	Male	Farming	Yes	19.1	32.3	24.8	26.2	49.4	40.9
Intervention	21	Female	Farming	Yes	21.4	32.1	26.8	62.5	81	78
Intervention	34	Female	Farming	Yes	24.1	27.4	30.3	52.3	60.9	50.7
Intervention	60	Male	Farming	Yes	22.5	30.8	29.8	54	52.7	58.6
Intervention	35	Male	Farming	Yes	17.7	28	30.2	51	60.9	52.9
Intervention	19	Female	Farming	Yes	22.3	27.9	32.4	30.7	74.5	51.7
Intervention	35	Male	Other	Yes	22	24.2	29.8	44.3	74	67.8
Intervention	35	Male	Farming	Yes	19	30	25	40.9	54.2	71.7
Intervention	18	Female	Farming	Yes	17.8	27.8	29.2	36.7	65	69.2
Intervention	37	Female	Farming	Yes	22	31.3	25.3	36.3	60.4	39.7
Intervention	35	Male	Farming	Yes	15.5	23	27.7	48.7	57.6	70.7
Intervention	47	Male	Farming	Yes	16.9	32.1	30.7	55.7	91.7	51.9
Intervention	62	Male	Farming	Yes	16	27.8	28.4	46.5	61.5	78.6
Intervention	53	Male	Farming	Yes	16.3	25.6	31.7	55.3	80.7	79.2
Intervention	35	Male	Farming	No	19.4	28.1	29.1	62.2	66.3	53.8
Intervention	24	Male	Farming	Yes	25.9	23.6	22.9	54.9	63.2	34.9
Intervention	71	Male	Farming	Yes	24	28.7	27.5	59.3	81.4	61.6
Intervention	39	Female	Farming	Yes	26.1	30.3	31.7	35.1	83.3	59.7
Intervention	38	Female	Farming	No	18.8	30.1	31	41.6	63.1	70.1
Intervention	38	Female	Other	Yes	13	31.6	24.7	29.7	79.7	66.7
Intervention	41	Female	Pastoralism	Yes	18.9	27.6	27.2	43.8	64	70.8
Intervention	36	Male	Other	Yes	26.1	32.8	29.9	20.4	66.2	58.6
Intervention	31	Male	Other	Yes	19.7	30.8	27	56.1	69.5	79.1
Intervention	31	Female	Farming	Yes	21.3	33	27.7	56.8	75.6	69.8
Intervention	38	Male	Farming	Yes	20.5	36.3	30.1	34.7	84.6	52.5
Intervention	31	Male	Farming	Yes	24.3	23.8	36.6	50.1	56.7	73.5
Intervention	29	Male	Farming	Yes	24.9	28.3	30.4	58.3	67.9	70.5
Intervention	39	Male	Farming	Yes	14.9	26.8	31.9	52.1	49.4	50.9
Intervention	35	Male	Farming	Yes	11.2	38.1	25.5	32.7	61.4	48.3
Intervention	58	Male	Farming	Yes	24.2	32.1	24	46.9	68.1	57.4
Intervention	18	Male	Farming	Yes	20.5	30.9	25.5	58	61	63.6
Intervention	52	Female	Farming	No	24.2	34.5	28.4	31.2	75.7	49.5
Intervention	54	Male	Other	Yes	20.2	29.8	30	38.1	75.5	68.8
Intervention	18	Female	Farming	Yes	23.6	31.6	31.1	52.3	83.4	75.8
Intervention	34	Female	Other	Yes	20.8	28	32.8	53.7	55.3	48.2
Intervention	33	Female	Farming	Yes	18.4	24.5	34.3	48.2	77.8	55.3
Intervention	20	Male	Farming	Yes	19.7	33.3	20.6	48.8	46	73.6
Intervention	28	Female	Farming	No	20.7	26.1	25.1	41	62.4	70.9
Intervention	24	Male	Farming	Yes	24	32.7	35.9	44.1	58.5	70.5
Intervention	61	Male	Other	Yes	20.7	34	30.5	23.5	73	62
Intervention	50	Female	Farming	Yes	16.9	21	28.7	46.8	44.8	67.2
Intervention	55	Male	Farming	Yes	28.4	33.9	20	60.7	70.3	77.7
Intervention	47	Male	Farming	Yes	22.7	30.8	23.8	58.7	45.9	77.5
Intervention	24	Male	Pastoralism	Yes	27.1	26	32.7	56.6	67.8	58.2
Intervention	31	Male	Other	Yes	16.8	23	27.2	37.5	68.3	64.3
Intervention	44	Male	Farming	Yes	20.3	29.5	31.3	53.3	62.6	72.4
Intervention	22	Female	Farming	Yes	22.2	29.1	27.5	36	78.1	68.5
Intervention	47	Male	Farming	Yes	24.2	34.1	38	51.8	56.7	62.9
Intervention	35	Male	Farming	Yes	13.5	30.1	28.9	34.3	69.9	72
Intervention	33	Female	Farming	Yes	13.6	25.6	23	24	66.8	59.9
Intervention	47	Female	Farming	Yes	18.6	23.7	31.5	26.2	82.5	68.8
Intervention	44	Female	Farming	Yes	23.7	30.4	29.4	59.6	48.3	64.4
Intervention	33	Female	Farming	Yes	18.6	29.8	26.5	58.8	82.8	54.5
Intervention	53	Female	Farming	Yes	20.9	34.9	29.9	46	78.9	48.6
Intervention	24	Female	Farming	Yes	21.6	27.9	33.4	32.5	69.9	87.5
Intervention	46	Male	Farming	Yes	17.9	31.4	28.1	35	66.3	49.1
Intervention	46	Female	Farming	Yes	27.5	29.3	25.2	40	60	64.1
Intervention	34	Female	Farming	No	18.1	19.3	29.9	65	62.4	65
Intervention	42	Female	Farming	Yes	12.7	32.6	26.5	42.5	59	64.5
Intervention	22	Female	Farming	Yes	17.3	28.1	30.4	48.4	52.6	73.3
Intervention	50	Male	Farming	Yes	17.9	32.4	34.3	58.6	73.2	58.9
Intervention	36	Male	Farming	Yes	22.1	30.5	24.4	42.2	76.1	59.8
Intervention	31	Female	Pastoralism	Yes	22.3	25.9	21.5	49.1	82	64.3
Intervention	52	Male	Farming	Yes	23.9	29.1	38.5	55.6	64.5	44
Intervention	29	Female	Farming	Yes	29.3	29.7	29.6	52.8	74.9	51.8
Intervention	20	Male	Farming	Yes	21.5	30.5	24	54.9	46.5	77.5
Intervention	18	Female	Farming	Yes	24.9	31.8	25	52.5	64.5	57.1
Intervention	46	Female	Farming	Yes	19.5	29.9	27.2	40.1	63.2	40.8
Intervention	22	Male	Pastoralism	Yes	22.6	36.6	30.3	53.9	69	45.2
Intervention	61	Male	Other	Yes	19.9	33.1	19.2	50.2	55.8	53.4
Intervention	18	Male	Farming	Yes	20.8	33.7	32	39.7	60.8	56.9
Intervention	60	Female	Farming	No	22.1	33	26.3	34.7	57.3	57.6
Intervention	41	Female	Farming	Yes	25.5	30.1	35.2	43.1	75.5	79.1
Intervention	37	Male	Farming	Yes	21.2	32.7	30.7	56.7	64.6	66.4
Intervention	31	Male	Farming	Yes	21.2	34.7	32.8	47.7	66.1	76.7
Intervention	43	Female	Pastoralism	Yes	22.7	30.3	28.1	63.5	57.1	66.8
Intervention	38	Female	Farming	Yes	25.1	33.9	30.1	47.6	75.2	68.1
Intervention	52	Male	Farming	Yes	15.5	24.7	34.8	37.1	70.8	59.6
Intervention	40	Male	Farming	Yes	22.4	34.1	25.6	46.8	66.1	76.4
Intervention	40	Female	Farming	Yes	15.8	26.8	30.9	59.4	56.4	51
Intervention	33	Female	Farming	Yes	26.9	24.7	31.3	62.7	67.2	61.2
Intervention	37	Female	Pastoralism	Yes	22.8	28.7	34.7	31	72.2	47.9
Intervention	42	Male	Farming	No	26.6	30.6	26.5	49.1	80.2	69.6
Intervention	18	Female	Farming	Yes	14.4	31.1	25.6	53.9	74.4	80.9
Intervention	21	Male	Farming	Yes	20.7	34.8	34	22.6	60.7	68.5
Intervention	48	Female	Other	Yes	25.1	27.6	28.2	75.7	44.7	34.2
Intervention	40	Male	Farming	Yes	27.3	36.2	25.4	28.3	72.1	89.2
Intervention	36	Male	Farming	Yes	22.9	36.2	27.1	27.2	52.3	60.2
Intervention	38	Male	Farming	Yes	19.6	30.7	23.4	35.7	64.4	70.9
Intervention	43	Female	Farming	Yes	20.3	26.6	29	47.6	68.3	63.9
Intervention	31	Male	Other	Yes	17	39.5	17.3	23.3	62.9	56.3
Intervention	28	Male	Farming	Yes	27.5	36.5	30.2	44	69	49.3
Intervention	41	Female	Farming	Yes	24.1	30.5	22.8	15.1	46.8	69.5
Intervention	25	Male	Farming	Yes	20.6	24.5	34.3	40.6	65.6	74.2
Intervention	43	Male	Farming	Yes	23.7	32.2	26.2	51.3	82.1	55.5
Intervention	18	Male	Farming	Yes	20.9	27.5	25.7	59	61.8	47.1
Intervention	51	Female	Farming	Yes	20.1	33.2	29.3	27.6	74.7	59.7
Intervention	44	Female	Farming	Yes	18.2	30.7	30.7	30.6	61.3	83.5
Intervention	41	Female	Farming	Yes	18.3	23.6	29.2	44.9	60.1	72.6
Intervention	51	Female	Farming	Yes	23	25.2	22.5	58.6	58.7	61.7
Intervention	60	Male	Farming	Yes	25.8	26.8	29.6	62.6	49.9	50
Intervention	51	Female	Pastoralism	Yes	20	36.2	28.8	49	69.3	66.7
Intervention	18	Male	Farming	Yes	18.1	27.3	28.6	35.5	63.7	78.3
Intervention	22	Male	Farming	Yes	25.4	20.9	31.5	38.9	54.1	65.2
Intervention	30	Male	Pastoralism	Yes	21.7	29	25.9	30.7	58.3	66
Intervention	38	Male	Pastoralism	Yes	12	28.8	24.5	60.7	46.7	72.1
Intervention	45	Male	Farming	Yes	18.4	36	31.6	49.6	69.3	63.3
Intervention	29	Male	Farming	Yes	23.4	35.7	21.1	64.3	60.8	57.5
Intervention	41	Female	Pastoralism	Yes	18.1	24.7	30.3	38.2	62.4	67.8
Intervention	28	Male	Farming	Yes	21.6	31.3	24.1	34.1	71.7	70.5
Intervention	30	Female	Other	Yes	16.2	32.9	34.8	60.4	76.4	69.2
Intervention	20	Male	Pastoralism	Yes	19.7	29.3	23.1	42.2	78.7	50.8
Intervention	26	Male	Farming	No	16.8	30.5	23.2	42.9	71.2	65
Intervention	21	Male	Farming	Yes	16.2	34.1	38.7	65.2	61.1	42
Intervention	26	Male	Farming	Yes	18.2	30.9	34.3	50.5	52.2	64.9
Intervention	52	Male	Other	Yes	25.1	32.4	25.8	61.4	81.3	63
Intervention	26	Female	Pastoralism	Yes	23.2	35.3	24	53.3	75.4	67.8
Intervention	72	Female	Farming	Yes	30	28.1	25.3	57.1	56.1	57.2
Intervention	44	Male	Farming	Yes	18.9	32.9	30.6	63.7	78	69.4
Intervention	40	Male	Farming	Yes	25.7	28.1	30.3	35.8	72.7	74.1
Intervention	27	Female	Other	No	29.2	34	27.5	58.1	57.3	60.9
Intervention	47	Male	Farming	Yes	26.1	27.4	36.1	67.5	54.6	46
Intervention	31	Male	Farming	Yes	26.2	31.5	25.9	39.4	82.1	68.4
Intervention	40	Male	Farming	Yes	21.9	28.9	21.3	39.1	58.9	57.8
Intervention	71	Female	Farming	Yes	22.4	32.1	40	72	74.8	66.8
Intervention	37	Female	Other	No	17.5	26.5	32.9	42.9	69.6	63.5
Intervention	53	Female	Farming	Yes	10.2	28.7	28.3	51.5	43.7	44
Intervention	29	Male	Pastoralism	Yes	22.3	29.6	30	27.9	68.1	66
Intervention	38	Male	Farming	Yes	17.4	25.6	29.6	53.8	65.7	73.4
Intervention	61	Male	Farming	No	19.6	27.4	22.4	43.8	79.3	57
Intervention	30	Female	Farming	Yes	17.9	23.4	29	53.7	74.7	39.2
Intervention	61	Female	Pastoralism	Yes	22.8	31.3	30.9	46.8	66.1	67.9
Intervention	47	Male	Farming	Yes	20.6	32.9	30.7	59.9	79.6	60.3
Intervention	31	Male	Farming	No	26.7	24.4	19.3	58.8	60	84.1
Intervention	46	Male	Farming	Yes	18.4	25.2	29.9	49.9	65.8	49.4
Intervention	51	Male	Pastoralism	No	22.2	26.1	31	40	68.6	86.7
Intervention	46	Male	Farming	Yes	20.6	24.8	28.9	24.7	50	73.5
Intervention	18	Female	Farming	Yes	20.2	31.4	24.1	43.6	63.8	63.2
Intervention	29	Female	Farming	Yes	21.1	27.1	34.5	56.9	52	54.7
Intervention	35	Male	Pastoralism	No	27.8	30.8	29	46.3	60.5	54.4
Intervention	37	Male	Pastoralism	Yes	24.9	26.9	28.2	50.4	43.7	62.2
Intervention	46	Male	Farming	Yes	19.5	28.5	28.5	47.1	48.6	76.9
Intervention	40	Male	Other	Yes	18.8	33.9	23.1	22.9	80.6	49.3
Intervention	21	Male	Farming	Yes	18.1	25.3	37.1	47.4	78.9	61.5
Intervention	43	Female	Farming	Yes	21.9	27.6	33.7	48.7	64.8	54
Intervention	46	Male	Pastoralism	Yes	15	31.4	26.3	43.6	68	58.8
Intervention	45	Female	Farming	Yes	20.5	28.6	21.2	51.4	54.2	71.9
Intervention	52	Female	Other	Yes	23	30.5	31.3	27.1	45.9	62.4
Intervention	49	Female	Farming	Yes	18.4	29.8	32.2	32.2	76.3	68.6
Intervention	44	Male	Farming	No	21.6	23.9	29.4	53.2	71.3	62.7
Intervention	37	Female	Farming	Yes	22.5	35.3	27.7	47.7	57.8	45
Intervention	18	Male	Farming	No	14	29.4	22.3	64.5	55.3	34.8
Intervention	44	Male	Farming	Yes	22.3	36	31.6	56.1	67.6	55
Intervention	41	Male	Farming	Yes	19.5	31.1	22.2	67	66.5	78.6
Intervention	42	Female	Farming	Yes	29.2	34.9	30.2	64.7	73.1	77.4
Intervention	22	Male	Pastoralism	Yes	22.2	33.8	32.1	51.4	59	57.4
Intervention	24	Male	Farming	Yes	17.5	34.6	27.8	62.9	57.5	71
Intervention	52	Male	Pastoralism	Yes	13.8	28.9	28.1	35.4	57.2	72.5
Intervention	38	Male	Farming	Yes	21.2	36.8	18.8	55.8	89.6	75.9
Intervention	47	Male	Farming	No	26.9	28	25.3	35.6	61.7	65.7
Intervention	38	Male	Farming	Yes	18.9	31.2	27.1	68.7	67.8	53.7
Intervention	38	Female	Farming	Yes	22.7	33.2	22.5	48.1	47.2	88.5
Intervention	50	Male	Pastoralism	Yes	24.5	40	34.4	47.4	59.7	69.7
Intervention	31	Female	Other	No	24.3	34.1	25.9	37.4	61.4	63.5
Intervention	39	Female	Farming	Yes	21.4	27.7	27.2	9.3	85.5	63.7
Intervention	32	Male	Farming	Yes	18.6	30.9	36.4	47.7	79.2	63.8
Intervention	32	Female	Farming	Yes	20.3	24.5	33.3	33.7	50.1	74
Intervention	34	Female	Other	Yes	16.9	35.5	36.3	74.3	73.2	55
Intervention	41	Female	Pastoralism	Yes	17.4	17.6	34.3	48	60.5	74.7
Intervention	32	Female	Farming	Yes	25.6	29.1	31.9	61	62.6	59.6
Intervention	54	Female	Farming	No	22.8	38.4	25.8	63.4	51.3	56.4
Intervention	27	Male	Farming	Yes	22.6	32.8	23.1	67.1	64.3	69.1
Intervention	36	Female	Pastoralism	Yes	18.4	31.7	32.4	65.9	62.8	84.8
Intervention	32	Male	Pastoralism	Yes	26.4	25.2	26.9	60.3	44.7	75.7
Intervention	57	Female	Other	Yes	20.4	35	19.5	49.2	72.6	59.5
Intervention	41	Male	Farming	Yes	22	26.2	30.9	30.7	74.2	92.3
Intervention	51	Female	Farming	Yes	26.3	26.3	30.1	44	60.9	71.7
Intervention	19	Male	Farming	Yes	18.4	35	23.8	45.4	71.7	73.5
Intervention	42	Female	Farming	Yes	18.7	26.1	34.8	51.8	76.2	61.5
Intervention	50	Female	Farming	No	25.7	24.1	25.5	70.6	55.6	55.2
Intervention	39	Female	Pastoralism	Yes	24.8	26	38.2	49.8	48.6	58
Intervention	52	Female	Farming	Yes	22.8	30.5	34.5	45.3	69.9	69.8
Intervention	31	Male	Farming	Yes	12.3	27.8	33.2	50.2	70.3	78.6
Intervention	56	Female	Farming	Yes	26.8	36.9	26.6	30.5	83	65.2
Intervention	68	Female	Other	No	18.8	29.9	29.8	55.1	64.1	66.7
Intervention	33	Female	Farming	Yes	19	25	30.2	36.3	70.5	75
Intervention	32	Female	Farming	Yes	20.6	22.5	27.9	50.2	60.5	36.6
Intervention	57	Male	Pastoralism	Yes	16.4	33.3	29.2	37.6	56.4	35.3
Intervention	58	Male	Farming	Yes	26.5	31	36.2	49.9	75.5	60.5
Intervention	31	Male	Farming	Yes	22.1	32.2	26.2	51.3	73.8	41.6
Intervention	33	Female	Other	Yes	24.3	28.1	31	57.4	50.5	50.2
Intervention	34	Male	Other	Yes	18.1	30.4	26.8	55.9	66.8	63.8
Intervention	21	Female	Farming	No	25.5	34.4	22.6	59.4	59.5	52.6
Intervention	26	Male	Farming	Yes	27.4	29.8	33.5	49.6	73.3	51.9
Intervention	25	Female	Other	Yes	16	25.3	30.8	38.1	63.4	77
Intervention	28	Female	Farming	Yes	16.7	32.6	33.1	42.5	65.3	66.8
Intervention	38	Male	Farming	Yes	18	28.4	25.2	51.4	74.6	39.6
Intervention	41	Female	Farming	Yes	25.3	33.6	26.6	61	71.4	75.5
Intervention	58	Female	Other	Yes	22.2	29.9	30.7	54.7	52.9	63.8
Intervention	25	Male	Farming	Yes	21.1	33.2	32.3	60.5	66.2	74
Intervention	51	Male	Farming	Yes	22.9	31.8	34	54.6	66.9	47.7
Intervention	35	Male	Farming	Yes	29.5	34.9	28.7	47.9	55.9	65.6
Intervention	37	Female	Farming	Yes	14.1	33.6	31.2	51.7	69.8	62
Intervention	47	Male	Farming	No	20.1	24.7	36.4	51.6	71.5	69.4
Intervention	24	Male	Farming	Yes	8.5	22.5	27.5	53.2	49.9	62.1
Intervention	43	Male	Farming	Yes	23.5	29.5	30.3	55.8	58.9	48.6
Intervention	40	Male	Pastoralism	No	26	32.1	28.5	46.5	68.4	59.8
Intervention	44	Female	Farming	Yes	20.1	27	30	52.5	69.5	65.8
Intervention	42	Female	Farming	No	24.1	31.5	34.8	49	63.7	39.5
Intervention	70	Male	Farming	Yes	14.9	31.4	26.7	66	75.6	44.5
Intervention	30	Female	Farming	Yes	23.4	29.5	25.6	39	66.5	59.5
Intervention	31	Female	Farming	Yes	31.7	27.3	32.7	37.1	64.5	72.5
Intervention	30	Male	Farming	Yes	19.8	25.8	35.3	40.8	72.8	58.5
Intervention	31	Male	Farming	Yes	23.2	39.5	23.1	38	86.8	40.5
Intervention	30	Female	Farming	Yes	18.9	21.5	27.7	43.7	67.9	60
Intervention	53	Female	Pastoralism	No	22.1	25	30.4	35	66.3	61.4
Intervention	56	Female	Farming	No	26.1	39.9	29.3	61.6	58.6	54.7
Intervention	31	Male	Farming	Yes	23.9	25.8	29.7	51	63	61.2
Intervention	27	Female	Pastoralism	Yes	21	27.6	29.4	52.5	49.3	60.3
Intervention	44	Female	Pastoralism	No	20.9	32.5	26.1	37.6	65.4	60.1
Intervention	31	Female	Pastoralism	Yes	16.4	31.7	18.6	50.6	59.9	65.6
Intervention	46	Female	Farming	Yes	25.7	31.5	29	50.3	62.3	53.8
Intervention	41	Female	Other	Yes	24.5	35.6	28.2	18.7	72.7	43.1
Intervention	19	Female	Pastoralism	Yes	16.1	26.1	23	32.3	68.2	35.5
Intervention	58	Male	Farming	Yes	22.1	30.5	26.3	39.3	78.6	71.7
Intervention	61	Female	Farming	Yes	17.5	29.6	32.8	56.7	79.6	50.3
Intervention	30	Male	Farming	Yes	19.5	26.4	28.3	43.2	63.5	67
Intervention	33	Female	Farming	Yes	24.8	30.2	29.9	58.3	73.5	73.3
Intervention	42	Male	Farming	Yes	25.6	32	24.7	55.3	69.1	57.8
Intervention	42	Female	Farming	Yes	24.4	32.1	31.5	26.1	72.4	78.6
Intervention	47	Male	Farming	Yes	20.3	34	38.2	56.8	68.2	77.6
Intervention	64	Female	Farming	Yes	23.3	29.6	31.2	38.8	60.7	78
Intervention	36	Male	Farming	Yes	18.2	25.9	30.9	54.6	68.7	82.9
Intervention	28	Male	Farming	Yes	24.6	24.4	30.1	29.3	60	80.2
Intervention	20	Female	Farming	Yes	21.3	28	26.4	39.3	83.5	75.2
Intervention	29	Female	Pastoralism	Yes	19.4	24.5	33	33.5	74.5	39.2
Intervention	38	Male	Farming	Yes	18.3	27	28.6	47.6	97.7	61.2
Intervention	61	Male	Farming	Yes	24.2	25.2	36.2	57.3	64	71.2
Intervention	31	Male	Farming	No	20.8	27.2	36.4	35.3	76	62
Intervention	41	Female	Pastoralism	Yes	19.3	36.8	26.9	56.6	86.3	51.9
Intervention	38	Female	Farming	Yes	19.3	29.3	32.2	47.1	68.6	71.1
Intervention	53	Female	Pastoralism	Yes	16.2	35.9	26.7	71	66.4	87.7
Intervention	71	Male	Farming	No	22.1	31.4	33.9	49.5	62.2	65
Intervention	31	Male	Farming	Yes	22.6	27.4	25.5	35.9	56.7	57.4
Intervention	32	Female	Farming	Yes	15.2	29.3	30.1	58	75.6	76.7
Intervention	52	Male	Farming	Yes	16.9	23.4	31.2	38	71.4	63.6
Intervention	47	Female	Farming	Yes	14.5	28.5	32.3	37.3	77.4	73.4
Intervention	62	Male	Other	No	26.5	24.7	24.9	42.8	78	41.5
Intervention	46	Female	Farming	Yes	24	32.1	31	45.2	50.1	57.1
Intervention	33	Female	Farming	Yes	26	28.1	30	49.6	67.7	60.4
Intervention	46	Male	Pastoralism	Yes	28.2	28.6	24.4	36.5	68	45.8
Intervention	52	Female	Farming	Yes	23.2	28.2	33.8	42.2	71.4	51.9
Intervention	49	Female	Farming	Yes	21.1	33.3	35.7	41	55.4	61.5
Intervention	45	Male	Farming	Yes	22.2	26.3	29.3	52.4	70.7	65
Intervention	52	Male	Farming	Yes	18.7	26.1	28.6	36.4	62.5	66.2
Intervention	53	Female	Farming	Yes	18	31.1	27.6	29	59.4	71.9
Intervention	56	Male	Farming	Yes	19.6	34	39.5	35.1	59.2	79.5
Intervention	46	Female	Farming	Yes	20.4	31.1	32.9	42.8	54.3	70.9
Intervention	36	Male	Other	No	14.4	38.3	26.2	52.3	72.5	44.2
Intervention	40	Male	Other	Yes	16.2	26.2	22.6	59.4	38.6	61.7
Intervention	54	Male	Farming	Yes	16.1	21.4	27.4	33.4	72.2	51.9
Intervention	28	Male	Farming	Yes	15.9	31.7	27.4	30.3	65.8	53.6
Intervention	43	Male	Farming	Yes	24.1	29.2	30.1	46.1	62.3	66
Intervention	33	Male	Farming	Yes	20	31.6	29.3	39.9	75	63.3
Intervention	38	Female	Pastoralism	Yes	20.6	33.1	33.8	42.3	58.2	73.7
Intervention	55	Female	Farming	Yes	23	23.9	18	65.6	58.7	55.9
Intervention	41	Female	Pastoralism	Yes	24.9	28.7	31.3	32.2	54.2	72.4
Intervention	39	Male	Farming	Yes	23.3	32.1	32.8	45.8	51.5	57.9
Intervention	21	Female	Farming	Yes	28.3	30.8	21.7	54	65.3	53.4
Intervention	48	Male	Farming	Yes	21.6	29.1	25.5	38.6	87.4	72.7
Intervention	46	Male	Pastoralism	Yes	22.2	32.7	27.1	60.7	60.3	86.2
Intervention	66	Male	Other	Yes	18.9	33.7	31.2	66.5	69.2	64
Intervention	34	Male	Farming	Yes	13.4	21.8	27.4	46.1	50.4	52.5
Intervention	41	Female	Farming	Yes	21.7	35.9	29	66.9	66.1	70
Intervention	41	Male	Other	No	25	25	25.9	49.9	68	60.4
Intervention	58	Female	Farming	No	18.3	32.1	29.4	35.6	73.6	68.7
Intervention	37	Male	Farming	Yes	19.3	28.5	26.5	58.6	52.5	65.1
Intervention	42	Female	Farming	Yes	25.4	34.7	25.5	35.7	76.3	80.4
Intervention	46	Female	Farming	Yes	21.2	32.6	29.7	33.3	52.2	75
Intervention	41	Male	Farming	Yes	17.5	32.1	32.6	57.7	91.5	73.2
Intervention	32	Female	Farming	Yes	17.4	30.7	30.2	39.2	64.7	84
Intervention	41	Female	Farming	No	24.2	27.7	28.2	69.4	88	71.8
Intervention	52	Female	Farming	Yes	20.8	25.9	33.2	28	82.5	68.7
Intervention	25	Female	Farming	Yes	20.8	24.4	27.2	60.3	58.1	52.7
Intervention	40	Female	Farming	No	15.6	27.4	28.8	46.6	51.9	46.2
Intervention	29	Male	Pastoralism	No	23.4	33.4	33.9	22.3	67.1	70.9
Intervention	54	Female	Other	Yes	25.7	25.9	27.3	61.9	56.4	81.7
Intervention	18	Male	Farming	Yes	19.9	34.5	26.9	36.7	81.7	82
Intervention	31	Male	Farming	Yes	23.1	25.8	32.1	18.9	84.1	56.5
Intervention	43	Female	Farming	No	19.7	29.2	25	70.1	66.1	49.4
Intervention	58	Male	Farming	No	23.9	31.6	34	58.1	70.8	60.7
Intervention	37	Male	Pastoralism	Yes	23.5	33.8	21.2	44.6	66.1	42.8
Intervention	31	Male	Farming	Yes	19.8	28.4	29.4	63.6	45.4	48.9
Intervention	62	Male	Farming	Yes	12.5	31.7	26.4	49.3	84.7	63.3
Intervention	19	Male	Farming	Yes	18	30.6	30.5	50.3	53.2	67.9
Intervention	18	Female	Farming	Yes	22.8	28.8	35.1	67.6	59.4	60.8
Intervention	44	Male	Farming	No	25.1	25.7	24.4	52.3	79.2	47.7
Intervention	32	Female	Pastoralism	Yes	18.9	31.5	23.3	61.7	47.9	79.2
Intervention	25	Male	Other	Yes	27	29.9	33.8	42.1	65.1	61.9
Intervention	47	Female	Farming	Yes	27.7	28.6	28.2	32.5	58.5	65.1
Intervention	41	Female	Farming	Yes	24.3	30.2	28.8	44.5	70	53.7
Intervention	31	Male	Farming	Yes	16.6	32	28	56.7	63.8	64.9
Intervention	22	Female	Farming	Yes	24.4	23.2	27.6	67	78.7	80.9
Intervention	49	Female	Farming	Yes	19.1	27.7	25.4	49.7	77.4	57.3
Intervention	46	Female	Pastoralism	Yes	18.9	26	28.1	74.5	79.7	71.9
Intervention	37	Male	Farming	Yes	23.3	26.3	25.6	40.1	76.6	69.5
Intervention	62	Female	Farming	Yes	23.2	26.7	33.2	37.9	75.7	52.8
Intervention	24	Female	Farming	Yes	23.3	34.1	26.8	50.5	51.5	59.8
Intervention	18	Male	Farming	Yes	24.2	31.1	34.5	51.6	90.1	76
Intervention	29	Male	Farming	Yes	21.2	25.5	31.8	44.9	57.9	81.6
Intervention	38	Male	Farming	Yes	15.3	30.5	25	43.7	81.3	79.1
Intervention	41	Male	Pastoralism	Yes	30.1	31.5	24.7	39.8	63.3	70.2
Intervention	35	Female	Farming	Yes	19.8	28.4	28.2	57.5	76.6	58.5
Intervention	43	Male	Farming	Yes	18.4	24.8	26.1	50.6	61.7	56.2
Intervention	22	Male	Farming	Yes	16.3	25.6	26.1	53.5	70.8	65.6
Intervention	57	Female	Farming	Yes	22	23.6	32.5	19.2	61.9	56.5
Intervention	37	Male	Farming	Yes	21.5	38.1	30.2	62.4	39.8	46.5
Intervention	53	Male	Farming	Yes	20.9	23.1	34.1	38.3	63.8	70.1
Intervention	43	Female	Farming	Yes	27.7	24.9	24.7	63.9	84.7	65.5
Intervention	44	Male	Farming	No	24.2	29.7	21.6	33.8	59.3	61.4
Intervention	45	Male	Farming	Yes	17.1	22.7	26.1	33.1	74	61.6
Intervention	44	Male	Pastoralism	Yes	30.1	25.3	33.5	42.9	52.4	75
Intervention	46	Female	Other	Yes	15	30.2	26.5	53.1	63.7	79
Intervention	55	Female	Farming	Yes	20.9	30.6	35.8	62.3	66	72.9
Intervention	41	Female	Other	Yes	18.3	31.4	26.9	46.2	62.3	74.3
Intervention	47	Male	Pastoralism	Yes	23	32.6	31.5	40.5	59.6	52.5
Intervention	37	Female	Farming	Yes	24.1	29.6	29	63.3	53.7	79.4
Intervention	57	Female	Farming	Yes	19.7	27.1	21.1	45.1	75.2	61.5
Intervention	29	Male	Farming	No	25.8	31.6	26.4	45.7	65.6	75.3
Intervention	61	Female	Farming	Yes	22.2	35.2	31.1	59.5	45.2	42.2
Intervention	38	Female	Farming	No	27.5	32.2	28.9	55.7	43.1	78.5
Intervention	20	Male	Farming	Yes	25.3	26.4	27.3	56.8	76.1	45.2
Intervention	40	Male	Farming	Yes	19.4	32.2	28.4	60.1	66.6	84.7
Intervention	29	Male	Farming	Yes	25.8	32	29.7	35.2	58.6	53.9
Intervention	49	Male	Farming	No	18.7	25	17.9	51.4	80.7	60.3
Intervention	30	Female	Farming	Yes	24	28.9	26.8	38.7	61.5	48.6
Intervention	32	Female	Other	No	23.6	32	25.8	39.3	67.2	51
Intervention	18	Male	Pastoralism	Yes	19.2	34.3	31.9	59.7	77.3	74.4
Intervention	32	Female	Farming	Yes	13	27.3	32.2	61.7	76.2	62.3
Intervention	18	Female	Farming	Yes	27.6	24.1	29.8	77.9	73.8	50.2
Intervention	18	Male	Farming	No	23.2	31.8	29.6	49.4	62.6	64.1
Intervention	48	Female	Other	Yes	21.5	28.8	20.8	32.2	48.1	68.2
Intervention	48	Female	Pastoralism	No	21.5	30.7	25.4	58.4	68.7	64
Intervention	44	Male	Farming	Yes	25.5	30.5	27.7	39	71.6	64.2
Intervention	26	Male	Farming	Yes	30.6	30.4	28.7	42.4	48.2	56.8
Intervention	37	Male	Farming	Yes	25.2	28.2	29.1	59.5	61.5	54.6
Intervention	38	Male	Pastoralism	Yes	22.9	33.3	21.1	46.8	65.8	25.3
Intervention	23	Male	Other	Yes	22.6	26.5	33.1	54.5	67.5	87.5
Intervention	57	Male	Farming	Yes	22.9	30.8	24.9	49.8	62.3	79.5
Intervention	49	Male	Farming	Yes	17.2	31.3	19.8	57.2	46.9	58.1
Intervention	35	Female	Farming	Yes	23.9	29	32.3	45.3	55.3	44.6
Intervention	38	Male	Other	Yes	15.9	32.9	25.4	34	77.2	59.2
Intervention	41	Male	Farming	Yes	23.3	28	31.9	61.7	55	53.2
Intervention	18	Female	Farming	Yes	19.4	38.8	22	41	59.8	60.3
Intervention	35	Female	Farming	Yes	25	30.7	27.4	54.2	43.9	64.5
Intervention	29	Male	Pastoralism	No	23	34.6	25.1	53.5	74.1	53.6
Intervention	25	Male	Farming	Yes	19.9	33.3	30.7	47.3	64.7	56.8
Intervention	34	Female	Farming	Yes	17.2	35.4	25.4	49.8	54.6	73.9
Intervention	61	Male	Pastoralism	No	27.6	30.1	30.7	49.1	62.6	86.3
Intervention	46	Male	Farming	Yes	21	34.2	27.4	19.8	88.2	68.1
Intervention	31	Male	Farming	No	28.7	35.5	26.4	50	68.8	56.3
Intervention	45	Male	Farming	No	16.2	30.9	32.8	52.7	84.6	73.7
Intervention	56	Male	Farming	No	20.3	27.1	37.1	61.5	51.7	58.7
Intervention	50	Male	Other	Yes	11.9	36.9	27.6	31.6	64.2	69.9
Intervention	39	Female	Other	Yes	24.6	29.9	25.9	54.4	53.9	57.9
Intervention	30	Female	Farming	Yes	24.9	30.1	28.5	33.4	62.3	66
Intervention	47	Female	Other	Yes	18.9	30.9	29.5	64.6	63.2	65.4
Intervention	43	Male	Farming	Yes	18.7	26.7	21.7	42.7	78.6	60
Intervention	50	Male	Farming	Yes	19.8	31.1	24.9	57.1	75	48
Intervention	46	Female	Farming	Yes	20.4	31.2	22.9	65.7	71	61.7
Intervention	52	Female	Farming	Yes	19.1	29.8	24.4	46.8	48.6	62.3
Intervention	31	Male	Pastoralism	Yes	25.9	29.5	35.1	40.5	69.6	68.1
Intervention	55	Male	Other	Yes	19.4	28.9	19.7	45.3	47.3	67.9
Intervention	41	Male	Farming	Yes	13.4	28.3	30.6	63.3	71.4	77.2
Intervention	65	Male	Farming	Yes	20.3	32.6	27.6	58.5	70.1	55.6
Intervention	29	Male	Farming	Yes	19.2	30.9	30.1	57.8	70.6	70.3
Intervention	60	Female	Pastoralism	Yes	15.9	33.4	24.3	68.6	71.2	63.9
Intervention	41	Male	Farming	No	22.2	27.8	27.2	47.4	84.1	57.1
Intervention	30	Female	Farming	Yes	13.3	34.2	34.1	49.6	69.4	70.9
Intervention	32	Female	Pastoralism	Yes	23	33.3	27.2	55.2	68	58
Intervention	34	Male	Other	Yes	21.3	28.9	34.9	31.6	68.2	57
Intervention	44	Female	Farming	Yes	19	27.2	17.9	61.9	54.8	23.7
Intervention	45	Female	Pastoralism	Yes	16.6	32.1	31.3	39.8	72.3	85.6
Intervention	31	Male	Farming	Yes	15.3	23.6	29.3	51.7	59.9	55.2
Intervention	38	Male	Farming	Yes	25.1	28.2	23.2	57.1	84.6	74.2
Intervention	66	Male	Pastoralism	Yes	20.1	30.9	32.9	41.6	59.5	53.4
Intervention	60	Female	Farming	Yes	14.3	29.2	26	37.5	58.9	54.4
Intervention	44	Female	Farming	Yes	21.4	25.6	30	47.9	69.5	60.5
Intervention	39	Male	Farming	Yes	20.3	30.2	25.1	55.9	56	71.8
Intervention	40	Male	Pastoralism	Yes	27.3	25.9	27	56.6	60.8	74.5
Intervention	46	Male	Farming	Yes	19.7	30.8	32	50.7	72.1	66.2
Intervention	25	Male	Farming	No	25.5	28.3	38.7	35.8	75	69.7
Intervention	35	Female	Farming	Yes	20.5	29.3	25.4	34.9	70.4	68.6
Intervention	18	Female	Farming	Yes	16.4	26.6	34.2	58.1	57.9	68.5
Intervention	43	Female	Farming	Yes	23.4	32.8	34.6	49.4	75.2	65.1
Intervention	46	Female	Farming	Yes	26.5	29.2	31.7	59.2	46.9	57
Intervention	32	Female	Farming	Yes	25.2	26.9	32.2	45.7	54.5	61.9
Intervention	58	Female	Farming	Yes	22.7	29.3	26.2	47.7	69.6	74.8
Intervention	22	Female	Farming	Yes	25.6	36.6	25.1	51	59.4	68.2
Intervention	19	Male	Pastoralism	Yes	22.1	31.1	27.2	63.5	64.3	69.8
Intervention	41	Female	Farming	Yes	21.7	34	30.2	58	73.8	72.3
Intervention	52	Male	Farming	Yes	15.2	23.5	27.9	38.6	61.8	80.3
Intervention	60	Male	Other	Yes	22.3	29	26	49.9	61.9	69.8
Intervention	32	Male	Pastoralism	Yes	27.7	25.9	26.2	57.2	54.5	56.3
Intervention	52	Male	Farming	Yes	14.5	27.8	27.9	62.4	69.7	69.2
Intervention	38	Female	Farming	Yes	15.9	26.8	32.6	81.3	72.6	40.5
Intervention	36	Male	Farming	Yes	20	34.8	24.7	37.5	81.2	66.5
Intervention	49	Female	Other	No	15.7	32.6	31.4	56.8	50.5	57
Intervention	47	Male	Farming	Yes	24.3	26.9	31.3	59.6	54.1	67.5
Intervention	18	Male	Farming	Yes	14.1	28	27	55.2	52.9	71
Intervention	57	Male	Farming	Yes	24.3	31.2	30.3	50.3	52.4	57.4
Intervention	56	Female	Other	Yes	25.6	33.3	34	45.7	78.3	59
Intervention	30	Female	Farming	Yes	24.2	33.9	27.8	49.2	51.1	74.6
Intervention	43	Male	Farming	Yes	21.5	32.3	25.9	52.4	56.2	67.1
Intervention	44	Male	Pastoralism	Yes	23.6	36.9	25.2	52.4	64.6	50.9
Intervention	41	Female	Farming	No	16.5	31.5	25.6	62	57.2	80.2
Intervention	31	Male	Farming	Yes	22.5	28.1	32.3	50.1	76.3	65.6
Intervention	29	Male	Farming	Yes	18.8	26.6	28.9	54.5	68.6	62
Intervention	38	Male	Farming	Yes	25.1	25.6	22.5	63.8	61.5	58.1
Intervention	53	Male	Farming	Yes	24.4	25.1	34.2	55.5	78	51.5
Intervention	45	Male	Farming	Yes	18	32.4	28.4	62.1	74	55.4
Intervention	33	Male	Pastoralism	Yes	22.9	36	31.1	47.9	80.2	50.1
Intervention	48	Female	Other	Yes	23.1	30.2	31.6	48.1	46.1	62.5
Intervention	18	Female	Farming	Yes	19.4	36.9	25.7	21.3	65.2	52.9
Intervention	53	Female	Farming	Yes	21.5	29.9	24.1	53.1	62.1	54.3
Intervention	18	Female	Pastoralism	Yes	23.5	32.2	25.1	35.3	64.6	81.4
Intervention	33	Female	Pastoralism	Yes	19.5	23.6	28.3	40.6	68.5	50.8
Intervention	24	Female	Farming	Yes	17.7	33	30.9	64.5	68.5	57.7
Intervention	21	Female	Farming	Yes	22.4	27.3	36.7	62.4	70	66.4
Intervention	53	Male	Other	No	27.6	33	32.8	51.7	62.7	68.2
Intervention	32	Male	Farming	No	20.8	34.8	21	54	61.9	64
Intervention	43	Female	Farming	No	19.9	31	28.5	59	67	57.3
Intervention	37	Female	Pastoralism	Yes	18.1	31.5	19.8	59.6	55.3	45
Intervention	44	Female	Farming	Yes	26.2	30.3	33	42.5	70.7	63.6
Intervention	39	Female	Farming	Yes	25.1	32.3	28.3	55.1	79.8	77.3
Intervention	22	Male	Farming	Yes	20.8	37.1	29.2	38.9	80.3	44.9
Intervention	51	Male	Pastoralism	Yes	18.1	29.8	28.1	55.1	59.1	60.9
Intervention	32	Female	Pastoralism	Yes	18.1	30.4	29.4	43.5	57.6	41.5
Intervention	18	Male	Farming	Yes	17.8	22.9	26.3	48.9	67.7	70.7
Intervention	33	Male	Farming	Yes	19.3	31.4	29.5	40.1	81.2	70.6
Intervention	57	Female	Farming	No	19	26.8	25.2	52.4	56.9	55.2
Intervention	49	Male	Pastoralism	Yes	18.3	29	30.3	42.3	66.5	63.5
Intervention	34	Female	Farming	Yes	26.1	31.7	30.2	80	53.4	68.7
Intervention	34	Female	Farming	Yes	28.1	23.5	31.1	38.2	94.8	67.8
Intervention	34	Male	Farming	Yes	16.8	31.6	28.7	67	67.5	67.1
Intervention	65	Male	Farming	Yes	19	30.8	33.4	49.6	86	65
Intervention	43	Male	Other	Yes	17.4	32.5	36.6	50.8	61.8	88.1
Intervention	44	Female	Farming	Yes	22.7	27.3	22.8	58.6	77.8	77.2
Intervention	51	Male	Pastoralism	Yes	20	34.1	23.9	38.4	59	65.1
Intervention	41	Male	Farming	Yes	17.1	31	28.4	63.4	72.1	63.3
Intervention	35	Female	Farming	Yes	28.3	27	27.2	50.4	62.4	67.5
Intervention	36	Male	Other	Yes	23.4	24.5	31	23.1	60.1	81.3
Intervention	37	Male	Farming	Yes	17.3	27.7	31	52.5	70.3	71.7
Intervention	38	Male	Farming	Yes	27.7	33.2	30.3	49.3	65.4	83.6
Intervention	47	Male	Pastoralism	Yes	16.6	31.5	22.3	45.4	50.9	72.6
Intervention	39	Female	Farming	Yes	24	21.4	29.9	48.5	62.6	65.5
Intervention	48	Male	Farming	Yes	31.6	28.5	36.7	69.5	49.3	54.2
Intervention	37	Male	Farming	Yes	20.8	30.3	31.2	58.6	59	77
Intervention	39	Female	Pastoralism	Yes	20.2	37.2	28.8	33.4	60.2	55.9
Intervention	18	Female	Farming	Yes	22.1	34.8	31.6	30.4	67.1	84.9
Intervention	50	Male	Farming	Yes	30.7	29.1	25.6	44	62.8	48.4
Intervention	43	Female	Other	Yes	27.6	30.5	30.8	66.8	74.6	48.1
Intervention	51	Female	Farming	No	19.5	24.5	29	62.2	76.2	65.4
Intervention	18	Male	Farming	Yes	22.7	19.6	24.4	38.8	69.7	65.9
Intervention	65	Female	Farming	No	25.3	28.3	30.1	38.8	75.4	79.4
Intervention	36	Female	Other	Yes	19.6	33.7	29.3	51.1	56.6	76.6
Intervention	52	Male	Other	Yes	16.6	30.5	32.4	47.8	82.4	69.9
Intervention	25	Female	Farming	Yes	26	26.9	29.6	29.7	51.3	67.3
Intervention	46	Female	Farming	Yes	23.5	33.4	29.9	46.5	52.9	65
Intervention	25	Female	Farming	Yes	22.7	36.8	29.7	37.3	71.7	69.5
Intervention	30	Male	Farming	Yes	26	24	29.6	33.8	84.2	63.4
Intervention	63	Male	Farming	Yes	16.6	29.6	33.8	39.4	66.4	49.9
Intervention	36	Female	Farming	Yes	20.4	27.7	32	32.9	82.8	38
Intervention	41	Male	Other	Yes	32.5	30	25.3	47.2	62.6	63.3
Intervention	49	Female	Farming	Yes	23.8	28	28.6	35.2	61.4	59.5
Intervention	44	Male	Pastoralism	Yes	24	40	23.3	45.5	71.1	37.4
Intervention	40	Male	Farming	Yes	21.8	29.3	35.2	51.4	70.9	82.1
Intervention	43	Female	Farming	Yes	13.7	31	26.2	57	89.3	53.9
Intervention	69	Female	Farming	Yes	18	30.5	26	45.1	63.2	61.1
Intervention	37	Male	Pastoralism	Yes	25.2	24.9	36.6	67.8	55.4	56.2
Intervention	41	Male	Farming	Yes	19.1	30.6	26.7	56.4	66.6	61.4
Intervention	52	Female	Farming	Yes	20.7	24.1	25.2	62.4	69.8	73.9
Intervention	52	Female	Farming	Yes	22.6	36.8	31.8	57.4	76.2	64.3
Intervention	53	Female	Pastoralism	Yes	17.3	33.3	29.1	46.1	63.5	79.9
Intervention	46	Male	Farming	Yes	16	27.6	25.4	44.8	48.6	61.6
Intervention	23	Male	Farming	No	21.3	29.1	30.5	49.7	73	45.9
Intervention	59	Female	Farming	No	19.8	33.8	31.7	60.1	59.6	55.3
Intervention	23	Female	Pastoralism	Yes	22.4	30.9	32.6	47.1	76.8	45
Intervention	42	Male	Farming	Yes	15.4	23.4	30.1	28.6	73.3	61.4
Intervention	28	Female	Farming	Yes	19.2	30.5	32.7	41	61.2	56.6
Intervention	37	Male	Farming	Yes	24.3	34	32.6	13.2	58.7	65.5
Intervention	42	Male	Farming	Yes	33.8	20.7	27.2	42.6	58.7	60.2
Intervention	42	Female	Farming	No	21.9	30.3	36.1	42.6	68.4	42.6
Intervention	44	Male	Farming	Yes	24.2	26.5	31.8	44.6	70.2	66.4
Intervention	59	Female	Farming	Yes	23.4	34.7	34.8	54.6	64.5	59.9
Intervention	44	Male	Farming	No	22.6	28	28.5	69.5	67.5	61.1
Intervention	35	Male	Other	Yes	24.3	27.6	32.6	38.3	85.5	56.7
Intervention	51	Female	Farming	Yes	17.4	33	30.2	53.2	84.6	75.4
Intervention	53	Male	Farming	No	19.9	26.3	33.1	28.8	58.1	48.5
Intervention	22	Female	Farming	Yes	22.4	30.1	27.4	53.5	78.2	67.9
Intervention	46	Male	Farming	Yes	17.3	30.9	26.8	50	65.8	52.8
Intervention	47	Female	Farming	Yes	23.2	29	34.2	78.5	57.4	85.5
Intervention	34	Male	Farming	Yes	13.4	24.7	30.1	43.9	76.6	76.9
Intervention	56	Female	Farming	Yes	24.8	26.4	33.1	47.3	59	70.1
Intervention	36	Female	Pastoralism	Yes	20.8	29.3	23.3	32.9	58.9	76.3
Intervention	40	Female	Other	Yes	24.3	22.4	25.8	65.2	49.1	78.8
Intervention	36	Female	Pastoralism	Yes	25.6	30.1	27	37	64.6	49.1
Intervention	38	Male	Farming	Yes	27.3	28.8	34.4	59.8	57.3	69
Intervention	24	Male	Pastoralism	Yes	22.5	32	34.3	66.7	81.6	58.8
Intervention	20	Female	Farming	Yes	14.1	32.3	29.5	30	64.7	79.7
Intervention	59	Female	Farming	Yes	14	25.4	31.1	49.2	66.1	49.9
Intervention	27	Male	Other	Yes	16.1	27.8	29.8	50.2	60.4	69.7
Intervention	25	Male	Farming	Yes	24.4	26.2	25	30.4	57.3	53.9
Intervention	18	Female	Farming	No	15.5	27.7	29.3	29.6	55.2	82.2
Intervention	30	Female	Farming	Yes	20.4	28.8	25.4	26	92.2	61.6
Intervention	21	Female	Pastoralism	Yes	19.6	34.2	27.5	28.5	64.9	68
Intervention	59	Male	Pastoralism	Yes	22.9	27.5	28.2	58.3	58.7	71
Intervention	51	Male	Farming	Yes	24.4	33.3	35.9	24.5	66.9	50.7
Intervention	29	Male	Farming	Yes	21.8	30.8	29.7	53	70	66.4
Intervention	67	Male	Farming	Yes	24.8	35.2	27.4	64.2	53.9	79.5
Intervention	51	Female	Farming	No	16.8	28.4	31.6	58.4	58	68.7
Intervention	34	Female	Farming	Yes	25.7	26.6	26.4	35.8	70.9	49
Intervention	18	Male	Farming	Yes	22	30.4	40	76.9	59.6	56
Intervention	68	Male	Other	Yes	24.6	23.5	30.9	51.9	52.1	83.4
Intervention	20	Male	Pastoralism	Yes	19.2	30.4	19	44.3	59.7	75.7
Intervention	18	Female	Farming	Yes	12.8	32	25.8	70.5	55	74.1
Intervention	51	Male	Farming	Yes	24.2	34.1	36.5	60.5	80.1	54.4
Intervention	70	Male	Farming	Yes	20.8	31.4	29.7	45	70.5	62.9
Intervention	56	Female	Farming	Yes	26.4	29.2	27.2	53.5	37.9	57.7
Intervention	45	Female	Farming	Yes	23.2	37.4	30.8	57.2	61.3	53
Intervention	46	Female	Farming	Yes	33.8	29.8	22.6	63.1	75.6	73.6
Intervention	49	Male	Other	Yes	26.7	25.7	25.1	37.1	72.3	55.8
Intervention	48	Male	Other	Yes	20.4	29.7	23.3	69.8	59.9	52.1
Intervention	42	Male	Pastoralism	Yes	14.7	24.6	27.6	40.9	76	75.8
Intervention	39	Female	Farming	Yes	17.7	25	35.7	51.4	60.4	84.3
Intervention	37	Female	Pastoralism	Yes	17.5	30.7	31.5	36.6	57.6	63.9
Intervention	28	Female	Farming	Yes	19.2	24.6	31.1	25.3	58.5	47.6
Intervention	34	Male	Farming	Yes	20.9	27.4	26.4	37.1	79.6	63
Intervention	18	Female	Farming	Yes	22.7	25.2	32.3	48.2	65.7	50.5
Intervention	37	Male	Other	Yes	27.2	30.3	25.9	61.6	59.7	58
Intervention	25	Male	Farming	Yes	17.7	27	28.3	49.1	55.9	63.8
Intervention	24	Male	Farming	Yes	15.6	31.9	32.2	64.4	62.2	72.6
Intervention	40	Female	Farming	Yes	24.9	31.6	28.8	55.2	60.2	65.4
Intervention	56	Male	Farming	Yes	27	24.7	32.9	43.3	55.6	54.6
Intervention	50	Female	Farming	Yes	19.3	33.4	28.3	64.9	61.9	80.9
Intervention	18	Female	Farming	Yes	25.8	29.1	34.7	51.5	69.2	71
Intervention	25	Male	Other	Yes	24.6	25	30.8	40.5	100	81.7
Intervention	50	Female	Pastoralism	Yes	14.2	31.3	25.5	50.6	61.4	63.4
Intervention	25	Male	Other	Yes	18.7	36.7	26.9	46	66.9	68.6
Intervention	35	Male	Farming	Yes	19.4	29	28.2	48.8	55.9	48.6
Intervention	45	Female	Farming	Yes	29.8	23.4	33	37.7	86.8	72.7
Intervention	26	Female	Farming	Yes	23.5	33.4	36.6	60.2	67	51.2
Intervention	39	Male	Other	Yes	19.3	35.9	23	35.3	70.9	57.1
Intervention	21	Female	Farming	No	18.5	25.6	27.5	46.6	70.3	58.1
Intervention	30	Female	Farming	Yes	14.8	26.7	34.1	53	95.5	66.5
Intervention	42	Male	Farming	Yes	25.9	29.9	28.9	39.2	75	51.7
Intervention	18	Male	Farming	Yes	23.1	22.3	28.5	48.1	68.4	91.4
Intervention	44	Female	Farming	Yes	24	37.9	31.5	37.9	66.5	49.8
Intervention	38	Male	Farming	Yes	16	29.6	23.6	32.9	66.8	40.2
Intervention	45	Female	Farming	No	24.5	30	31.6	68.5	57.4	62.2
Intervention	41	Female	Farming	Yes	20.4	31.2	30.4	58.9	62.2	67.4
Intervention	56	Male	Farming	Yes	18.3	28.8	29.9	48.6	77.9	78.8
Intervention	40	Female	Farming	Yes	23.6	27.8	33.5	58.8	58.1	74.9
Intervention	33	Male	Farming	No	16.4	26.1	28.8	57.9	61.5	73.6
Intervention	40	Female	Other	Yes	22.2	25.2	29.3	44.2	62.4	72.1
Intervention	45	Male	Farming	Yes	20.3	31.4	29.8	60.8	57.3	71.8
Intervention	39	Female	Farming	Yes	25.9	35.1	20.7	38.1	67.5	64.4
Intervention	39	Male	Farming	Yes	25.1	33.5	33.4	59.1	65.3	50.2
Intervention	29	Female	Farming	No	21.8	28.7	31.5	29.5	54	50.4
Intervention	30	Male	Pastoralism	Yes	22.6	29	31.3	44.4	58.4	59.8
Intervention	20	Male	Other	Yes	23.9	36.1	30.5	31.9	63.6	61.9
Intervention	61	Male	Pastoralism	Yes	21.4	26.7	34.7	53.4	55.8	76.3
Intervention	22	Female	Farming	No	18	23.3	30	64.7	51.1	64.9
Intervention	29	Male	Farming	Yes	19.4	30.8	28.2	58.6	54.4	58.4
Intervention	29	Female	Other	Yes	16.3	33.1	22	43.2	63.7	92.1
Intervention	50	Female	Farming	Yes	25.3	20.1	23.9	34.3	59.1	72.2
Intervention	34	Female	Pastoralism	Yes	23.1	31.4	27.9	84.6	70.1	55.3
Intervention	54	Male	Other	No	19.6	25.4	29.5	81.7	76.9	58.7
Intervention	29	Female	Farming	Yes	18.4	24.3	26.7	33.1	56.6	34.9
Intervention	42	Male	Farming	Yes	22.4	28.7	28.2	56	56.2	84.6
Intervention	27	Female	Farming	No	15.5	25.3	25.4	34	72.3	75.5
Intervention	66	Female	Farming	Yes	16.9	22.9	33	32.1	66.4	73.8
Intervention	23	Male	Farming	Yes	21.3	30.2	27.9	48.9	77.8	57.3
Intervention	42	Male	Farming	Yes	31.7	29.6	33.9	49	63.3	82.8
Intervention	46	Male	Farming	Yes	23.3	23.1	28	59.7	68	66.4
Intervention	43	Male	Farming	Yes	22.2	24.3	30.6	22.3	75.8	41.4
Intervention	36	Female	Farming	Yes	16.5	31.6	31	47.7	60.4	61.4
Intervention	36	Male	Pastoralism	Yes	17.5	31.9	29.8	52	42.9	56
Intervention	39	Female	Pastoralism	Yes	27.1	19.5	24.6	81.8	89.3	56.2
Intervention	36	Male	Farming	Yes	19.5	24.9	27.7	37.7	76.7	42.7
Intervention	51	Female	Pastoralism	Yes	21.7	29.5	20.6	53.3	58.3	66.7
Intervention	67	Female	Farming	Yes	23.9	31.5	35.8	66.8	59.8	48.6
Intervention	31	Female	Farming	Yes	19.6	31.4	15.3	74.6	43.5	76.1
Intervention	20	Male	Pastoralism	Yes	19.3	32.2	32.6	69.2	72.9	51.2
Intervention	37	Female	Farming	Yes	14.2	27	29.5	50.4	61.8	52.1
Intervention	71	Male	Farming	Yes	16.3	30.5	22	46.5	82.6	49.7
Intervention	28	Male	Farming	No	23.9	28.3	30.2	38.7	59	74.4
Intervention	59	Female	Pastoralism	Yes	19.6	27.6	24.6	65.9	51.2	63.1
Intervention	60	Female	Farming	Yes	24.2	23.9	30.9	41.9	56.6	62
Intervention	31	Male	Pastoralism	Yes	14.7	31	28.9	44.7	73.3	61.5
Intervention	45	Female	Farming	Yes	24.8	23.4	30	51.2	45	74.6
Intervention	59	Female	Farming	Yes	21.2	25.2	27.6	34	77.1	80.5
Intervention	33	Male	Farming	No	15.2	32.5	34.6	52.2	57.9	59.9
Intervention	35	Male	Farming	Yes	26.1	29.2	24.9	39.6	68.4	45
Intervention	31	Female	Farming	Yes	15.5	33.9	26.3	58	42.3	70.4
Intervention	25	Male	Farming	Yes	25.9	28.5	28.4	82.7	48.2	68.8
Intervention	30	Female	Farming	Yes	21.3	27.6	28.7	61.1	72.4	50.6
Intervention	22	Female	Farming	Yes	17.6	34.3	24.5	29.6	59.5	32.2
Intervention	39	Female	Farming	Yes	29.2	28.2	20.9	52	74.7	53.4
Intervention	28	Male	Pastoralism	Yes	23.1	30.9	30.6	41	58.6	85.8
Intervention	41	Female	Pastoralism	Yes	26.5	29.2	30.4	52.1	59	47.5
Intervention	18	Male	Pastoralism	Yes	23.2	30.3	36.1	56.5	50.2	65.6
Intervention	42	Male	Pastoralism	Yes	20.5	28.9	34.2	42.1	65.2	79.4
Intervention	49	Male	Farming	Yes	17.7	33.2	29.4	55	57.4	50.5
Intervention	18	Female	Farming	Yes	20.6	30.1	26.3	59.4	71.9	61.1
Intervention	43	Female	Other	Yes	22.1	28.5	33.7	44.2	83.2	64.6
Intervention	54	Male	Pastoralism	Yes	24.8	30.8	25.6	56.7	70	73.5
Intervention	22	Male	Farming	Yes	19.7	23.8	32.8	30.3	83.2	54.4
Intervention	60	Male	Farming	Yes	23.6	33.7	23.2	58.6	62.2	46.5
Intervention	44	Male	Farming	Yes	28.4	23.9	37.2	78.4	83.2	77.5
Intervention	29	Female	Farming	Yes	22.1	27.2	24.7	60.3	89.2	62.8
Intervention	37	Female	Farming	No	13.2	28	25	62.4	61.7	48.4
Intervention	45	Female	Other	Yes	21.6	30.8	21.3	70.6	58.6	71.8
Intervention	39	Female	Farming	Yes	21	36.1	27.5	46.9	54.6	69.4
Intervention	45	Female	Farming	No	20.9	33.8	30.9	58.4	52.2	84.1
Intervention	26	Male	Farming	Yes	14.7	24.1	26.6	50.4	62.7	49
Intervention	40	Male	Pastoralism	Yes	22.6	26.3	25.5	51.6	66.4	55.3
Intervention	20	Male	Farming	Yes	19.2	24.3	23.2	71.4	59.6	67.4
Intervention	37	Male	Farming	No	21	24.7	30.2	58.9	79.4	80.1
Intervention	26	Female	Farming	Yes	25.4	27.5	32	27.2	64	81
Intervention	29	Female	Farming	Yes	18	34.9	29.8	39.3	79.4	74.3
Intervention	54	Female	Farming	Yes	21	28.8	31.9	41	69.9	55.1
Intervention	52	Male	Pastoralism	Yes	20.6	29.3	24.1	54.8	80.3	55.2
Intervention	46	Male	Farming	Yes	20.7	30.7	26.5	52.4	51.3	66.8
Intervention	24	Female	Farming	Yes	19.5	26.1	28.3	48.8	77.9	38.9
Intervention	34	Female	Farming	Yes	19.8	29.5	34.3	58.9	68.3	81.8
Intervention	54	Male	Farming	No	28.4	30.8	34.3	74.2	63	71.2
Intervention	40	Female	Farming	No	19.6	39.4	32.4	34.6	66.6	83.7
Intervention	68	Female	Farming	Yes	22.5	33.4	32.3	72.4	87.7	51.9
Intervention	43	Male	Farming	Yes	21.8	36.2	25.9	36.9	73.8	53.3
Intervention	41	Male	Pastoralism	No	21.7	29.9	29.5	15	76.1	81.5
Intervention	34	Female	Farming	Yes	23.4	31.9	22.3	58.3	78.3	60.2
Intervention	40	Female	Pastoralism	Yes	18.7	30.8	32.3	53.2	64.8	71.5
Intervention	36	Male	Farming	Yes	27.3	22.8	28.1	41.1	73.4	38.7
Intervention	47	Female	Pastoralism	Yes	17.5	20.2	37.5	65.7	62.5	57.8
Intervention	50	Female	Farming	Yes	20.7	25.4	30.2	15.8	63.7	61.9
Intervention	28	Female	Farming	Yes	16.4	34.6	26	59.3	62.5	69.6
Intervention	21	Male	Pastoralism	Yes	25.2	28.3	28	33.2	63.4	67.1
Intervention	18	Female	Farming	Yes	17.5	32.8	26.5	62.5	47.6	66.4
Intervention	45	Male	Farming	Yes	24.6	34.9	26.7	34.5	63.1	67.1
Intervention	24	Female	Pastoralism	Yes	22.5	24.8	29	39.4	68.3	66.6
Intervention	18	Female	Farming	Yes	22.1	35.6	25.1	35.8	60.4	56
Intervention	43	Male	Farming	Yes	26.1	25.3	28.9	50.8	59	58
Intervention	70	Male	Farming	Yes	18.9	29	21	46.3	63.6	76.7
Intervention	38	Female	Farming	Yes	27.6	25.6	29.8	36.6	78.3	62.3
Intervention	49	Female	Farming	Yes	19.8	30.7	26	30.4	83.5	54.7
Intervention	39	Male	Other	Yes	23.2	29.2	23.6	49.9	76.8	75.2
Intervention	37	Male	Other	Yes	20.6	32.9	32.1	27.5	94.6	58.5
Intervention	50	Male	Farming	Yes	24	33.7	21.8	59.6	88.5	72.3
Intervention	34	Male	Farming	Yes	17.2	36	31.7	50.9	65.7	55.1
Intervention	42	Female	Farming	Yes	21.8	32.7	31	45.2	61.8	44.5
Intervention	42	Female	Farming	Yes	21.5	33	25.4	71.5	43.7	59
Intervention	29	Female	Farming	No	23.2	28.1	28	36.5	49.9	53.6
Intervention	51	Male	Farming	Yes	23.1	29.1	30.2	51.3	50.9	60.2
Intervention	36	Female	Pastoralism	Yes	17.8	31	30.1	57	64.8	59.3
Intervention	28	Male	Pastoralism	Yes	26.9	25	32.8	52.1	58.7	66.8
Intervention	45	Female	Farming	No	21.2	34.2	32.1	28	64.9	60.7
Intervention	27	Male	Farming	Yes	24.5	29.3	33.3	38.8	75.5	63.5
Intervention	38	Male	Farming	No	16.1	30.6	33.8	26.4	74.2	44.1
Intervention	38	Female	Farming	Yes	19.7	23.9	29.6	50.9	59.1	83.4
Intervention	52	Male	Pastoralism	Yes	25.9	28.4	27.9	51.1	74	81.7
Intervention	44	Female	Farming	Yes	28.3	33.2	28.6	44.5	70.3	71.7
Intervention	38	Female	Farming	Yes	23.2	31.4	27.7	43.7	67.7	68.5
Intervention	49	Female	Farming	Yes	21	33	35	45.7	76.4	64.8
Intervention	56	Female	Other	Yes	16.9	28.5	26	40.7	68.1	43.1
Intervention	45	Male	Farming	No	24.7	30.3	33.8	35	73.1	86.9
Intervention	38	Male	Farming	Yes	22.7	29.4	27.1	59.8	57.8	51.4
Intervention	21	Female	Pastoralism	Yes	11.5	32.4	33.6	39.4	56.5	56.9
Intervention	24	Female	Farming	Yes	14.1	30.8	32.1	55.2	74.7	71.3
Intervention	34	Male	Other	Yes	22.9	28.3	28.9	35.1	62.7	86.7
Intervention	30	Female	Farming	Yes	17.9	19.8	30.2	38.1	65.9	71.6
Intervention	36	Male	Farming	Yes	17	30.5	24.6	60.1	68.8	65.3
Intervention	39	Male	Pastoralism	No	21	23.3	31.5	46.8	62.1	59
Intervention	45	Male	Farming	Yes	22.8	32.5	33	38.6	71	72.5
Intervention	37	Male	Other	Yes	27.4	33	34.6	50.2	67.5	60.3
Intervention	44	Male	Pastoralism	Yes	18	20.9	27.8	63.5	60.3	53.2
Intervention	39	Male	Farming	Yes	23.2	31	38.1	62.2	55.3	44.8
Intervention	18	Male	Farming	Yes	17.1	30.9	27.8	53.2	74.7	70.3
Intervention	26	Male	Farming	Yes	19.3	31.3	27.3	59.9	56.9	74.3
Intervention	36	Male	Farming	Yes	22.2	25	28.4	53.4	72.6	55.5
Intervention	22	Female	Farming	Yes	20.8	31.7	28.5	37.6	58.7	73.6
Intervention	46	Male	Farming	Yes	15.7	24.9	23.2	35	53.7	75.6
Intervention	58	Male	Farming	Yes	23.6	32.5	24.5	72.1	53.7	37.5
Intervention	54	Male	Pastoralism	Yes	24.5	31.5	24.1	28.4	63.8	43.6
Intervention	35	Male	Pastoralism	No	31.3	28.5	30.1	53.7	68.6	63.1
Intervention	57	Male	Farming	Yes	22.3	31.5	35.2	35.7	72.8	59.4
Intervention	40	Male	Farming	Yes	22.1	26.1	26.4	46.3	57.1	63.7
Intervention	34	Female	Farming	Yes	22.7	27.6	28.6	27	67.6	58.7
Intervention	30	Female	Pastoralism	Yes	15.7	34.3	25.8	73.8	75.5	63.5
Intervention	34	Female	Farming	Yes	16	34.2	31.8	57.9	70.8	61.1
Intervention	33	Female	Other	Yes	21.1	25.5	30.2	61.3	82.6	64.8
Intervention	40	Male	Other	Yes	11.8	27.4	32.9	58.5	74.2	62
Intervention	40	Male	Other	Yes	16.7	27.6	25	42.9	57.9	60.1
Intervention	38	Female	Farming	Yes	19.3	30	28.9	56.6	64.4	84.9
Intervention	44	Male	Farming	Yes	25.6	29.3	28.1	34.4	71.7	46.3
Intervention	53	Male	Other	Yes	22.5	34.8	28.4	38.8	84.5	89.5
Intervention	50	Male	Farming	Yes	15	35.8	33.2	27.6	61.5	53.1
Intervention	19	Female	Farming	Yes	21.2	36.8	26.8	46.6	51.4	58.8
Intervention	18	Female	Farming	Yes	23.9	38.2	27.3	32.9	72.8	58.7
Intervention	50	Female	Farming	Yes	24.4	23.6	25.9	63.7	74.5	80.1
Intervention	20	Male	Other	Yes	25.8	29.1	37.9	59.2	63.1	68.8
Intervention	35	Male	Farming	Yes	26.4	27.1	25.2	55.5	69.4	71.3
Intervention	23	Female	Pastoralism	Yes	23.8	26.3	31.5	73	55.1	80.4
Intervention	18	Female	Farming	Yes	23.4	35.3	23.5	47.5	64.3	52.6
Intervention	45	Male	Farming	Yes	22.4	31.4	31	62.6	76	65.6
Intervention	48	Female	Pastoralism	Yes	24.9	23.6	24.4	42.5	63.4	85.9
Intervention	31	Female	Other	Yes	18.1	39.9	29.7	26.5	46.5	51.9
Intervention	18	Female	Other	No	20.5	22.7	30.4	49.9	51	75.8
Intervention	31	Female	Pastoralism	Yes	18.5	28.4	28.8	63.4	66	57.9
Intervention	43	Male	Farming	Yes	23.2	30.1	32	25.5	61.8	62.1
Intervention	19	Female	Farming	Yes	20.3	25.4	31	58.5	59.1	70.3
Intervention	40	Female	Farming	Yes	25.7	31.9	26.3	51.4	70.6	54.1
Intervention	38	Female	Farming	No	21.6	27.4	31.1	45.8	77.5	69.9
Intervention	46	Female	Farming	Yes	25.9	33	30	41.3	46	69
Intervention	40	Female	Farming	No	12.5	31.4	33	44	59.1	70
Intervention	26	Female	Farming	Yes	18.4	20	23.1	45.4	52.5	62.4
Intervention	54	Male	Farming	Yes	25.3	23.8	29.6	42.4	62	52.4
Intervention	36	Female	Farming	No	21.5	33.1	29.5	36.5	72.3	65.5
Intervention	38	Female	Farming	Yes	25.8	31.4	27.6	66	65.3	66.3
Intervention	26	Male	Pastoralism	Yes	22.5	25.8	33.4	56.9	55.7	79.6
Intervention	32	Male	Farming	Yes	17.5	27.2	26.2	37.5	71.9	79.3
Intervention	27	Female	Farming	Yes	28.9	29.5	32	48.2	61.6	56.2
Intervention	36	Male	Pastoralism	Yes	18.6	21.9	26.1	49.4	64.8	77.1
Intervention	60	Female	Farming	No	18.3	38.7	34.5	67.1	68.7	66.4
Intervention	20	Male	Other	Yes	24.8	26	30.8	39.3	75.1	77.2
Intervention	18	Female	Farming	Yes	17.6	29.9	22.7	58.2	62.5	72.5
Intervention	57	Male	Farming	Yes	16	36.3	33.8	37.8	85.8	77
Intervention	35	Male	Farming	Yes	18.2	29.1	31.4	40.1	63.2	58.3
Intervention	29	Male	Pastoralism	Yes	24.8	31.1	29.5	47.7	40.8	62.2
Intervention	52	Female	Farming	Yes	30.4	26.1	26.5	31	57.3	65
Intervention	30	Male	Farming	Yes	21.4	27.7	25.6	33.5	64.6	62.4
Intervention	62	Male	Other	Yes	18.4	26.2	31.2	50	73.8	76.8
Intervention	47	Female	Pastoralism	Yes	26.6	34.8	22.8	48.2	82.1	66
Intervention	32	Male	Pastoralism	Yes	18.8	27.2	26.3	50.6	69.5	76.3
Intervention	66	Female	Other	No	19.5	26.9	32	60	67.9	71
Intervention	30	Female	Pastoralism	Yes	23.1	26.4	23.3	43.4	66.5	58.7
Intervention	48	Female	Farming	Yes	26.2	31.3	23.5	41.4	75	75.9
Intervention	42	Male	Farming	Yes	21.7	32.1	31.2	56.4	74.1	49.2
Intervention	55	Female	Pastoralism	Yes	19.9	22	28	42.4	49.8	66.6
Intervention	58	Male	Farming	Yes	31.1	30.1	35.9	57.7	46.6	67.5
Intervention	39	Female	Farming	Yes	18.6	31	27.8	22.8	67.8	69.7
Intervention	28	Female	Farming	Yes	19	35.3	22.7	51.6	61.8	68
Intervention	44	Male	Farming	Yes	19.8	25	33.7	50.9	59.9	70.3
Intervention	29	Male	Farming	Yes	23.7	25.4	23.6	67.3	71.3	73.3
Intervention	64	Male	Pastoralism	Yes	19.4	32.3	25	56.8	71.3	59.2
Intervention	40	Male	Pastoralism	Yes	24.8	29.6	27.7	61	61.2	70.3
Intervention	33	Female	Farming	Yes	21.2	35.2	29.8	48.1	54.9	63.8
Intervention	40	Female	Farming	Yes	20.1	34.1	30.7	52.4	42.8	48.7
Intervention	21	Male	Farming	Yes	19	30.9	33	35.7	49.4	61
Intervention	26	Female	Farming	Yes	21.3	29.5	18.5	41.9	68	83.8
Intervention	54	Female	Farming	Yes	23.3	29.2	25.2	54.5	74.1	45.4
Intervention	30	Female	Farming	Yes	21.3	29.7	33.4	73.2	77.3	67.5
Intervention	25	Male	Farming	Yes	22.4	30	25.4	59.9	56.2	72.3
Intervention	45	Female	Farming	Yes	18.1	35.3	28.9	56.8	76.8	56.8
Intervention	53	Female	Farming	No	18.4	21.9	34.6	61.2	58.9	59.5
Intervention	47	Female	Farming	Yes	21.4	28.2	28.4	54.4	63.3	43.6
Intervention	51	Male	Other	No	21.9	30.6	28	50.6	79	78.8
Intervention	28	Male	Pastoralism	Yes	21.6	27.4	28.4	46.7	66.4	66.9
Intervention	20	Female	Farming	Yes	18.9	28.7	34.4	39.3	63.3	80.1
Intervention	57	Female	Other	Yes	21.7	28.1	22.5	34.2	64.5	64.1
Intervention	34	Female	Farming	Yes	21.5	34.9	36.4	46.7	62.2	46.8
Intervention	35	Male	Farming	Yes	20.9	28.1	28.2	46.4	72.9	70.1
Intervention	55	Female	Farming	Yes	18.7	27	27.7	38.9	53.3	76.1
Intervention	45	Male	Farming	Yes	23.6	32.8	25.8	53.8	70.3	60.7
Intervention	44	Male	Pastoralism	Yes	21.4	27.7	24.4	62.8	48.8	83.2
Intervention	66	Female	Pastoralism	Yes	18.2	29.1	19.5	42.6	90.7	62.3
Intervention	30	Male	Farming	Yes	20.9	25.5	34.1	50.4	77.8	66.8
Intervention	50	Male	Farming	Yes	19	28.2	20	40.8	70.4	78.2
Intervention	39	Female	Farming	Yes	21.4	29.7	28.9	57.5	68	56.8
Intervention	42	Female	Pastoralism	Yes	27.4	24.9	27.3	54.1	55.8	64.1
Intervention	58	Male	Farming	Yes	22	29.4	30.3	40.7	76.3	43.7
Intervention	45	Female	Farming	Yes	22.2	31.8	20.9	53.6	72.1	65.7
Intervention	45	Male	Other	Yes	27.4	22	25.7	21.4	32.9	61.3
Intervention	52	Male	Farming	Yes	22.5	27.3	31	55.6	70.5	62.2
Intervention	33	Male	Pastoralism	Yes	23.2	39.8	29.9	39.5	72	71.2
Intervention	27	Male	Farming	Yes	22	29	26.4	36	68.7	51.8
Intervention	25	Female	Farming	Yes	19.8	34.2	29.5	38	54	61.3
Intervention	18	Male	Pastoralism	No	23.3	29.7	36.2	39.3	43.3	74.4
Intervention	65	Female	Farming	Yes	28.5	28.5	33.6	32.5	76.5	79.7
Intervention	24	Female	Farming	Yes	15.9	33.4	33.1	63.8	50.6	58.5
Intervention	35	Female	Other	No	19.5	34.5	31.4	49.5	62.7	83.8
Intervention	35	Male	Farming	No	17.8	26.3	29.8	59.9	59.2	82.7
Intervention	42	Female	Farming	Yes	18.3	25.5	26.3	58.1	71.5	56.3
Intervention	49	Female	Farming	Yes	26.5	24.5	29.3	48.7	47.8	64.9
Intervention	49	Male	Farming	Yes	20.7	26.4	37.2	66.8	44.6	70.5
Intervention	31	Male	Farming	Yes	24.4	34.2	32.9	67.1	80.8	51.7
Intervention	36	Male	Farming	Yes	18.6	29.9	27.6	50.8	53.5	50.2
Intervention	42	Female	Farming	Yes	18.7	34.4	20.5	53.2	68.7	66.6
Intervention	35	Female	Farming	Yes	17.1	25.8	32.2	40.4	67.9	68.9
Intervention	59	Male	Farming	Yes	27.5	25.9	32.9	47.4	53.2	61.2
Intervention	44	Female	Farming	Yes	24.7	28.3	26.9	47.5	74	51.6
Intervention	48	Male	Farming	Yes	17	31	26.4	37.9	83.6	71.3
Intervention	47	Female	Farming	Yes	26.2	29.3	21.1	60.7	61.1	61.1
Intervention	53	Male	Farming	Yes	20.3	32.5	34.2	47.6	62.9	64.5
Intervention	40	Female	Farming	Yes	23.3	31.4	27.4	40.2	64.6	50.8
Intervention	21	Male	Farming	Yes	21.6	31.7	30.2	35.8	74	68.4
Intervention	43	Male	Farming	Yes	15.4	32.5	24.6	66.6	68.2	64.3
Intervention	30	Female	Farming	Yes	17.9	34.1	23.2	37.5	61.4	58.5
Intervention	31	Male	Other	Yes	27.1	20.2	35.2	43.6	68.6	42.8
Intervention	46	Male	Farming	Yes	25.3	29.8	27.5	62.5	59.9	83.1
Intervention	54	Female	Pastoralism	Yes	17.1	33.1	26	38.7	66.8	53.6
Intervention	38	Male	Farming	Yes	22.3	39.6	40	47.5	75.8	87.2
Intervention	42	Female	Pastoralism	Yes	20.5	29.4	33.1	58.7	64.7	60.7
Intervention	60	Male	Farming	Yes	26.2	21.2	26.1	40.7	59.9	74
Intervention	41	Male	Farming	No	20.5	35.4	32.1	27	62.6	71.7
Intervention	72	Male	Other	Yes	18.2	25.1	22.5	49	54.4	49.6
Intervention	45	Female	Farming	No	24.5	31.6	27.8	18.7	56.3	82.8
Intervention	18	Male	Farming	Yes	26.4	31.9	25.7	28.9	65.1	61
Intervention	48	Female	Farming	Yes	23.1	30.3	30.8	56.6	59.4	73.6
Intervention	43	Female	Farming	No	23.8	21.5	35.9	46.6	67	37.9
Intervention	55	Male	Pastoralism	Yes	16.4	28.4	22.2	48.6	74.7	57.5
Intervention	47	Female	Farming	Yes	16	23.7	36.7	58.4	78.5	61.8
Intervention	36	Female	Farming	Yes	15.7	31.6	32.2	50.2	59.4	72.7
Intervention	22	Male	Farming	Yes	25.8	26.3	25	55.6	63.3	62.8
Intervention	35	Male	Farming	No	19.8	21.5	25.1	45.2	72.3	83.5
Intervention	27	Male	Farming	Yes	24.9	32.6	26.2	69.4	75.4	43
Intervention	31	Female	Farming	Yes	18.9	24.9	25.5	31.6	51.1	52.3
Intervention	46	Female	Farming	No	21.3	30.3	25.7	67.7	55.2	54.3
Intervention	60	Male	Farming	Yes	18	26.9	21.7	43.2	70.5	49.6
Intervention	43	Male	Farming	Yes	20	33.2	28.3	36.2	64.8	60.4
Intervention	23	Female	Farming	No	14.2	33	32.2	64.7	52.7	43
Intervention	44	Male	Other	Yes	20.1	30.7	26.7	41.9	59.7	47.5
Intervention	54	Female	Farming	Yes	19.7	29.4	30.3	40.3	74	40.5
Intervention	30	Male	Farming	Yes	14.3	28.1	33.7	18.8	76.5	71.8
Intervention	36	Female	Farming	Yes	23.2	25.1	23	50.9	69.5	53.6
Intervention	38	Female	Other	Yes	23.8	27.5	26.4	67.5	61.7	60.8
Intervention	28	Male	Farming	Yes	18.6	31.7	22.9	51.5	47.8	67.3
Intervention	46	Male	Farming	Yes	16.3	37.4	23.4	50.2	73.7	58.7
Intervention	37	Male	Pastoralism	Yes	28.7	32	34.7	63.9	77.7	40.4
Intervention	44	Male	Farming	Yes	22.5	32.6	27	48.9	59.7	71.2
Intervention	27	Male	Farming	Yes	11.4	29.4	31	42.8	78.6	59
Intervention	32	Female	Farming	Yes	19.6	31.9	29.8	35.8	53.8	84.5
Intervention	47	Male	Farming	Yes	18.7	21.4	32	45.1	71.7	63
Intervention	33	Male	Farming	Yes	18.4	27	29.7	42.7	61.8	65.1
Intervention	60	Female	Farming	Yes	26	32.5	29.5	58.5	57.5	57.3
Intervention	33	Female	Farming	Yes	22.5	32.6	23	47.8	54.4	64.7
Intervention	41	Male	Farming	Yes	24.1	27.7	29.2	56.3	64	74.4
Intervention	50	Female	Other	Yes	20.8	24.7	29.2	36.1	58.6	80.5
Intervention	20	Female	Farming	Yes	25	29.5	25.2	40.2	59.9	75
Intervention	18	Female	Farming	Yes	19.8	28.1	20.6	52.7	68.2	35.9
Intervention	18	Male	Other	Yes	22.4	33.5	30.1	30.7	78.5	56.4
Intervention	54	Male	Farming	Yes	23.4	32.5	34.1	38	78.6	51.2
Intervention	31	Female	Pastoralism	Yes	18.8	35.8	21.8	62.2	42.7	69.6
Intervention	71	Female	Farming	Yes	12.6	34.1	28.4	57.4	77.4	51.9
Intervention	31	Female	Pastoralism	Yes	14.3	28.7	19.9	30.8	50.6	63.9
Intervention	40	Male	Pastoralism	No	31.1	31.2	31.8	44.9	72.3	51.3
Intervention	58	Female	Farming	Yes	24.1	37.7	34	56.5	50	71.6
Intervention	64	Female	Farming	Yes	24.3	28.2	28.7	47.4	67.4	70.2
Intervention	65	Male	Farming	Yes	27.4	30.5	31.7	57.1	78.7	62.8
Intervention	54	Male	Farming	Yes	16.7	29.8	29.4	45.2	49.7	72.7
Intervention	51	Female	Other	Yes	18.4	29.9	25.1	65.3	69.6	75.7
Intervention	46	Female	Farming	Yes	16.8	26.4	28.5	38.4	64.4	63.6
Intervention	48	Male	Pastoralism	Yes	31.3	34.9	29	47.1	87	74.4
Intervention	31	Female	Pastoralism	Yes	17.2	26.2	28.5	45	56.9	80
Intervention	28	Female	Farming	No	26.7	37	30.6	54.7	68.8	68.2
Intervention	38	Female	Farming	Yes	18.6	36.2	29.6	79.6	81.9	61
Intervention	36	Female	Farming	Yes	21.8	30.8	28.3	22.5	54.4	74
Intervention	32	Female	Farming	Yes	26.7	29.8	26.5	66.1	72.6	70.7
Intervention	47	Male	Other	Yes	22.6	26.8	31.1	62.2	76	50.8
Intervention	50	Male	Farming	Yes	20.8	30.1	30.9	53.2	78.1	56.3
Intervention	39	Female	Farming	Yes	30.9	34	29.8	45.9	62.7	78.5
Intervention	57	Male	Pastoralism	Yes	13.7	27.1	25.7	39.5	56.4	65.4
Intervention	23	Female	Farming	Yes	17.4	35.5	24.5	59.1	65	68.3
Intervention	36	Female	Farming	Yes	20.1	33.8	31.9	56.5	75.2	61.1
Intervention	29	Male	Pastoralism	Yes	25.8	29.4	25.4	31.5	46.1	80.4
Intervention	18	Female	Farming	Yes	19.3	32.9	27.7	67.6	59.4	53.5
Intervention	37	Female	Pastoralism	Yes	25.5	26.2	22.7	47.7	54.1	73.6
Intervention	37	Male	Pastoralism	Yes	14.2	29.4	30.9	27.3	65.9	74.4
Intervention	58	Male	Farming	Yes	26.2	38.4	24	64.1	78.2	78.8
Intervention	46	Female	Farming	Yes	25.2	34.5	23.8	34.3	69.7	64.6
Intervention	25	Male	Farming	Yes	16.9	31.7	25	51.4	57.1	73.9
Intervention	62	Female	Farming	Yes	21.3	30.1	30.9	70.2	82.4	72.5
Intervention	54	Male	Farming	Yes	20.3	29.5	28.2	45.2	82.9	60.5
Intervention	46	Male	Farming	Yes	23.3	29.7	26.5	50.8	68.4	70.6
Intervention	35	Male	Other	No	26.3	26.8	35.9	37.6	59.9	66.4
Intervention	26	Female	Farming	No	18.5	32.3	31.2	68.2	58.9	80.6
Intervention	33	Male	Pastoralism	Yes	23	33.9	20.9	57.8	66.1	62
Intervention	52	Male	Farming	Yes	22.4	28.8	25.5	47.1	64.6	72.5
Intervention	62	Female	Farming	Yes	21.9	31.6	21	33.6	51.9	71.5
Intervention	58	Male	Other	Yes	27.5	27	27.1	49.7	63.7	53.5
Intervention	32	Male	Other	Yes	22.1	29.5	33.3	56.4	60	56.9
Intervention	24	Male	Farming	No	16.3	26.5	30.1	52.7	72.4	52.2
Intervention	40	Male	Farming	Yes	24.5	28.9	28.1	46.3	65.8	68
Intervention	18	Female	Farming	No	28.1	30.3	27.2	57	72.2	73.8
Intervention	42	Male	Farming	No	22	32.2	30.4	55.5	68.8	69.4
Intervention	36	Male	Pastoralism	Yes	27.1	27.4	22.2	58.1	50.1	73.7
Intervention	32	Female	Pastoralism	Yes	19.6	31.7	28.6	51.6	48.2	69
Intervention	18	Female	Farming	Yes	23.1	26.1	29.8	53.8	63.4	47.6
Intervention	45	Female	Farming	Yes	14.8	31	23.9	45	49	65.2
Intervention	31	Female	Farming	Yes	18.8	38.4	25.5	61.9	72.6	69
Intervention	23	Female	Pastoralism	Yes	22.1	28.4	37.2	30.7	63.5	75.4
Intervention	18	Female	Farming	Yes	24.2	24.6	31.3	47.4	74.3	68.7
Intervention	38	Female	Other	Yes	23.2	33.3	22.1	38.3	80.5	73.7
Intervention	61	Female	Pastoralism	No	26.8	30.9	26	52.1	51.4	70.3
Intervention	60	Female	Farming	Yes	15	31.6	29	60	65.8	65.9
Intervention	32	Male	Pastoralism	Yes	27.6	34.8	38.6	36.4	78.3	41.8
Intervention	30	Female	Farming	Yes	18.4	27	32.7	57	66.7	67.1
Intervention	44	Female	Farming	Yes	16.2	27.1	33.6	49.8	67.4	73.4
Intervention	25	Female	Farming	No	25.8	31.9	30.7	33.5	55.7	49.2
Intervention	42	Male	Other	Yes	16.7	33.9	25.1	55.4	62.5	52.3
Intervention	48	Male	Farming	No	27.3	30.7	35.6	61.1	70.5	72
Intervention	54	Male	Farming	Yes	12.2	29.5	32.6	45.9	75.9	75.3
Intervention	37	Male	Farming	Yes	18.2	31.1	34.3	49.8	56.5	46.9
Intervention	35	Male	Farming	Yes	25.1	32.7	36.1	43.7	71.5	62.7
Intervention	27	Male	Pastoralism	Yes	24.2	24.2	35.5	12.5	65.5	70.8
Intervention	27	Male	Pastoralism	Yes	10.3	25.9	29	47.2	69.7	59.1
Intervention	35	Male	Farming	No	18.6	29.5	30.2	46	56.8	65.6
Intervention	43	Female	Farming	Yes	14.2	32.5	29.9	40	69.7	38.7
Intervention	50	Female	Farming	Yes	22	38.3	32.9	25.5	74.6	75.4
Intervention	28	Male	Farming	Yes	21.6	29.4	30.5	44.3	69.6	55.6
Intervention	57	Female	Pastoralism	Yes	20.4	30.8	29.7	40.3	52.3	68.8
Intervention	35	Male	Farming	Yes	21	27.2	28.7	55.9	79.5	58.1
Intervention	38	Male	Pastoralism	Yes	16.8	32.4	28.5	51.6	59.4	38.7
Intervention	28	Female	Farming	Yes	18.3	25.5	30.3	20.1	62.6	43.6
Intervention	18	Female	Farming	Yes	25.9	29.8	34.4	33.9	68.2	61.9
Intervention	50	Female	Farming	Yes	19.3	26.1	25.2	49.8	68.9	65.3
Intervention	48	Male	Farming	Yes	19	21.6	29.4	52.3	81.5	69.1
Intervention	34	Female	Farming	Yes	26.2	40	30.5	37.8	42.8	59.8
Intervention	39	Male	Farming	No	16.4	32.9	35.9	59.3	71.5	43
Intervention	45	Male	Farming	Yes	27.6	33	27.3	56.6	74	47.6
Intervention	18	Male	Farming	Yes	28	33.3	25.9	45	67.1	56.2
Intervention	31	Female	Farming	Yes	17.1	35.4	35.3	41.6	62.7	61.4
Intervention	48	Male	Farming	Yes	25.3	30.4	31.2	35.8	52.2	70.6
Intervention	22	Male	Farming	Yes	12.3	33.2	27.4	52.7	68.6	60.7
Intervention	42	Female	Pastoralism	Yes	21.8	27.8	33.4	44.8	88.4	52.7
Intervention	21	Male	Farming	Yes	17.2	29.1	21.4	32.4	81.4	50.9
Intervention	44	Male	Farming	Yes	23.5	23.8	28.9	51.9	66.8	66.4
Intervention	38	Male	Farming	Yes	22.7	30.6	30.3	37.7	55.6	66.1
Intervention	18	Male	Farming	Yes	20.2	27.7	31.5	54.5	75.3	58.5
Intervention	53	Female	Farming	Yes	16.8	29.3	25.7	64.5	70.6	56.8
Intervention	29	Female	Farming	Yes	25.3	33	25.6	63	43.8	60.4
Intervention	28	Male	Pastoralism	Yes	21.3	31	35.4	44.9	50.2	83.8
Intervention	41	Male	Farming	No	18.4	33.8	29.2	44.7	91.1	52.9
Intervention	53	Female	Farming	Yes	19.2	27.5	29.8	48.8	53.2	44.6
Intervention	25	Male	Farming	Yes	21	31.3	26.1	46.7	64	58.4
Intervention	39	Female	Farming	Yes	21	27.3	25.3	69.8	74.5	66.7
Intervention	44	Male	Farming	Yes	22.7	29.1	26.8	51	65	55
Intervention	47	Male	Pastoralism	Yes	25.4	28.6	34	43.4	59.9	73.2
Intervention	40	Female	Farming	Yes	25.8	25.8	26.5	26.9	76.7	46.1
Intervention	33	Female	Other	No	20.4	28.2	28.1	34.6	71.5	60.2
Intervention	27	Male	Farming	Yes	23.2	32.1	35.7	40.9	70.6	62.1
Intervention	39	Male	Farming	No	20.6	26.2	37.9	59.2	54.9	65.8
Intervention	24	Male	Other	Yes	26.5	27.2	23.1	37.4	65.7	62.4
Intervention	18	Male	Pastoralism	No	20.8	34.7	20.4	38.8	78.8	59.5
Intervention	44	Female	Farming	Yes	21.9	35.3	26.2	53.2	66.1	53
Intervention	50	Female	Farming	No	21.3	33	25.1	29.1	64.8	64.1
Intervention	18	Male	Farming	Yes	23.3	36.5	31.1	51.7	62.7	47.4
Intervention	25	Male	Farming	Yes	24.1	35.1	29	48.1	74.1	46.6
Intervention	46	Female	Pastoralism	Yes	27.2	29.5	28.6	43.4	63.4	51.4
Intervention	65	Male	Farming	Yes	26.5	37.6	32.7	58.1	66.7	55.3
Intervention	38	Female	Farming	Yes	21.6	35.9	20.4	47.2	50.3	64.2
Intervention	29	Female	Farming	Yes	21.2	29.5	26.6	47.9	68.7	82.6
Intervention	36	Female	Farming	No	20.5	30.8	28.6	59.2	52.7	63.1
Intervention	56	Female	Farming	Yes	25.6	27.2	33.3	57.5	70.9	64.9
Intervention	30	Female	Farming	No	22.4	29.4	28.9	56.1	57.1	58.8
Intervention	28	Female	Farming	Yes	31.7	23.7	30.8	41.9	58.2	67.7
Intervention	32	Male	Farming	Yes	21.1	27.5	27.8	11.8	60	58.4
Intervention	26	Female	Farming	Yes	27.8	32.9	28.9	62.4	66.5	51.6
Intervention	40	Male	Other	Yes	27.8	25.8	27.9	69.8	70.8	55.8
Intervention	59	Male	Farming	No	27.7	28.6	28.2	29.6	82.7	57.6
Intervention	42	Male	Farming	No	20	32	29.4	68.9	74.3	76.6
Intervention	35	Female	Other	Yes	21	28.7	35	53.7	66.9	65.3
Intervention	34	Male	Pastoralism	Yes	20.7	34.3	30.8	29.1	73.9	77.6
Intervention	18	Female	Farming	Yes	27.6	34.5	28.3	46.6	55.1	59.4
Intervention	49	Female	Farming	Yes	19.5	27.4	31.3	44.3	67.2	68.4
Intervention	37	Male	Farming	Yes	19	28.1	29.8	43.6	87.2	65.8
Intervention	36	Female	Farming	Yes	24.3	30	31.5	54.4	51.9	49
Intervention	79	Female	Farming	Yes	15.8	27.2	27.5	46.1	74.7	68.4
Intervention	42	Female	Farming	Yes	24.6	36.2	31.1	40	68.3	57.4
Intervention	28	Male	Farming	Yes	16.6	28.2	31.2	69.1	54.5	69.2
Intervention	33	Female	Pastoralism	Yes	19.7	33.4	23.3	54.2	62.9	83.1
Intervention	53	Female	Farming	Yes	26.3	24	27.5	39.7	77.5	57
Intervention	40	Male	Other	No	19.1	26.8	28.4	66.1	85.9	59.2
Intervention	20	Male	Pastoralism	No	22.7	25.6	27.8	43.4	75.5	70.3
Intervention	50	Male	Pastoralism	Yes	26.5	24.9	24.9	52.3	69.5	67.2
Intervention	29	Female	Farming	Yes	16.6	27.8	19	63.3	59.9	51.1
Intervention	62	Male	Farming	Yes	22.1	31.2	33.3	52.2	68.2	81.6
Intervention	52	Male	Farming	Yes	24.1	35.8	20.2	63.8	66.2	49.2
Intervention	32	Female	Farming	Yes	15.4	29	37.2	67.5	61.1	62.9
Intervention	55	Male	Farming	Yes	17	30.1	28.1	48.7	43	77.2
Intervention	39	Female	Pastoralism	Yes	28.2	31.1	26.4	70.3	56.7	57.8
Intervention	49	Male	Farming	Yes	16.6	27	22.7	33.1	58.5	73.6
Intervention	44	Male	Farming	Yes	19.9	29.7	22.3	55.7	65.8	54.5
Intervention	27	Male	Pastoralism	Yes	12.9	37.9	25.4	46.3	58.9	61.6
Intervention	30	Female	Farming	Yes	18.1	31.3	29.9	56.8	79.4	55.3
Intervention	51	Female	Farming	Yes	24.7	37.9	34.9	53	75.7	75.1
Intervention	34	Female	Farming	Yes	25.4	29.9	22.7	60.5	54.9	68.1
Intervention	33	Female	Farming	Yes	24.7	27.4	30.6	49.1	62	58
Intervention	26	Male	Farming	No	21.3	33.9	21.5	67.5	61.4	58.6
Intervention	44	Male	Farming	No	16.9	34.7	25.4	52.2	66.1	75
Intervention	65	Male	Farming	Yes	23.1	27.9	31.2	44.1	72.8	72.4
Intervention	24	Female	Pastoralism	Yes	19.5	31.2	24.9	50.8	63.1	48.9
Intervention	38	Female	Farming	Yes	14.6	29.6	35.4	41.1	60.4	64.1
Intervention	56	Male	Other	No	21.5	24.4	32.2	33.8	78.9	41.6
Intervention	37	Female	Farming	Yes	26.7	24.6	31.1	45.2	52.2	77.8
Intervention	44	Female	Pastoralism	Yes	26.1	29	26.8	63.5	82.4	80.9
Intervention	24	Male	Farming	Yes	26.3	34.3	25.5	50.1	73.8	52.2
Intervention	44	Female	Other	Yes	22.7	33.1	27.2	56.3	68.7	79.5
Intervention	36	Male	Farming	Yes	17.5	26.2	30.1	56.2	54	49.2
Intervention	51	Female	Farming	Yes	23.9	25.4	30.1	29.7	84.3	64.8
Intervention	53	Male	Farming	Yes	22	26.4	25.7	52.2	80.4	66.6
Intervention	72	Male	Farming	Yes	20.3	26.1	26.1	42.1	54.8	49.1
Intervention	46	Male	Farming	Yes	24.2	26.4	22.8	50.6	73.8	58.2
Intervention	42	Female	Pastoralism	Yes	23.3	21.9	38.4	55.5	60.7	67.7
Intervention	41	Female	Farming	No	18.8	20.3	25.4	38.3	67.3	40.7
Intervention	34	Male	Pastoralism	Yes	18.6	19.8	22.2	54.2	77.3	84.9
Intervention	42	Female	Pastoralism	No	16.6	23.8	18.9	37.1	70.5	63.9
Intervention	34	Female	Other	Yes	22.5	34.3	26.3	72.1	80.7	47.5
Intervention	40	Female	Farming	Yes	25.2	40	30.8	38.5	81	50.6
Intervention	55	Male	Farming	Yes	18.9	37.7	28.7	61.2	86.8	74.8
Intervention	25	Male	Farming	Yes	16.9	30.8	28.3	41.3	53.9	71
Intervention	53	Female	Farming	Yes	23.5	26.8	32.1	51	87.1	68.3
Intervention	55	Male	Farming	Yes	28	28.1	31.5	58.7	49	54.5
Intervention	37	Male	Farming	Yes	29.8	30.3	25.4	28.5	76.2	63.9
Intervention	18	Male	Farming	Yes	27.8	37.9	30.2	70.9	59.8	63.6
Intervention	30	Male	Farming	Yes	21.2	25.9	29.4	67.8	84	65.9
Intervention	55	Male	Farming	Yes	17.6	29.8	26.7	76.6	76.9	77.5
Intervention	38	Female	Farming	No	24	30.2	35	39	68.4	78.1
Intervention	25	Male	Farming	Yes	21.1	29.5	25.9	43.2	66	52.6
Intervention	32	Male	Farming	Yes	20.6	22	26.7	27.3	76.1	59.1
Intervention	49	Female	Farming	Yes	29.4	28.7	27.1	43.1	65.9	73.2
Intervention	45	Female	Pastoralism	Yes	27.2	24.5	32.9	36.2	87.7	67.2
Intervention	35	Female	Other	Yes	24.1	38.7	33.6	57.8	60.6	100
Intervention	33	Female	Pastoralism	Yes	21	32	34.6	71.4	69.8	69.6
Intervention	33	Male	Farming	Yes	21.4	34.2	32.3	28.2	78.3	71.1
Intervention	26	Male	Farming	Yes	14.9	26.3	28.7	66	54	72.5
Intervention	59	Female	Other	Yes	25.8	28	33	40.7	73.2	56.7
Intervention	34	Female	Pastoralism	No	26.8	37.8	30.6	50	71.8	64.1
Intervention	54	Female	Pastoralism	Yes	18.2	33.8	28.6	55.6	68.1	54.6
Intervention	58	Male	Farming	Yes	18.8	31.4	27.2	65.5	43.5	96.7
Intervention	51	Male	Farming	Yes	25.5	35	28.4	59.4	70.8	42.2
Intervention	33	Male	Pastoralism	Yes	20	37.4	27.1	52.4	49.8	62
Intervention	43	Female	Farming	Yes	26.2	35.7	30.8	47.2	81.1	87.2
Intervention	38	Male	Farming	Yes	18.1	33.9	28.2	63.4	43.3	53.1
Intervention	26	Male	Farming	Yes	20.1	34.3	31.1	31.8	83.2	83.7
Intervention	42	Male	Farming	Yes	23.6	28.5	31.2	41.2	56.2	53
Intervention	23	Male	Farming	Yes	20	30.6	29.1	47.1	55.2	48.9
Intervention	53	Male	Farming	Yes	19.8	32.5	27.2	45.9	59.4	81.8
Intervention	32	Male	Farming	Yes	19.7	31	25.4	47.4	57.8	58.7
Intervention	41	Female	Farming	Yes	24.3	31.8	28.7	64.4	74.6	55
Intervention	42	Male	Farming	Yes	25.4	29.2	30.3	48.6	60	48.3
Intervention	35	Female	Farming	Yes	23.5	19.2	23.5	41	67.7	84.5
Intervention	46	Male	Pastoralism	No	18.5	32.4	21.8	59.2	58.4	78.2
Intervention	32	Male	Farming	Yes	27.1	30.2	28.6	58.3	73.6	57.1
Intervention	49	Female	Farming	Yes	22.5	30.3	25.4	53.9	83.3	71.8
Intervention	21	Male	Farming	Yes	25.8	38.4	33.2	57.2	55	58.8
Intervention	40	Female	Farming	Yes	16	31.2	34.5	48.1	63.3	52.6
Intervention	63	Female	Farming	Yes	26.3	26.7	25	47.2	62.5	71
Intervention	25	Female	Farming	Yes	19.8	32.5	22.1	41.7	48.7	59.5
Intervention	29	Male	Farming	Yes	19.5	30.1	31.5	24.1	56.3	62.4
Intervention	45	Male	Farming	No	23.1	34.2	29.9	37.1	51.5	75.8
Intervention	40	Female	Farming	Yes	12.8	27.5	30.7	68.9	67.4	63.9
Intervention	43	Male	Farming	Yes	22.9	26.6	32.2	56.4	73.5	51.9
Intervention	44	Male	Other	Yes	20.2	27.7	27.4	48.1	47.3	65.4
Intervention	46	Female	Farming	Yes	27.3	23.1	28.3	51.6	63.4	38.1
Intervention	52	Male	Other	Yes	22.5	28.1	32.4	33.8	65.9	63.8
Intervention	43	Male	Other	Yes	17.2	36	30.9	65.6	71.1	65.5
Intervention	35	Female	Pastoralism	Yes	18	27	37.5	66.3	69.7	52.2
Intervention	47	Female	Pastoralism	No	11.1	24.5	30.3	41.9	75.8	71.8
Intervention	63	Female	Farming	No	31.6	27.7	30.2	52.9	68.8	55.9
Intervention	36	Male	Farming	Yes	10.9	30.7	32.7	38.6	55.1	62.4
Intervention	26	Male	Other	Yes	19.1	26.9	37.6	54.4	64.7	59.7
Intervention	52	Male	Farming	Yes	24.5	30.1	32	58.4	72.4	77.1
Intervention	37	Male	Farming	Yes	27.6	30.8	27.9	46.7	58.3	46.6
Intervention	18	Female	Farming	Yes	29	29.8	26.4	54.3	71.8	61.7
Intervention	49	Male	Farming	Yes	21	29.5	29.8	38.3	62.7	55.3
Intervention	31	Male	Farming	Yes	23.5	36.7	24.6	64.5	65.8	83.7
Intervention	37	Female	Farming	Yes	20.1	30.5	31.7	58.4	59.3	62.6
Intervention	42	Female	Pastoralism	Yes	14.9	26.7	30.3	31	71.9	49.8
Intervention	41	Female	Farming	Yes	17	32.7	31.2	50.9	61.5	57.7
Intervention	47	Female	Farming	Yes	14.2	29.6	21.8	61.6	61.9	76.7
Intervention	32	Female	Farming	Yes	22.7	30.1	34.6	47.8	59	68.3
Intervention	45	Male	Farming	Yes	20	33.8	24.5	50.7	74.3	54.3
Intervention	35	Female	Farming	Yes	20.6	35	23.9	46.6	73.1	56.7
Intervention	48	Male	Farming	Yes	24.2	25.4	20.8	35.3	66.2	75.7
Intervention	46	Male	Pastoralism	Yes	22.4	36.6	26.6	59.2	68.8	45.4
Intervention	26	Female	Pastoralism	Yes	24.2	29.5	29.7	47.8	67.2	70.9
Intervention	52	Male	Farming	No	29	29.6	28.7	52.8	53.6	64.8
Intervention	31	Male	Pastoralism	Yes	18.1	25.9	32	55	61.6	51.9
Intervention	49	Male	Farming	Yes	13.5	32.7	34.3	36.7	73.6	67.7
Intervention	43	Male	Farming	Yes	19	24.3	34.7	39.4	57.2	53
Intervention	62	Female	Pastoralism	Yes	20.5	31.9	28.1	47.9	63	44.6
Intervention	35	Female	Farming	Yes	23.2	36.2	28.5	65.7	71.6	60.2
Intervention	34	Female	Farming	No	24.4	28.6	28.5	37.5	48.7	59.6
Intervention	38	Male	Farming	Yes	16.9	34	27.4	55.7	77.1	81
Intervention	34	Female	Farming	Yes	16.3	30.1	37.4	46	79.3	50.4
Intervention	48	Female	Farming	Yes	27.1	24.4	30.4	40.3	64.3	41.4
Intervention	18	Female	Farming	Yes	22.7	30.3	31.2	41.7	64.6	46.2
Intervention	25	Female	Farming	Yes	22.9	29.1	31.9	56.2	56.2	62.9
Intervention	24	Female	Farming	Yes	22.5	33.3	34.1	51.2	72.5	51.8
Intervention	50	Female	Farming	Yes	22	28.4	28.2	39.1	61.3	48.4
Intervention	60	Female	Pastoralism	Yes	20.5	31.7	31.2	48.9	62.7	59.8
Intervention	37	Female	Pastoralism	Yes	18.4	25.7	31.5	37.5	70.2	57.1
Intervention	36	Male	Farming	Yes	19.1	31.5	22.7	70.2	56.8	72.6
Intervention	39	Female	Farming	Yes	30.5	29.9	27.1	38.3	51.3	72.6
Intervention	53	Female	Farming	Yes	29	29.3	28.4	46.4	71.6	57.8
Intervention	26	Female	Farming	Yes	25.3	29.9	33.2	39.9	68.5	61.3
Intervention	41	Female	Farming	Yes	21.1	28.7	40	52.2	46.1	87.5
Intervention	51	Male	Farming	Yes	23.8	30.4	27.3	63.8	43.8	93.4
Intervention	45	Male	Pastoralism	No	15.4	29	27.1	47.6	57	93.4
Intervention	41	Male	Farming	Yes	25.6	26	30.9	38.6	85.5	65.1
Intervention	51	Female	Farming	Yes	20.4	24.7	22	56.5	50.1	59.5
Intervention	18	Male	Farming	Yes	21.5	27.9	21.8	49.4	68.8	48.1
Intervention	47	Male	Pastoralism	Yes	21.8	28.6	28.5	49.3	64	74.8
Intervention	30	Female	Farming	No	20.6	18.1	26.9	30.4	48	67.9
Intervention	18	Female	Pastoralism	Yes	24.8	29.9	33.7	61.7	43.4	55.9
Intervention	45	Female	Farming	Yes	28.1	38.4	27.6	68.2	56.7	67.3
Intervention	56	Female	Other	Yes	25	32.5	23.7	43.2	65.8	56.8
Intervention	36	Female	Farming	Yes	21.7	29.1	24.9	45.8	91.6	54.2
Intervention	50	Female	Farming	Yes	16.9	26.6	34	52.2	90.9	68.5
Intervention	59	Female	Pastoralism	No	21.6	23.2	26.1	54.9	70.1	81.2
Intervention	55	Male	Farming	Yes	21.1	33.3	27.7	39.8	69.6	79.8
Intervention	59	Male	Farming	Yes	24.9	31.5	27.9	53.5	66.2	38.7
Intervention	48	Female	Other	Yes	18.7	25	26.7	54.9	55.8	68.2
Intervention	39	Female	Farming	Yes	17.7	33.6	30.4	52.6	57.9	63.6
Intervention	18	Female	Farming	Yes	22.7	33.1	36.4	42.1	53.2	63.4
Intervention	35	Male	Farming	No	25.3	27.2	31.4	73.1	56	63.7
Intervention	27	Male	Farming	Yes	22	28.7	32.5	34.4	69.5	59.9
Intervention	66	Female	Farming	Yes	25.5	30.8	25.1	46.2	56.7	35.3
Intervention	36	Male	Farming	Yes	16	32	30.6	47.9	55.9	69.9
Intervention	40	Male	Farming	Yes	23.4	25.5	34.7	35	62	72.7
Intervention	45	Male	Farming	Yes	16	32	28.1	56.6	52.9	69
Intervention	39	Female	Farming	Yes	32.6	30	29.1	53.6	56.9	61.2
Intervention	60	Female	Farming	Yes	27	34.1	32.2	67.8	55.3	46.7
Intervention	30	Female	Farming	No	23	32.8	35.4	40.7	58.4	65
Intervention	41	Female	Farming	Yes	14.7	30	34	54.5	93.7	60.4
Intervention	29	Female	Farming	Yes	15.6	33.4	23.9	48.7	66.1	90.1
Intervention	21	Female	Farming	Yes	29.4	23.9	30.5	43.1	74.9	57.3
Intervention	30	Female	Pastoralism	No	16.5	28.3	26.6	66.5	64.8	80.8
Intervention	38	Male	Pastoralism	Yes	23.5	26	27.8	43.8	49.7	61
Intervention	33	Male	Farming	Yes	29.1	27.6	23.8	61.7	72.8	47.5
Intervention	29	Female	Farming	Yes	21.8	27.6	28	40.7	61.9	60.1
Intervention	20	Male	Farming	Yes	16.4	24.9	25.6	66.1	61.4	63.4
Intervention	37	Female	Farming	Yes	13.9	33.5	28.4	46.4	66.7	58.2
Intervention	19	Female	Pastoralism	Yes	23	32.7	31.1	36.4	68.1	59.9
Intervention	48	Female	Farming	Yes	16.8	27.4	30.3	71.5	80.7	66.7
Intervention	39	Female	Farming	Yes	21.4	20.8	32.7	54.1	64.1	62.5
Intervention	19	Male	Farming	Yes	16.9	27.8	27.1	60	52.1	71.7
Intervention	34	Male	Other	Yes	18.9	29.6	22.2	36.9	65.4	71.8
Intervention	28	Female	Pastoralism	Yes	19	35.1	35.6	46	77.7	59.7
Intervention	42	Male	Farming	Yes	20.3	27.6	31.3	41.7	68	48.8
Intervention	55	Male	Other	Yes	18.3	33.6	31.5	46.3	65.1	64
Intervention	18	Female	Farming	Yes	22.6	27.8	31.3	40.1	49.2	70.4
Intervention	40	Female	Pastoralism	Yes	25.6	32	30.2	48	76	56
Intervention	36	Female	Farming	Yes	19.9	32.9	33.2	40.3	83.7	57.5
Intervention	47	Female	Pastoralism	Yes	22.5	32.1	26.4	63.3	68.7	68.8
Intervention	41	Male	Farming	Yes	17.5	26.1	32.3	29.4	69.1	77.1
Intervention	28	Female	Farming	Yes	14.8	28.4	30.6	58.9	69.8	92.8
Intervention	34	Male	Farming	Yes	23.1	32.1	29.6	48	67.7	68.4
Intervention	28	Male	Farming	Yes	25.1	23.6	27.1	60.8	53.2	65.1
Intervention	52	Male	Farming	Yes	13.4	32.9	30.1	57.8	55.9	55.8
Intervention	38	Female	Farming	Yes	21	25.1	28.2	63.1	66.5	88
Intervention	63	Female	Farming	Yes	23.2	24.5	32.6	50.2	49.3	88
Intervention	37	Female	Farming	Yes	22.6	27.7	27.2	71.3	76	66.9
Intervention	29	Female	Farming	Yes	18.9	27.1	24.9	20.6	51.9	52.5
Intervention	19	Male	Farming	Yes	21.6	30.5	31.4	50	81.4	40.6
Intervention	18	Male	Pastoralism	Yes	25.3	30.8	37.7	63.9	69.5	61.7
Intervention	18	Female	Farming	Yes	17.8	30.1	30.2	39.7	53.8	52.5
Intervention	42	Female	Pastoralism	Yes	27.9	26	28.5	50.5	47.5	82.1
Intervention	45	Female	Pastoralism	Yes	15.6	34.5	36.4	16.7	76.8	58.7
Intervention	18	Male	Pastoralism	Yes	25.2	30.1	31	29.4	63.3	71.9
Intervention	50	Female	Farming	No	21.6	33.4	28.5	38.6	54.1	70.1
Intervention	32	Male	Farming	Yes	19.2	20.9	36.1	58.9	92.3	42.8
Intervention	40	Female	Pastoralism	Yes	13.7	31.9	26.1	49.6	71.8	63.7
Intervention	59	Male	Farming	Yes	26.4	27.6	27.7	39.7	67.6	67.8
Intervention	50	Female	Other	No	17.5	32.8	30.5	44.5	54.8	73.9
Intervention	35	Male	Pastoralism	No	21.3	36.8	40	63.2	73.5	37.3
Intervention	27	Female	Farming	Yes	23.4	25.2	25.3	48.3	66	92.2
Intervention	18	Male	Farming	Yes	31.4	33.1	24.5	54.1	62.2	56.9
Intervention	29	Male	Farming	Yes	19.9	27.5	30	69.4	75.2	42.7
Intervention	35	Female	Pastoralism	Yes	21.6	22.5	35.2	22.3	59.1	63.9
Intervention	25	Male	Pastoralism	Yes	23.1	33.4	32.8	31.3	61.1	62.3
Intervention	36	Female	Farming	Yes	21.9	36.9	26.3	45.9	75.7	58.4
Intervention	39	Male	Pastoralism	Yes	18.2	38	24.4	69.7	70.9	63
Intervention	35	Female	Farming	Yes	27.6	31	26.4	44.7	60.1	80.3
Intervention	30	Male	Farming	Yes	19.5	24.2	29.5	49.5	89	50.3
Intervention	40	Male	Farming	Yes	23.4	29	30.4	47.4	75	85.2
Intervention	44	Female	Farming	Yes	20.5	29.4	28.1	56.7	55.2	75.3
Intervention	24	Male	Farming	Yes	18.9	34.1	28	51	59	71.9
Intervention	56	Male	Farming	Yes	25.8	29.7	28	57	60.3	53.5
Intervention	37	Female	Farming	Yes	22.5	21.7	31.6	35.2	69.7	67.9
Intervention	38	Male	Other	Yes	12.2	32.3	30.5	55.2	76.5	85.5
Intervention	47	Male	Farming	Yes	22.7	30.1	31.7	41.9	80.9	71.4
Intervention	41	Female	Farming	Yes	18.8	33.3	30.5	48.8	46.3	49
Intervention	50	Female	Farming	No	14.7	30.8	21.4	45.9	67.3	45.1
Intervention	42	Male	Pastoralism	Yes	25.4	32.5	29.1	60.4	64.7	44.8
Intervention	30	Female	Farming	Yes	18.2	29.9	26.4	34.2	74.5	78.7
Intervention	43	Female	Pastoralism	Yes	22.5	30.9	35.6	47.7	74.5	50.9
Intervention	23	Male	Farming	Yes	25.3	26.2	24.4	53.1	76.1	64.9
Intervention	40	Male	Farming	Yes	20.4	31.2	21.3	59.2	63.8	75.1
Intervention	38	Male	Farming	Yes	22.5	29.1	32.3	49.9	82	67.2
Intervention	35	Female	Farming	Yes	18.5	31.7	30.1	42	57.6	42.7
Intervention	36	Male	Farming	Yes	26	25.2	29.7	47.8	82.9	55.7
Intervention	18	Female	Farming	Yes	20.6	35.3	30.8	35.4	77.3	66.6
Intervention	31	Female	Farming	Yes	23.7	30.8	28.7	51.2	54.5	59.8
Intervention	39	Male	Pastoralism	Yes	27.7	32.9	27.2	70.7	46.5	80
Intervention	40	Female	Farming	Yes	13.6	29.8	29.8	37.1	62.7	59.3
Intervention	25	Female	Farming	Yes	18.5	32.2	24.7	47.5	47.7	69.4
Intervention	54	Male	Farming	Yes	20.7	21	35.2	38.8	54.7	69.3
Intervention	27	Male	Pastoralism	Yes	21.9	29.4	26.4	48.6	61.1	60.7
Intervention	51	Female	Farming	Yes	24	26.7	24.1	33.3	48	62.8
Intervention	44	Male	Farming	Yes	26.5	28.4	30.7	56.3	42	60.1
Intervention	30	Male	Farming	Yes	18.3	33.7	25.7	58.9	67.3	85.1
Intervention	61	Male	Farming	Yes	20.6	23.6	34	10.7	82.8	75.7
Intervention	23	Male	Farming	No	26.1	32.7	20.9	75.5	76.5	89.4
Intervention	50	Male	Farming	Yes	22.8	31.6	22.3	49	33.5	61.8
Intervention	51	Female	Pastoralism	Yes	14.3	34.8	27.6	56.2	59.6	42.3
Intervention	29	Female	Pastoralism	Yes	13.9	21.7	29.6	39	65.1	37.8
Intervention	56	Male	Farming	Yes	19.3	32.1	26.1	52	78.2	47.9
Intervention	35	Male	Farming	Yes	23.7	30.8	28	45.7	66.8	69.5
Intervention	42	Male	Farming	Yes	23.6	29.6	36.2	51.4	66.1	72.6
Intervention	41	Male	Farming	Yes	17.6	35.4	26.2	40.6	68.4	72.2
Intervention	36	Male	Pastoralism	Yes	24.2	21.6	22.5	62.5	40.6	94.6
Intervention	49	Male	Farming	Yes	22.5	30.3	28.1	32.9	56.4	48.8
Intervention	48	Female	Pastoralism	Yes	16.9	33.8	24.5	59.3	70.3	61.6
Intervention	18	Male	Farming	Yes	18.9	23.5	31.5	51.8	67.9	74.5
Intervention	55	Male	Farming	Yes	13.2	32.1	31.1	45.9	46.1	63.4
Intervention	18	Male	Other	Yes	16.4	31.1	28.6	45.8	60.3	47.9
Intervention	51	Male	Farming	No	13.5	21.5	30.6	39	70.3	72.7
Intervention	53	Female	Farming	Yes	14.9	34.1	24.7	35.7	59.7	60.4
Intervention	24	Male	Farming	Yes	28.5	26.3	33	50.1	65.1	60.4
Intervention	33	Female	Farming	Yes	19.7	36	26.8	70.7	45	56.7
Intervention	24	Male	Farming	Yes	13.9	32	36	26.3	70.8	55
Intervention	35	Female	Pastoralism	Yes	23.2	31	27.8	51.9	69.7	71.7
Intervention	34	Female	Other	Yes	22.6	33.7	27.3	45.2	59.2	77.4
Intervention	48	Male	Pastoralism	Yes	22.2	33.3	28.3	68.5	65	89.2
Intervention	55	Male	Farming	Yes	17.7	22.2	31.5	29	56.2	56.7
Intervention	56	Female	Other	Yes	24	23.2	35	46	52	67.2
Intervention	31	Male	Pastoralism	Yes	16.8	29.2	30.6	51.7	67.5	73.9
Intervention	35	Female	Farming	Yes	24.7	25.6	37.9	26.2	54.5	80.7
Intervention	18	Male	Farming	Yes	25.1	36.3	25.7	74	68.1	52.7
Intervention	28	Male	Farming	Yes	21.1	25.9	28.3	56.6	93.1	61.1
Intervention	51	Male	Farming	No	15.2	30.2	24.6	55.4	65.1	63.1
Intervention	59	Female	Farming	Yes	24.8	32.1	27	61.9	68.6	55.3
Intervention	22	Male	Farming	Yes	18.9	39.3	26.4	35.3	65.5	57.1
Intervention	30	Male	Other	Yes	22.6	34.3	23.1	57.1	44.2	50.1
Intervention	38	Female	Farming	Yes	24.3	27.2	32.9	44	58.6	76.9
Intervention	42	Male	Farming	Yes	18	31.8	31.5	30.4	38.9	60.4
Intervention	28	Male	Other	Yes	30.4	32.5	27.5	59.9	72.6	56.7
Intervention	44	Male	Farming	Yes	21.2	32.2	30.4	18.1	56.6	51.5
Intervention	32	Female	Other	Yes	18.6	26	27.4	54.4	61.1	67
Intervention	38	Female	Pastoralism	Yes	25.6	37.7	28.2	51.8	61.5	83
Intervention	45	Male	Farming	Yes	27.9	25	31.2	75.1	63.9	61.5
Intervention	38	Male	Farming	No	12.7	32.5	29	34.7	79.1	64.9
Intervention	32	Female	Farming	No	15.6	26.4	29.2	46.6	48.7	67.6
Intervention	37	Female	Farming	Yes	18.1	31.3	21.3	48.3	61.9	63.1
Intervention	37	Male	Farming	Yes	30.3	29	32.5	54.9	43.8	44.5
Intervention	33	Male	Farming	Yes	19.4	24.7	34.4	57.4	72.8	60.8
Intervention	35	Male	Pastoralism	Yes	27.8	20.1	33.3	46.9	48.1	57.5
Intervention	59	Female	Farming	Yes	22.3	33.3	26.9	53.4	72.3	70.5
Intervention	45	Female	Farming	Yes	15.3	27.6	33.1	55.2	67.6	68.2
Intervention	34	Male	Other	Yes	25.1	30.3	30.9	58	58.1	61.6
Intervention	47	Male	Farming	Yes	22.7	36.8	25.6	51.8	77.6	68.3
Intervention	34	Male	Other	Yes	17.8	32.2	27.9	44.7	77.4	62.6
Intervention	53	Male	Farming	Yes	18.6	18.5	28.7	77.6	62.4	51
Intervention	43	Male	Farming	Yes	17	25	19.5	40.6	64.4	56.3
Intervention	37	Female	Farming	No	18.8	22.6	29.9	39.1	52.1	66.6
Intervention	44	Male	Other	Yes	24.2	26.5	24.5	48.6	80.5	55.8
Intervention	18	Female	Farming	Yes	17.6	28.7	24.8	44.7	65.1	79.3
Intervention	24	Male	Farming	Yes	21.8	39.8	29.7	80.1	83.4	58.5
Intervention	23	Female	Farming	Yes	22.7	33.7	27.7	36.3	81.4	51.4
Intervention	40	Male	Farming	No	21.2	31.2	25	42.1	63.7	83.8
Intervention	60	Male	Farming	Yes	14.6	31.5	29.7	49.4	48.5	67.7
Intervention	67	Female	Farming	Yes	24.5	31.7	25.6	66.5	66.5	84
Intervention	46	Male	Other	Yes	16.5	23	25.6	34.1	57	67.9
Intervention	45	Female	Farming	Yes	19	24.3	33.9	60.7	63.8	55.5
Intervention	18	Female	Farming	No	19.5	31.6	29.8	59.3	74.8	62.8
Intervention	31	Male	Pastoralism	No	21.3	29.8	30.5	53.3	82.3	57.9
Intervention	28	Female	Farming	Yes	21.8	31	35.5	39.6	60.7	76.9
Intervention	30	Female	Other	Yes	24.3	36.1	28.1	39.5	94.7	65.3
Intervention	36	Female	Farming	Yes	20.1	27.1	26.5	45.7	54.1	98
Intervention	32	Female	Farming	Yes	16.3	28.4	26.6	53.5	60.1	66.3
Intervention	18	Male	Farming	Yes	26	30.8	36.7	60.2	78.6	94.1
Intervention	48	Female	Other	Yes	19.7	23.2	28.7	43.7	55.1	58.4
Intervention	24	Female	Other	Yes	20.6	24.1	25.3	34.8	77.8	52.9
Intervention	41	Female	Pastoralism	Yes	17.2	35.1	29.6	38.9	68	68.3
Intervention	65	Female	Farming	Yes	17.8	28.7	26.5	44.6	60.9	58
Intervention	26	Male	Other	Yes	27.5	27.9	27.4	55.5	79.8	78.2
Intervention	18	Male	Other	Yes	15.6	30.7	35.8	38.8	57.1	69.7
Intervention	34	Female	Farming	Yes	16.2	23.3	29.6	36.2	69.5	54
Intervention	52	Female	Farming	Yes	19.5	28.6	23.9	45.8	83.5	64.4
Intervention	63	Male	Other	Yes	22.7	27.6	27.3	51.4	47.6	83.3
Intervention	22	Female	Farming	Yes	17.3	31.2	21.5	53.3	64.8	74.9
Intervention	45	Female	Farming	Yes	14.8	21.6	26	43.7	84.5	47.3
Intervention	32	Female	Pastoralism	Yes	16.3	26.7	33.2	48.4	64.5	83.5
Intervention	37	Female	Farming	Yes	19.7	28	26.1	32.6	54.3	76.3
Intervention	72	Female	Other	Yes	17.2	27.9	39.9	44.7	87.5	70.1
Intervention	19	Female	Farming	Yes	30.7	33.9	18.4	48.2	75.5	79.9
Intervention	41	Female	Farming	Yes	29.7	26.7	27.3	67.7	67.1	66.6
Intervention	44	Male	Farming	Yes	26.3	40	29.6	60.6	67.5	56.5
Intervention	52	Male	Farming	Yes	23	32.7	29.3	52.5	55.3	80.9
Intervention	39	Male	Farming	Yes	23	27.9	31.4	32	69.9	50.1
Intervention	42	Male	Farming	Yes	27	32.2	28	53.6	86.2	54.8
Intervention	33	Male	Farming	Yes	21.9	32.6	34.2	40.5	60.4	85.9
Intervention	42	Female	Farming	Yes	17.9	28.6	24.1	19.4	69.6	54.1
Intervention	34	Female	Other	No	30.3	34.3	28.1	59.9	76.7	68.7
Intervention	46	Male	Farming	Yes	23.8	26	24.5	56.1	65.7	67
Intervention	33	Female	Farming	Yes	27.5	32.1	27.1	39.1	56.3	48.2
Intervention	43	Male	Farming	Yes	29	29.4	28	54.6	60.4	58.1
Intervention	38	Male	Farming	No	14	30.9	31.6	48.5	62.3	48.6
Intervention	53	Female	Farming	Yes	17.8	30.7	24.9	42	58.6	65.1
Intervention	37	Male	Pastoralism	Yes	20.5	29.9	28	54.8	72.4	56.1
Intervention	18	Female	Pastoralism	Yes	23.5	37.5	29.2	62.4	39.1	74.1
Intervention	54	Male	Farming	Yes	25.2	27.5	29.7	42.8	71.5	87.9
Intervention	26	Male	Other	Yes	21.1	26.7	24.5	37.9	57.8	59.2
Intervention	30	Female	Pastoralism	Yes	26.8	29.5	30.1	62.8	57.5	73.6
Intervention	30	Male	Farming	Yes	24	34.9	33.9	67.9	61.2	19.6
Intervention	56	Female	Farming	Yes	23.9	29.9	33.8	69.1	46.2	70.3
Intervention	18	Male	Other	Yes	20.2	29.5	28	58.9	60.3	77.7
Intervention	79	Female	Other	Yes	22.7	27.6	31.2	36.2	61.3	59
Intervention	52	Female	Farming	Yes	22.7	27.9	28.4	32.1	73.7	40.5
Intervention	41	Female	Farming	Yes	25.4	34	33.5	63.4	62.8	70
Intervention	37	Male	Farming	Yes	15.9	29.6	31.9	53.5	53.1	67.5
Intervention	42	Male	Farming	Yes	24.3	30.8	24.3	56.2	65.6	71.2
Intervention	45	Female	Pastoralism	No	14.5	27.1	28.5	30.8	68	65.3
Intervention	46	Male	Other	Yes	17.8	32.8	26.4	55.1	60	66.5
Intervention	45	Male	Farming	Yes	24	34.6	28.7	60.1	78.5	49.3
Intervention	39	Female	Farming	Yes	17.9	26.2	24.4	31.9	53.9	71.8
Intervention	36	Female	Pastoralism	Yes	21.5	26.3	28.6	56.4	65.7	82.9
Intervention	36	Male	Farming	Yes	17.5	26.5	28.5	38.8	70.7	49.9
Intervention	36	Male	Farming	Yes	23.9	33.8	28.6	41.3	75.7	62.3
Intervention	53	Female	Farming	No	21.6	26.1	30.1	51.3	53.8	54.8
Intervention	46	Female	Farming	Yes	21.3	28.5	22.8	55.7	70.8	57.4
Intervention	18	Female	Farming	No	26	26	32.3	41.1	68.9	65.9
Intervention	47	Male	Farming	No	23.2	36.4	32.5	73.1	55.2	66.6
Intervention	41	Male	Farming	Yes	23.5	27.7	34.9	59.4	74.1	58.6
Intervention	38	Male	Other	Yes	26.1	36.3	28.7	53.7	62	80.1
Intervention	33	Female	Other	Yes	26.5	29.7	30.2	40.9	62.1	72.9
Intervention	53	Male	Farming	Yes	17.4	27.9	33.4	61.1	69.6	70.2
Intervention	50	Female	Farming	Yes	24.5	32.9	26.2	28.3	68.4	84.6
Intervention	28	Female	Farming	Yes	23.2	29.6	31.1	33.8	57.8	62.3
Intervention	43	Female	Farming	Yes	26.9	35.3	26.1	43.7	46.5	57.2
Intervention	26	Male	Farming	No	16	29	31.2	44.7	66.8	71
Intervention	20	Female	Farming	Yes	18.5	28	30.7	36.1	59.8	60
Intervention	30	Female	Other	No	20.6	28	25.4	60.1	65.5	81.4
Intervention	49	Male	Other	Yes	27.3	34.6	31.2	33.9	62.2	61.6
Intervention	50	Male	Pastoralism	Yes	20.2	30.8	27.3	68	66.8	74
Intervention	45	Female	Farming	Yes	21.2	26.9	28.4	54.5	50.5	52.7
Intervention	47	Male	Farming	Yes	18.5	24.2	32.4	48.8	63.6	53.1
Intervention	45	Male	Farming	Yes	24.7	30.6	33.5	48.7	60.5	57.2
Intervention	30	Male	Farming	Yes	24.2	26.1	30.8	35.7	66.9	66.2
Intervention	44	Male	Farming	Yes	19.1	22.9	29.2	67.5	62.6	74.8
Intervention	48	Female	Farming	No	17	34	32	20.5	69.5	83.3
Intervention	48	Female	Farming	No	24.6	25	27.8	47	39.6	59.9
Intervention	53	Female	Farming	Yes	23.5	22.8	32.8	46.7	55.6	63.6
Intervention	47	Female	Other	Yes	18.6	29.3	26.6	52.2	70.5	60.2
Intervention	43	Female	Farming	Yes	24.3	28.6	28.2	52.5	60.3	62.7
Intervention	52	Female	Farming	Yes	24.1	26.4	25.3	28	81.8	56.9
Intervention	38	Male	Farming	Yes	26.6	30.7	28.8	44.1	73	48.5
Intervention	27	Female	Farming	Yes	25	28.6	35.3	41.1	68.1	63.6
Intervention	36	Male	Farming	Yes	20	38.4	35.3	62.5	46.3	58.4
[truncated: 18,001 more rows]
